# Supplementary material for: Genetic- and Fiber-Diet-Mediated Changes in Antibiotic Resistance Genes in Pig Colon Contents and Feces and Their Driving Factors
Source: MDPI journal article supplement (doi:10.3390/microorganisms11102370), 2023-09-22
Supplement: s1 [file s1]

# **Genetic and fiber diet-mediated changes in antibiotic resistance genes in pig colon contents and feces and their driving factors**

Tao Wang<sup>1,2†</sup>, Yuheng Luo<sup>1,2†</sup>, Xiangfeng Kong<sup>3\*</sup>, Bing Yu<sup>1,2</sup>, Ping Zheng<sup>1,2</sup>, Zhiqing Huang<sup>1,2</sup>, Xiangbing Mao<sup>1,2</sup>, Jie Yu<sup>1,2</sup>, Junqiu Luo<sup>1,2</sup>, Hui Yan<sup>1,2</sup>, Jun He<sup>1,2\*</sup>

1Institute of Animal Nutrition, Sichuan Agricultural University, Chengdu, Sichuan 611130, P. R. China

2Key Laboratory of Animal Disease-resistant Nutrition, Chengdu, Sichuan 611130, P. R. China

3Institute of Subtropical Agriculture, Chinese Academy of Sciences, Changsha, Hunan 611130, P. R. China 410125, P. R. China

\*Corresponding author: Institute of Animal Nutrition, Sichuan Agricultural University, Chengdu, Sichuan 611130, P. R. China; Tel: +86-13419354223, Fax: +86-28-86291781, Email: hejun8067@sicau.edu.cn; nnkxf@isa.ac.cn.

† Contribute equally to this work.

Keywords: Antibiotic resistance genes (ARGs); pig; High fiber; colon contents; Feces

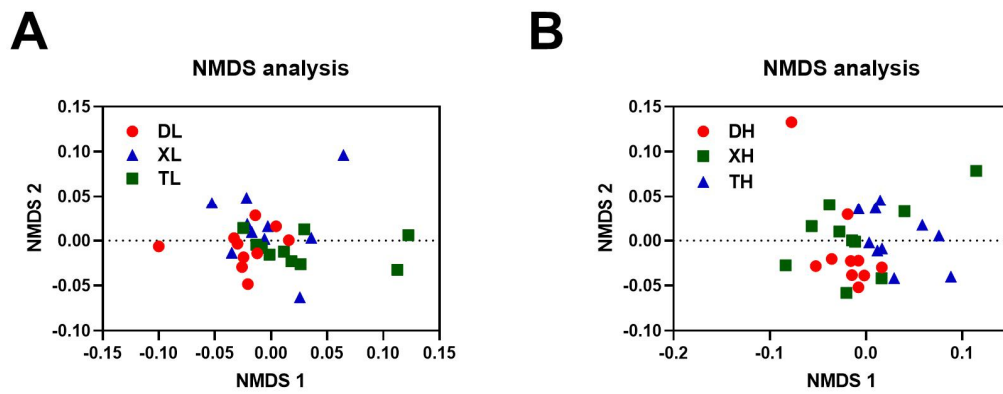

**Figure S1:** Plots of NMDS analysis between different varieties at low fiber level (A) and high fiber level (B).

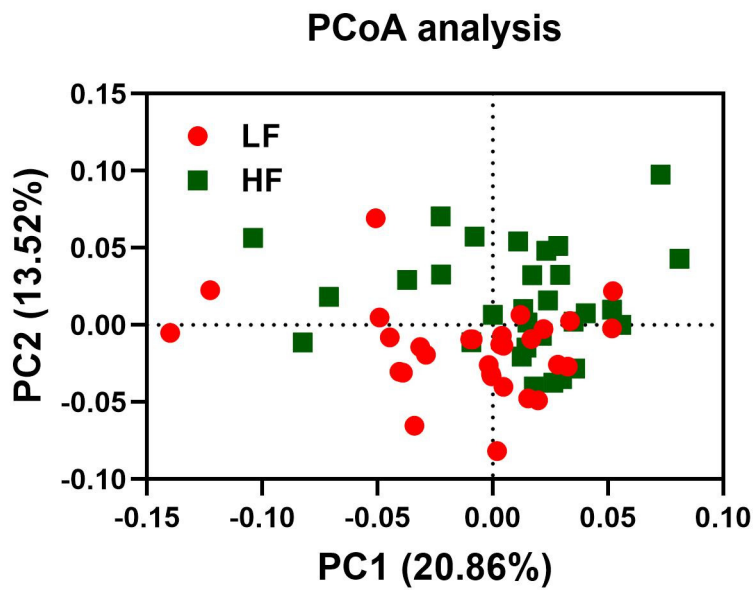

**Figure S2:** Principal component analysis of ARGs gene abundance between different fiber levels.

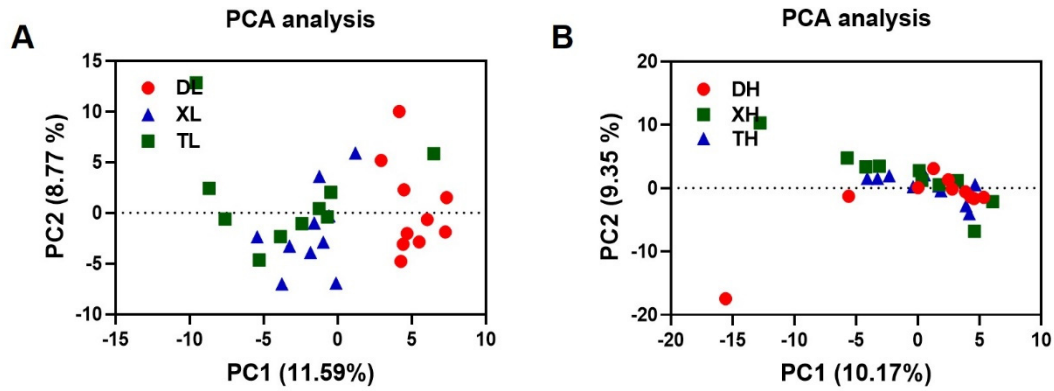

**Figure S3:** Plots of PCA analysis of microorganisms at different levels for different varieties at low fiber levels (A) and high fiber levels (B).

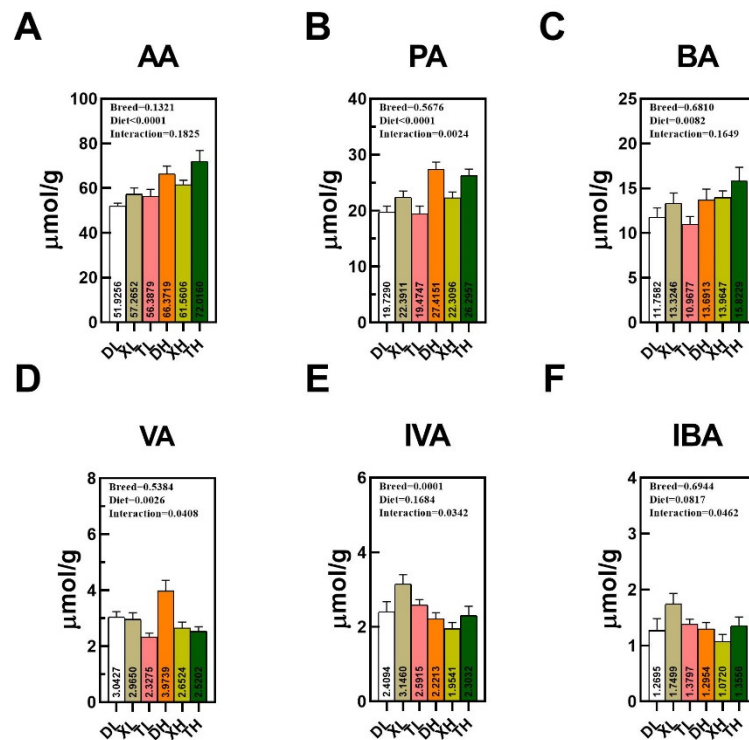

**Figure S4:** Changes in SCFAs content in feces of different pig breeds at different fiber levels. The content of AA (A), PA (B), BA (C), VA (D), IVA (E), and IBA (F).
