# Supplementary material for: Genetic- and Fiber-Diet-Mediated Changes in Antibiotic Resistance Genes in Pig Colon Contents and Feces and Their Driving Factors
Source: Microorganisms. 2023 Sep 22;11(10):2370. doi: 10.3390/microorganisms11102370 (PMC10609257; doi:10.3390/microorganisms11102370)
Supplement: Supplementary file 1 [file microorganisms-11-02370-s001.zip › Supplementary Table.xlsx]

## Sheet: Table S1
Table S1. Information of 850 unique antimicrobial resistance genes (ARGs)
ARO accession	Aro_name	Description	AMR_Gene_Family	Drug_Class	Antibiotic_class	Resistance_Mechanism
3000005	vanD	VanD is a D-Ala-D-Ala ligase homolog similar to VanA, and can synthesize D-Ala-D-Lac, an alternative substrate for peptidoglycan synthesis that reduces vancomycin binding affinity. It is associated with both vancomycin and teicoplanin resistance.	glycopeptide resistance gene cluster;van ligase	glycopeptide antibiotic	Glycopeptide	antibiotic target alteration
3000010	vanA	VanA is a D-Ala-D-Ala ligase homolog that synthesizes D-Ala-D-Lac, an alternative substrate for peptidoglycan synthesis that reduces vancomycin binding affinity. It has been isolated from VREs. It is associated with both vancomycin and teicoplanin resistance.	glycopeptide resistance gene cluster;van ligase	glycopeptide antibiotic	Glycopeptide	antibiotic target alteration
3000013	vanB	VanB is a D-Ala-D-Ala ligase homolog similar to VanA, and can synthesize D-Ala-D-Lac, an alternative substrate for peptidoglycan synthesis that reduces vancomycin binding affinity. It has been isolated from VREs. It is associated with vancomycin resistance, but not teicoplanin resistance.	glycopeptide resistance gene cluster;van ligase	glycopeptide antibiotic	Glycopeptide	antibiotic target alteration
3000024	patA	PatA is an ABC transporter of Streptococcus pneumoniae that interacts with PatB to confer fluoroquinolone resistance.	ATP-binding cassette (ABC) antibiotic efflux pump	fluoroquinolone antibiotic	Fluoroquinolone	antibiotic efflux
3000025	patB	PatB is an ABC transporter of Streptococcus pneumoniae that interacts with PatA to confer fluoroquinolone resistance..	ATP-binding cassette (ABC) antibiotic efflux pump	fluoroquinolone antibiotic	Fluoroquinolone	antibiotic efflux
3000026	mepA	MepA is an efflux protein regulated by MepR and part of the MepRAB cluster. Its presence in Staphylococcus aureus led to multidrug resistance, while it has also been shown to decrease tigecycline susceptibility.	multidrug and toxic compound extrusion (MATE) transporter	glycylcycline;tetracycline antibiotic	Multidrug	antibiotic efflux
3000027	emrA	EmrA is a membrane fusion protein, providing an efflux pathway with EmrB and TolC between the inner and outer membranes of E. coli, a Gram-negative bacterium.	major facilitator superfamily (MFS) antibiotic efflux pump	fluoroquinolone antibiotic	Fluoroquinolone	antibiotic efflux
3000074	emrB	emrB is a translocase in the emrB -TolC efflux protein in E. coli. It recognizes substrates including carbonyl cyanide m-chlorophenylhydrazone (CCCP), nalidixic acid, and thioloactomycin.	major facilitator superfamily (MFS) antibiotic efflux pump	fluoroquinolone antibiotic	Fluoroquinolone	antibiotic efflux
3000118	vgaB	Vga(B) is an ABC-F protein expressed in staphylococci that confers resistance to streptogramin A antibiotics and related compounds. It is associated with plasmid DNA.	ABC-F ATP-binding cassette ribosomal protection protein	lincosamide antibiotic;macrolide antibiotic;oxazolidinone antibiotic;phenicol antibiotic;pleuromutilin antibiotic;streptogramin antibiotic;tetracycline antibiotic	Multidrug	antibiotic target protection
3000124	mecI	mecI acts as a repressor of transcription of the mecA/mecR1/mecI operon.	methicillin resistant PBP2	carbapenem;cephalosporin;cephamycin;monobactam;penam	Multidrug	antibiotic target replacement
3000149	FosA	An enzyme that confers resistance to fosfomycin in Serratia marcescens by breaking the epoxide ring of the molecule. It depends on the cofactors Manganese (II) and Potassium and uses Glutathione (GSH) as the nucleophilic molecule. In Pseudomonas aeruginosa, FosA catalyzes the conjugation of glutathione to carbon-1 of fosfomycin, rendering it ineffective as an antibacterial drug.	fosfomycin thiol transferase	fosfomycin	Fosfomycin	antibiotic inactivation
3000165	tet(A)	TetA is a tetracycline efflux pump found in many species of Gram-negative bacteria.	major facilitator superfamily (MFS) antibiotic efflux pump	tetracycline antibiotic	Tetracycline	antibiotic efflux
3000166	tet(B)	Tet(B) is a tetracycline efflux protein expressed in many Gram-negative bacteria. It confers resistance to tetracycline, doxycycline, and minocycline, but not tigecycline.	major facilitator superfamily (MFS) antibiotic efflux pump	tetracycline antibiotic	Tetracycline	antibiotic efflux
3000167	tet(C)	Tet(C) is a tetracycline efflux pump found in many species of Gram-negative bacteria. It is typically found in plasmid DNA.	major facilitator superfamily (MFS) antibiotic efflux pump	tetracycline antibiotic	Tetracycline	antibiotic efflux
3000173	tet(E)	TetE is a tetracycline efflux pump found in many Gram-negative bacteria, especially those in water environments. The gene is found on large plasmids.	major facilitator superfamily (MFS) antibiotic efflux pump	tetracycline antibiotic	Tetracycline	antibiotic efflux
3000175	tet(H)	TetH is a tetracycline efflux protein expressed in Gram-negative bacteria (Actinobacillus, Acinetobacter, Gallibacterium, Histophilus, Mannheimia, Moraxella, Pasteurella, and Psychrobacter). Its gene is linked to the resistance genes sul2, and strAB, which confer resistance to sulfamethoxazole and streptomycin, respectively.	major facilitator superfamily (MFS) antibiotic efflux pump	tetracycline antibiotic	Tetracycline	antibiotic efflux
3000177	tet(J)	TetJ is a tetracycline efflux protein expressed in Gram-negative bacteria (Escherichia, Morganella, and Proteus).	major facilitator superfamily (MFS) antibiotic efflux pump	tetracycline antibiotic	Tetracycline	antibiotic efflux
3000178	tet(K)	TetK is a tetracycline efflux protein found in both Gram-negative (Haemophilus and Gallibacterium) and Gram-positive (many species, including mycobacteria) bacteria.	major facilitator superfamily (MFS) antibiotic efflux pump	tetracycline antibiotic	Tetracycline	antibiotic efflux
3000179	tet(L)	TetL is a tetracycline efflux protein found in many species of Gram-negative and Gram-positive bacteria.	major facilitator superfamily (MFS) antibiotic efflux pump	tetracycline antibiotic	Tetracycline	antibiotic efflux
3000180	tetA(P)	TetA(P) is a inner membrane tetracycline efflux protein found on the same operon as the ribosomal protection protein TetB(P). It is found in Clostridium, a Gram-positive bacterium.	major facilitator superfamily (MFS) antibiotic efflux pump	tetracycline antibiotic	Tetracycline	antibiotic efflux
3000181	tet(V)	TetV is a tetracycline efflux protein that has been found in Mycolicibacterium smegmatis and Mycolicibacterium fortuitum.	major facilitator superfamily (MFS) antibiotic efflux pump	tetracycline antibiotic	Tetracycline	antibiotic efflux
3000183	tet(Z)	TetZ is a tetracycline efflux protein found in Gram-positive bacteria (Corynebacterium and Lactobacillus). It is associated with plasmid DNA.	major facilitator superfamily (MFS) antibiotic efflux pump	tetracycline antibiotic	Tetracycline	antibiotic efflux
3000186	tetM	TetM is a ribosomal protection protein that confers tetracycline resistance. It is found on transposable DNA elements and its horizontal transfer between bacterial species has been documented.	tetracycline-resistant ribosomal protection protein	tetracycline antibiotic	Tetracycline	antibiotic target protection
3000190	tetO	TetO is a ribosomal protection protein. It is associated with conjugative plasmids.	tetracycline-resistant ribosomal protection protein	tetracycline antibiotic	Tetracycline	antibiotic target protection
3000191	tetQ	TetQ is a ribosomal protection protein. Its gene is associated with a conjugative transposon and has been found in both Gram-positive and Gram-negative bacteria.	tetracycline-resistant ribosomal protection protein	tetracycline antibiotic	Tetracycline	antibiotic target protection
3000192	tetS	Tet(S) is a ribosomal protection protein found in Gram-positive and Gram-negative strains. It is similar to tet(M) and tet(O).	tetracycline-resistant ribosomal protection protein	tetracycline antibiotic	Tetracycline	antibiotic target protection
3000193	tetT	Tet(T) is a ribosomal protection protein of streptococci. It is similar to Tet(Q).	tetracycline-resistant ribosomal protection protein	tetracycline antibiotic	Tetracycline	antibiotic target protection
3000194	tetW	TetW is a ribosomal protection protein. It is associated with both conjugative and non conjugative DNA and has been found strains of Clostridioides difficile.	tetracycline-resistant ribosomal protection protein	tetracycline antibiotic	Tetracycline	antibiotic target protection
3000195	tetB(P)	TetB(P) is a tetracycline ribosomal protection protein found on the same operon as tetA(P), a tetracycline efflux protein.	tetracycline-resistant ribosomal protection protein	tetracycline antibiotic	Tetracycline	antibiotic target protection
3000196	tet32	Tet32 is a tetracycline resistance gene similar to Tet(O), and binds to the ribosome to confer tetracycline resistance as a ribosomal protection protein.	tetracycline-resistant ribosomal protection protein	tetracycline antibiotic	Tetracycline	antibiotic target protection
3000197	tet36	Tet36 is a tetracycline resistance gene found in Bacteroides similar to Tet(Q), and binds to the ribosome to confer antibiotic resistance as a ribosomal protection protein.	tetracycline-resistant ribosomal protection protein	tetracycline antibiotic	Tetracycline	antibiotic target protection
3000198	FosX	FosX is an enzyme used to confer resistance to fosfomycin. It's dependent on the cofactor, manganese (II), and uses water to generate a vicinal diol.	fosfomycin thiol transferase	fosfomycin	Fosfomycin	antibiotic inactivation
3000205	tetX	TetX is a flavin-dependent monooxygenase conferring resistance to tetracycline antibiotics. TetX hydroxylates position 11a of the tetraketide group thus inactivating the antibiotic.	tetracycline inactivation enzyme	glycylcycline;tetracycline antibiotic	Tetracycline	antibiotic inactivation
3000206	emrK	emrK is a membrane fusion protein that is a homolog of EmrA. Together with the inner membrane transporter EmrY and the outer membrane channel TolC, it mediates multidrug efflux.	major facilitator superfamily (MFS) antibiotic efflux pump	tetracycline antibiotic	Multidrug	antibiotic efflux
3000215	mecR1	mecR1 is a transmembrane spanning and signal transducing protein which in response to interaction with beta-lactam antibiotics results in upregulation of the mecA/mecR1/mecI operon.	methicillin resistant PBP2	carbapenem;cephalosporin;cephamycin;monobactam;penam	Beta-lactam	antibiotic target replacement
3000216	acrB	Protein subunit of AcrA-AcrB-TolC multidrug efflux complex. AcrB functions as a herterotrimer which forms the inner membrane component and is primarily responsible for substrate recognition and energy transduction by acting as a drug/proton antiporter.	resistance-nodulation-cell division (RND) antibiotic efflux pump	cephalosporin;fluoroquinolone antibiotic;glycylcycline;penam;phenicol antibiotic;rifamycin antibiotic;tetracycline antibiotic;triclosan	Multidrug	antibiotic efflux
3000217	blaR1	blaR1 is a transmembrane spanning and signal transducing protein which in response to interaction with beta-lactam antibiotics results in upregulation of the blaZ/blaR1/blaI operon.	blaZ beta-lactamase	penam	Beta-lactam	antibiotic inactivation
3000230	ANT(2'')-Ia	Plasmid or integron-encoded nucleotidylylation of 2-deoxystreptamine aminoglycosides at the hydroxyl group at position 2'' in P. aeruginosa, K. pneumoniae, Morganella morganii, E. coli, S. typhimurium, C. freundii and A. baumannii	ANT(2'')	aminoglycoside antibiotic	Aminoglycoside	antibiotic inactivation
3000237	TolC	TolC is a protein subunit of many multidrug efflux complexes in Gram negative bacteria. It is an outer membrane efflux protein and is constitutively open. Regulation of efflux activity is often at its periplasmic entrance by other components of the efflux complex.	ATP-binding cassette (ABC) antibiotic efflux pump;major facilitator superfamily (MFS) antibiotic efflux pump;resistance-nodulation-cell division (RND) antibiotic efflux pump	aminocoumarin antibiotic;aminoglycoside antibiotic;carbapenem;cephalosporin;cephamycin;fluoroquinolone antibiotic;glycylcycline;macrolide antibiotic;penam;penem;peptide antibiotic;phenicol antibiotic;rifamycin antibiotic;tetracycline antibiotic;triclosan	Multidrug	antibiotic efflux
3000245	RbpA	RNA-polymerase binding protein which confers resistance to rifampin.	RbpA bacterial RNA polymerase-binding protein	rifamycin antibiotic	Rifamycin	antibiotic target protection
3000250	ErmC	ErmC is a methyltransferase that catalyzes the methylation of A2058 of the 23S ribosomal RNA in two steps. Expression of ErmC is inducible by erythromycin. The leader peptide causes attenuation of the mRNA and stabilizes the structure preventing further translation. When erythromycin is present, it binds the leader peptide causing a change in conformation allowing for the expression of ErmC.	Erm 23S ribosomal RNA methyltransferase	lincosamide antibiotic;macrolide antibiotic;streptogramin antibiotic	MLS	antibiotic target alteration
3000251	msrA	MsrA is an ABC-F subfamily ribosomal protection protein expressed in Staphylococcus species which confers resistance to erythromycin and streptogramin B antibiotics through antibiotic target protection mechanisms. It is associated with plasmid DNA.	ABC-F ATP-binding cassette ribosomal protection protein	lincosamide antibiotic;macrolide antibiotic;oxazolidinone antibiotic;phenicol antibiotic;pleuromutilin antibiotic;streptogramin antibiotic;tetracycline antibiotic	Multidrug	antibiotic target protection
3000254	emrY	emrY is a multidrug transport that moves substrates across the inner membrane of the Gram-negative E. coli. It is a homolog of emrB.	major facilitator superfamily (MFS) antibiotic efflux pump	tetracycline antibiotic	Multidrug	antibiotic efflux
3000263	marA	In the presence of antibiotic stress, E. coli overexpresses the global activator protein MarA, which besides inducing MDR efflux pump AcrAB, also down- regulates synthesis of the porin OmpF.	General Bacterial Porin with reduced permeability to beta-lactams;resistance-nodulation-cell division (RND) antibiotic efflux pump	carbapenem;cephalosporin;cephamycin;fluoroquinolone antibiotic;glycylcycline;monobactam;penam;penem;phenicol antibiotic;rifamycin antibiotic;tetracycline antibiotic;triclosan	Multidrug	antibiotic efflux;reduced permeability to antibiotic
3000300	lsaA	LsaA is an ABC-F subfamily protein expressed in Enterococcus faecalis. It confers resistance to clindamycin, quinupristin-dalfopristin, and dalfopristin.	ABC-F ATP-binding cassette ribosomal protection protein	lincosamide antibiotic;macrolide antibiotic;oxazolidinone antibiotic;phenicol antibiotic;pleuromutilin antibiotic;streptogramin antibiotic;tetracycline antibiotic	Multidrug	antibiotic target protection
3000316	mphA	The mphA gene encodes for resistance enzyme MPH(2')-I which preferentially inactivate 14-membered macrolides (e.g.erythromycin, telithromycin, roxithromycin) over 16-membered macrolides (e.g.tylosin, spiramycin). It phosphorylates macrolides at 2'-OH hydroxyl of desosamine sugar of macrolides in a GTP-dependent manner.	macrolide phosphotransferase (MPH)	macrolide antibiotic	MLS	antibiotic inactivation
3000318	mphB	The mphB gene encodes for MPH(2')-II. This enzymes phosphorylates 14-membered and 16-membered macrolides. It phosphorylates macrolides in GTP- dependent manner at 2'-OH hydroxyl of desosamine sugar of macrolides.	macrolide phosphotransferase (MPH)	macrolide antibiotic	MLS	antibiotic inactivation
3000326	ErmE	ErmE is a methyltransferase found in the erythromycin producer Saccharopolyspora erythraea. Like other Erm enzymes, it catalyzes the methylation of A2058 of the 23S ribosomal RNA. The gene is found within the erythromycin biosynthetic cluster and is responsible for self-resistance.	Erm 23S ribosomal RNA methyltransferase	lincosamide antibiotic;macrolide antibiotic;streptogramin antibiotic	MLS	antibiotic target alteration
3000347	ErmA	ErmA confers the MLSb phenotype. Similar to ErmC, Expression of ErmA is inducible by erythromycin. The leader peptide causes attenuation of the mRNA and stabilizes the structure preventing further translation. When erythromycin is present, it binds the leader peptide causing a change in conformation allowing for the expression of ErmA.	Erm 23S ribosomal RNA methyltransferase	lincosamide antibiotic;macrolide antibiotic;streptogramin antibiotic	MLS	antibiotic target alteration
3000368	vanC	VanC is a D-Ala-D-Ala ligase homolog that synthesizes D-Ala-D-Ser, an alternative substrate for peptidoglycan synthesis that reduces vancomycin binding affinity. It is specific to Enterococcus gallinarum and E. casseliflavus, providing intrinsic resistance.	glycopeptide resistance gene cluster;van ligase	glycopeptide antibiotic	Glycopeptide	antibiotic target alteration
3000375	ErmB	ErmB confers the MLSb phenotype. Similar to ErmC, expression of ErmB is inducible by erythromycin. The leader peptide causes attenuation of the mRNA and stabilizes the structure preventing further translation. When erythromycin is present, it binds the leader peptide causing a change in conformation allowing for the expression of ErmB.	Erm 23S ribosomal RNA methyltransferase	lincosamide antibiotic;macrolide antibiotic;streptogramin antibiotic	MLS	antibiotic target alteration
3000377	MexA	MexA is the membrane fusion protein of the MexAB-OprM multidrug efflux complex.	resistance-nodulation-cell division (RND) antibiotic efflux pump	aminocoumarin antibiotic;carbapenem;cephalosporin;cephamycin;diaminopyrimidine antibiotic;fluoroquinolone antibiotic;macrolide antibiotic;monobactam;penam;penem;peptide antibiotic;phenicol antibiotic;sulfonamide antibiotic;tetracycline antibiotic	Multidrug	antibiotic efflux
3000378	MexB	MexB is the inner membrane multidrug exporter of the efflux complex MexAB-OprM.	resistance-nodulation-cell division (RND) antibiotic efflux pump	aminocoumarin antibiotic;carbapenem;cephalosporin;cephamycin;diaminopyrimidine antibiotic;fluoroquinolone antibiotic;macrolide antibiotic;monobactam;penam;penem;peptide antibiotic;phenicol antibiotic;sulfonamide antibiotic;tetracycline antibiotic	Multidrug	antibiotic efflux
3000379	OprM	OprM is an outer membrane factor protein found in Pseudomonas aeruginosa and Burkholderia vietnamiensis. It is part of the MexAB-OprM, MexVW-OprM, MexXY-OprM and the AmrAB-OprM complex.	resistance-nodulation-cell division (RND) antibiotic efflux pump	acridine dye;aminocoumarin antibiotic;aminoglycoside antibiotic;carbapenem;cephalosporin;cephamycin;diaminopyrimidine antibiotic;fluoroquinolone antibiotic;macrolide antibiotic;monobactam;penam;penem;peptide antibiotic;phenicol antibiotic;sulfonamide antibiotic;tetracycline antibiotic	Multidrug	antibiotic efflux
3000391	norA	NorA is a multidrug efflux pump in Staphylococcus aureus that confers resistance to fluoroquinolones and other structurally unrelated antibiotics like acriflavine. It shares 30% similarity with NorA, and is a structural homolog of Bmr of Bacillus subtilis. It is regulated by arlRS and mgrA, the latter also known as NorR.	major facilitator superfamily (MFS) antibiotic efflux pump	acridine dye;fluoroquinolone antibiotic	Multidrug	antibiotic efflux
3000392	Erm(37)	Erm(37) is found in Mycobacterium species and confers the MLSb phenotype. In addition to methylation of A2058 this Erm methylates adjacent adenosines (A2057 and A2059) as well.	Erm 23S ribosomal RNA methyltransferase	lincosamide antibiotic;macrolide antibiotic;streptogramin antibiotic	MLS	antibiotic target alteration
3000410	sul1	Sul1 is a sulfonamide resistant dihydropteroate synthase of Gram-negative bacteria. It is linked to other resistance genes of class 1 integrons.	sulfonamide resistant sul	sulfonamide antibiotic;sulfone antibiotic	Sulfonamide	antibiotic target replacement
3000412	sul2	Sul2 is a sulfonamide resistant dihydropteroate synthase of Gram-negative bacteria, usually found on small plasmids.	sulfonamide resistant sul	sulfonamide antibiotic;sulfone antibiotic	Sulfonamide	antibiotic target replacement
3000413	sul3	Sul3 is a sulfonamide resistant dihydropteroate synthase similar to Sul1 and Sul2. Its resistance gene was found encoded in E. coli plasmid DNA of sulfonamide resistant isolates.	sulfonamide resistant sul	sulfonamide antibiotic;sulfone antibiotic	Sulfonamide	antibiotic target replacement
3000421	norB	NorB is a multidrug efflux pump in Staphylococcus aureus that confers resistance to fluoroquinolones and other structurally unrelated antibiotics like tetracycline. It shares 30% similarity with NorB, and is a structural homolog of Blt of Bacillus subtilis. It is regulated by mgrA, also known as NorR.	major facilitator superfamily (MFS) antibiotic efflux pump	fluoroquinolone antibiotic	Multidrug	antibiotic efflux
3000444	rphA	The enzymatic inactivation of rifampin by phosphorylation at the 21-OH position.	rifampin phosphotransferase	rifamycin antibiotic	Rifamycin	antibiotic inactivation
3000448	QepA1	QepA1 is a plasmid-mediated efflux pump in E. coli, shown to contribute to fluoroquinolone resistance. It is regulated by sox genes, also known as global stress regulators.	major facilitator superfamily (MFS) antibiotic efflux pump	fluoroquinolone antibiotic	Fluoroquinolone	antibiotic efflux
3000462	mgtA	A macrolide glycosyltransferase encoded by the mgtA gene in Streptomyces lividans. This enzyme inactivates macrolides using UDP-glucose as a cofactor. Its optimal substrates are lankamycin, calcomycin, rosaramicin, methymycin, and pikromycin, while interactions with erythomycin, oldeandomycin, azithromycin, and tylosin were weaker. It is inactive against spiramycin and carbomycin. Mechanism first…	mgt macrolide glycotransferase	macrolide antibiotic	MLS	antibiotic inactivation
3000463	gimA	A macrolide glycosyltransferase encoded by the gimA gene in Streptomyces ambofaciens, a natural producer of the macrolide antibiotic spiramycin. Chalcomycin, methymycin, tylosin, pikromycin, rosaramicin, oleandomycin, josamycin, and carbomycin are preferred substrates of gimA glycosyltransferase, while erythromycin and spiramycin have notably low binding affinities. GimA may be able to inactivate…	gimA family macrolide glycosyltransferase	macrolide antibiotic	MLS	antibiotic inactivation
3000467	NDM-5	New Delhi beta-lactamase NDM-5.	NDM beta-lactamase	carbapenem;cephalosporin;cephamycin;penam	Beta-lactam	antibiotic inactivation
3000478	tet(33)	Tet33 is a tetracycline efflux pump found in Gram-positive bacteria, including Arthrobacter and Corynebacterium.	major facilitator superfamily (MFS) antibiotic efflux pump	tetracycline antibiotic	Tetracycline	antibiotic efflux
3000481	tet(35)	Tet35 is a tetracycline efflux pump found in the Gram-negative Vibrio and Stenotrophomonas. It is unrelated to other tet resistance genes.	ATP-binding cassette (ABC) antibiotic efflux pump	tetracycline antibiotic	Tetracycline	antibiotic efflux
3000491	acrD	AcrD is an aminoglycoside efflux pump expressed in E. coli. Its expression can be induced by indole, and is regulated by baeRS and cpxAR.	resistance-nodulation-cell division (RND) antibiotic efflux pump	aminoglycoside antibiotic	Aminoglycoside	antibiotic efflux
3000495	ErmD	ErmD confers MLSb phenotype.	Erm 23S ribosomal RNA methyltransferase	lincosamide antibiotic;macrolide antibiotic;streptogramin antibiotic	MLS	antibiotic target alteration
3000498	ErmF	ErmF confers the MLSb phenotype.	Erm 23S ribosomal RNA methyltransferase	lincosamide antibiotic;macrolide antibiotic;streptogramin antibiotic	MLS	antibiotic target alteration
3000499	AcrE	AcrE is a membrane fusion protein, similar to AcrA.	resistance-nodulation-cell division (RND) antibiotic efflux pump	cephalosporin;cephamycin;fluoroquinolone antibiotic;penam	Multidrug	antibiotic efflux
3000501	rpoB2	Due to gene duplication, the genomes of Nocardia species include both rifampin-sensitive beta-subunit of RNA polymerase (rpoB) and rifampin-resistant beta-subunit of RNA polymerase (rpoB2) genes, with ~88% similarity between the two gene products. Expression of the rpoB2 variant results in replacement of rifampin sensitivity with rifampin resistance.	rifamycin-resistant beta-subunit of RNA polymerase (rpoB)	peptide antibiotic;rifamycin antibiotic	Multidrug	antibiotic target alteration;antibiotic target replacement
3000502	AcrF	AcrF is a inner membrane transporter, similar to AcrB.	resistance-nodulation-cell division (RND) antibiotic efflux pump	cephalosporin;cephamycin;fluoroquinolone antibiotic;penam	Multidrug	antibiotic efflux
3000504	golS	GolS is a regulator activated by the presence of golD, and promotes the expression of the MdsABC efflux pump.	resistance-nodulation-cell division (RND) antibiotic efflux pump	carbapenem;cephalosporin;cephamycin;monobactam;penam;penem;phenicol antibiotic	Multidrug	antibiotic efflux
3000508	gadX	GadX is an AraC-family regulator that promotes mdtEF expression to confer multidrug resistance.	resistance-nodulation-cell division (RND) antibiotic efflux pump	fluoroquinolone antibiotic;macrolide antibiotic;penam	Multidrug	antibiotic efflux
3000510	Staphylococcus mupB conferring resistance to mupirocin	An alternative isoleucyl-tRNA synthetase conferring resistance to mupirocin.	antibiotic-resistant isoleucyl-tRNA synthetase (ileS)	mupirocin	Mupirocin	antibiotic target alteration
3000516	emrR	EmrR is a negative regulator for the EmrAB-TolC multidrug efflux pump in E. coli. Mutations lead to EmrAB-TolC overexpression.	major facilitator superfamily (MFS) antibiotic efflux pump	fluoroquinolone antibiotic	Multidrug	antibiotic efflux
3000518	CRP	CRP is a global regulator that represses MdtEF multidrug efflux pump expression.	resistance-nodulation-cell division (RND) antibiotic efflux pump	fluoroquinolone antibiotic;macrolide antibiotic;penam	Multidrug	antibiotic efflux
3000521	Staphylococcus mupA conferring resistance to mupirocin	An alternative isoleucyl-tRNA synthetase conferring resistance to mupirocin.	antibiotic-resistant isoleucyl-tRNA synthetase (ileS)	mupirocin	Mupirocin	antibiotic target alteration
3000522	ErmG	ErmG is a rRNA adenine N-6-methyltransferase that protects the ribosome from inactivation due to antibiotic binding.	Erm 23S ribosomal RNA methyltransferase	lincosamide antibiotic;macrolide antibiotic;streptogramin antibiotic	MLS	antibiotic target alteration
3000526	cmeR	CmeR is a repressor for the CmeABC multidrug efflux pump, binding to the cmeABC promoter region.	resistance-nodulation-cell division (RND) antibiotic efflux pump	cephalosporin;fluoroquinolone antibiotic;fusidic acid;macrolide antibiotic	Multidrug	antibiotic efflux
3000533	macA	MacA is a membrane fusion protein that forms an antibiotic efflux complex with MacB and TolC. macA corresponds to 1 locus in Pseudomonas aeruginosa PAO1 and 1 locus in Pseudomonas aeruginosa LESB58.	ATP-binding cassette (ABC) antibiotic efflux pump	macrolide antibiotic	MLS	antibiotic efflux
3000535	macB	MacB is an ATP-binding cassette (ABC) transporter that exports macrolides with 14- or 15- membered lactones. It forms an antibiotic efflux complex with MacA and TolC. macB corresponds to 1 locus in Pseudomonas aeruginosa PAO1 and 1 locus in Pseudomonas aeruginosa LESB58.	ATP-binding cassette (ABC) antibiotic efflux pump	macrolide antibiotic	MLS	antibiotic efflux
3000549	adeS	AdeS is a sensor kinase in the AdeRS regulatory system of AdeABC. It is essential for AdeABC expression.	resistance-nodulation-cell division (RND) antibiotic efflux pump	glycylcycline;tetracycline antibiotic	Multidrug	antibiotic efflux
3000553	adeR	AdeR is a positive regulator of AdeABC efflux system. AdeR inactivation leads to susceptibility to aminoglycoside antibiotics.	resistance-nodulation-cell division (RND) antibiotic efflux pump	glycylcycline;tetracycline antibiotic	Multidrug	antibiotic efflux
3000556	tet(44)	Tet44 is a tetracycline resistance gene found in Campylobacter fetus, and binds to the ribosome to confer antibiotic resistance as a ribosomal protection protein.	tetracycline-resistant ribosomal protection protein	tetracycline antibiotic	Tetracycline	antibiotic target protection
3000559	adeN	AdeN is a repressor of AdeIJK, a RND-type efflux pump in Acinetobacter baumannii. Its inactivation increases expression of AdeJ.	resistance-nodulation-cell division (RND) antibiotic efflux pump	carbapenem;cephalosporin;diaminopyrimidine antibiotic;fluoroquinolone antibiotic;lincosamide antibiotic;macrolide antibiotic;penem;phenicol antibiotic;rifamycin antibiotic;tetracycline antibiotic	Multidrug	antibiotic efflux
3000565	tet(38)	Tet38 is a tetracycline efflux pump found in the Gram-positive Staphylococcus aureus. It is regulated by mgrA, which also regulates NorB.	major facilitator superfamily (MFS) antibiotic efflux pump	tetracycline antibiotic	Tetracycline	antibiotic efflux
3000566	tet(39)	Tet39 is a tetracycline efflux pump found in Gram-negative bacteria, including Brevundimonas, Stenotrophomonas, Enterobacter, Alcaligenes, Acinetobacter, and Providencia.	major facilitator superfamily (MFS) antibiotic efflux pump	tetracycline antibiotic	Tetracycline	antibiotic efflux
3000567	tet(40)	Tet40 is a tetracycline efflux pump found in the Gram-positive Clostridium. It is similar to tetA(P).	major facilitator superfamily (MFS) antibiotic efflux pump	tetracycline antibiotic	Tetracycline	antibiotic efflux
3000569	tet(41)	Tet41 is a tetracycline efflux pump found in Serratia, a Gram-negative bacterium. It is related to Acinetobacter Tet(39).	major facilitator superfamily (MFS) antibiotic efflux pump	tetracycline antibiotic	Tetracycline	antibiotic efflux
3000572	tet(42)	Tet42 is a tetracycline efflux pump found in both Gram-negative (Pseudomonas) and Gram-positive (Microbacterium, Bacillus, Staphylococcus, Paenibacillus) bacteria.	major facilitator superfamily (MFS) antibiotic efflux pump	tetracycline antibiotic	Tetracycline	antibiotic efflux
3000573	tet(43)	Tet(43) is a tetracycline resistance gene with unknown origins, isolated from metagenomic DNA.	major facilitator superfamily (MFS) antibiotic efflux pump	tetracycline antibiotic	Tetracycline	antibiotic efflux
3000578	CcrA	This CcrA beta-lactamases is found in Bacteroides fragilis.	CcrA beta-lactamase	carbapenem	Beta-lactam	antibiotic inactivation
3000582	L1 beta-lactamase	L1 is an Ambler class B MBL; subclass B3 originally isolated from Stenotrophomonas maltophilia. It has activity against a broad range of beta-lactams and is only active with two Zn(II) ions in the active site.	L1 family beta-lactamase	cephalosporin	Beta-lactam	antibiotic inactivation
3000592	ErmN	ErmN is a methyltransferase found in the tylosin producer Streptomyces fradiae. Like other Erm enzymes, it catalyzes the methylation of A2058 of the 23S ribosomal RNA. Specifically, this enzyme transfers only one methyl group. The gene is found in the tylosin biosynthetic cluster and is responsible for self-resistance to tylosin.	Erm 23S ribosomal RNA methyltransferase	lincosamide antibiotic;macrolide antibiotic;streptogramin antibiotic	MLS	antibiotic target alteration
3000593	ErmQ	ErmQ confers MLSb phenotype.	Erm 23S ribosomal RNA methyltransferase	lincosamide antibiotic;macrolide antibiotic;streptogramin antibiotic	MLS	antibiotic target alteration
3000594	ErmR	ErmR is a methyltransferase found in the erythromycin producer Aeromicrobium erythreum. Like other Erm enzymes, it catalyzes the methylation of A2058 of the 23S ribosomal RNA. The gene is found within the erythromycin biosynthetic cluster and is responsible for self-resistance.	Erm 23S ribosomal RNA methyltransferase	lincosamide antibiotic;macrolide antibiotic;streptogramin antibiotic	MLS	antibiotic target alteration
3000595	ErmT	ErmT confers MLSb phenotype.	Erm 23S ribosomal RNA methyltransferase	lincosamide antibiotic;macrolide antibiotic;streptogramin antibiotic	MLS	antibiotic target alteration
3000596	ErmX	ErmX is a rRNA methyltransferase that protects the ribosome from inactivation due to antibiotic binding.	Erm 23S ribosomal RNA methyltransferase	lincosamide antibiotic;macrolide antibiotic;streptogramin antibiotic	MLS	antibiotic target alteration
3000598	Erm(31)	Erm(31) confers a MLSb resistant phenotype. Along with erm(30), these genes are responsible for self-resistance in the pikromycin/narbomycin/methymycin/neomethymycin producer, Streptomyces venezuelae.	Erm 23S ribosomal RNA methyltransferase	lincosamide antibiotic;macrolide antibiotic;streptogramin antibiotic	MLS	antibiotic target alteration
3000600	Erm(34)	ErmD confers MLSb phenotype.	Erm 23S ribosomal RNA methyltransferase	lincosamide antibiotic;macrolide antibiotic;streptogramin antibiotic	MLS	antibiotic target alteration
3000601	Erm(38)	ErmD confers MLSb phenotype.	Erm 23S ribosomal RNA methyltransferase	lincosamide antibiotic;macrolide antibiotic;streptogramin antibiotic	MLS	antibiotic target alteration
3000604	Erm(35)	ErmD confers MLSb phenotype.	Erm 23S ribosomal RNA methyltransferase	lincosamide antibiotic;macrolide antibiotic;streptogramin antibiotic	MLS	antibiotic target alteration
3000605	Erm(36)	ErmD confers MLSb phenotype.	Erm 23S ribosomal RNA methyltransferase	lincosamide antibiotic;macrolide antibiotic;streptogramin antibiotic	MLS	antibiotic target alteration
3000606	FEZ-1	FEZ-1 is an Ambler class B MBL; subclass B3 first isolated from Legionella gormanii. It has activity against a broad range of beta-lactams and is only active with two Zn(II) ions in the active site.	FEZ beta-lactamase	carbapenem;cephalosporin;penam	Beta-lactam	antibiotic inactivation
3000614	mefE	mefE is a proton motive efflux pump in Streptococcus pneumoniae that confers resistance to macrolides. It is found on the same operon as mefA and the ABC-efflux pump mel.	major facilitator superfamily (MFS) antibiotic efflux pump	macrolide antibiotic	MLS	antibiotic efflux
3000616	mel	Mel, a homolog of MsrA, is an ABC-F subfamily protein associated with macrolide resistance. It is expressed on the same operon as mefA and mefE, both MFS-type efflux proteins that confer macrolide resistance.	ABC-F ATP-binding cassette ribosomal protection protein	lincosamide antibiotic;macrolide antibiotic;oxazolidinone antibiotic;phenicol antibiotic;pleuromutilin antibiotic;streptogramin antibiotic;tetracycline antibiotic	Multidrug	antibiotic target protection
3000617	mecA	A foreign PBP2a acquired by lateral gene transfer that able to perform peptidoglycan synthesis in the presence of beta-lactams.	methicillin resistant PBP2	carbapenem;cephalosporin;cephamycin;monobactam;penam	Beta-lactam	antibiotic target replacement
3000620	adeL	AdeL is a regulator of AdeFGH in Acinetobacter baumannii. AdeL mutations are associated with AdeFGH overexpression and multidrug resistance.	resistance-nodulation-cell division (RND) antibiotic efflux pump	fluoroquinolone antibiotic;tetracycline antibiotic	Multidrug	antibiotic efflux
3000621	PC1 beta-lactamase (blaZ)	The blaZ beta-lactamase is found in Bacillus subtilis and Staphylococcus aureus.	blaZ beta-lactamase	penam	Beta-lactam	antibiotic inactivation
3000656	AcrS	AcrS is a repressor of the AcrAB efflux complex and is associated with the expression of AcrEF. AcrS is believed to regulate a switch between AcrAB and AcrEF efflux.	resistance-nodulation-cell division (RND) antibiotic efflux pump	cephalosporin;cephamycin;fluoroquinolone antibiotic;glycylcycline;penam;phenicol antibiotic;rifamycin antibiotic;tetracycline antibiotic;triclosan	Multidrug	antibiotic efflux
3000676	H-NS	H-NS is a histone-like protein involved in global gene regulation in Gram-negative bacteria. It is a repressor of the membrane fusion protein genes acrE, mdtE, and emrK as well as nearby genes of many RND-type multidrug exporters.	major facilitator superfamily (MFS) antibiotic efflux pump;resistance-nodulation-cell division (RND) antibiotic efflux pump	cephalosporin;cephamycin;fluoroquinolone antibiotic;macrolide antibiotic;penam;tetracycline antibiotic	Multidrug	antibiotic efflux
3000746	mepR	MepR is an upstream repressor of MepA in Staphylococcus aureus. It is part of the mepRAB operon.	multidrug and toxic compound extrusion (MATE) transporter	glycylcycline;tetracycline antibiotic	Multidrug	antibiotic efflux
3000753	abeM	AbeM is an multidrug efflux pump found in Acinetobacter baumannii.	multidrug and toxic compound extrusion (MATE) transporter	acridine dye;fluoroquinolone antibiotic;triclosan	Multidrug	antibiotic efflux
3000768	abeS	AbeS in an efflux pump of the SMR family of transporters found in Acinetobacter baumannii.	small multidrug resistance (SMR) antibiotic efflux pump	aminocoumarin antibiotic;macrolide antibiotic	Multidrug	antibiotic efflux
3000774	adeA	AdeA is the membrane fusion protein of the multidrug efflux complex AdeABC.	resistance-nodulation-cell division (RND) antibiotic efflux pump	glycylcycline;tetracycline antibiotic	Multidrug	antibiotic efflux
3000775	adeB	AdeB is the multidrug transporter of the adeABC efflux system.	resistance-nodulation-cell division (RND) antibiotic efflux pump	glycylcycline;tetracycline antibiotic	Multidrug	antibiotic efflux
3000777	adeF	AdeF is the membrane fusion protein of the multidrug efflux complex AdeFGH.	resistance-nodulation-cell division (RND) antibiotic efflux pump	fluoroquinolone antibiotic;tetracycline antibiotic	Multidrug	antibiotic efflux
3000778	adeG	AdeG is the inner membrane transporter of the AdeFGH multidrug efflux complex.	resistance-nodulation-cell division (RND) antibiotic efflux pump	fluoroquinolone antibiotic;tetracycline antibiotic	Multidrug	antibiotic efflux
3000779	adeH	AdeH is the outer membrane channel protein of the AdeFGH multidrug efflux complex.	resistance-nodulation-cell division (RND) antibiotic efflux pump	fluoroquinolone antibiotic;tetracycline antibiotic	Multidrug	antibiotic efflux
3000780	adeI	AdeI is the membrane fusion protein of the AdeIJK multidrug efflux complex.	resistance-nodulation-cell division (RND) antibiotic efflux pump	carbapenem;cephalosporin;diaminopyrimidine antibiotic;fluoroquinolone antibiotic;lincosamide antibiotic;macrolide antibiotic;penem;phenicol antibiotic;rifamycin antibiotic;tetracycline antibiotic	Multidrug	antibiotic efflux
3000781	adeJ	AdeJ is a RND efflux protein that acts as the inner membrane transporter of the AdeIJK efflux complex. It has 57% identity with E. coli AcrB.	resistance-nodulation-cell division (RND) antibiotic efflux pump	carbapenem;cephalosporin;diaminopyrimidine antibiotic;fluoroquinolone antibiotic;lincosamide antibiotic;macrolide antibiotic;penem;phenicol antibiotic;rifamycin antibiotic;tetracycline antibiotic	Multidrug	antibiotic efflux
3000782	adeK	AdeK is the outer membrane factor protein in the adeIJK multidrug efflux complex.	resistance-nodulation-cell division (RND) antibiotic efflux pump	carbapenem;cephalosporin;diaminopyrimidine antibiotic;fluoroquinolone antibiotic;lincosamide antibiotic;macrolide antibiotic;penem;phenicol antibiotic;rifamycin antibiotic;tetracycline antibiotic	Multidrug	antibiotic efflux
3000783	cmeA	CmeA is the membrane fusion protein of the CmeABC multidrug efflux complex.	resistance-nodulation-cell division (RND) antibiotic efflux pump	cephalosporin;fluoroquinolone antibiotic;fusidic acid;macrolide antibiotic	Multidrug	antibiotic efflux
3000784	cmeB	CmeB is the inner membrane transporter the CmeABC multidrug efflux complex.	resistance-nodulation-cell division (RND) antibiotic efflux pump	cephalosporin;fluoroquinolone antibiotic;fusidic acid;macrolide antibiotic	Multidrug	antibiotic efflux
3000785	cmeC	CmeC is the outer membrane channel protein of the CmeABC multidrug efflux complex.	resistance-nodulation-cell division (RND) antibiotic efflux pump	cephalosporin;fluoroquinolone antibiotic;fusidic acid;macrolide antibiotic	Multidrug	antibiotic efflux
3000789	mdsA	MdsA is the membrane fusion protein of the multidrug and metal efflux complex MdsABC.	resistance-nodulation-cell division (RND) antibiotic efflux pump	carbapenem;cephalosporin;cephamycin;monobactam;penam;penem;phenicol antibiotic	Multidrug	antibiotic efflux
3000790	mdsB	MdsB is the inner membrane transporter of the multidrug and metal efflux complex MdsABC. mdsB corresponds to 1 locus in Pseudomonas aeruginosa PAO1 (gene name: mexQ) and 2 loci in Pseudomonas aeruginosa LESB58.	resistance-nodulation-cell division (RND) antibiotic efflux pump	carbapenem;cephalosporin;cephamycin;monobactam;penam;penem;phenicol antibiotic	Multidrug	antibiotic efflux
3000791	mdsC	MdsC is the outer membrane channel of the multidrug and metal efflux complex MdsABC.	resistance-nodulation-cell division (RND) antibiotic efflux pump	carbapenem;cephalosporin;cephamycin;monobactam;penam;penem;phenicol antibiotic	Multidrug	antibiotic efflux
3000792	mdtA	MdtA is the membrane fusion protein of the multidrug efflux complex mdtABC.	resistance-nodulation-cell division (RND) antibiotic efflux pump	aminocoumarin antibiotic	Multidrug	antibiotic efflux
3000793	mdtB	MdtB is a transporter that forms a heteromultimer complex with MdtC to form a multidrug transporter. MdtBC is part of the MdtABC-TolC efflux complex.	resistance-nodulation-cell division (RND) antibiotic efflux pump	aminocoumarin antibiotic	Multidrug	antibiotic efflux
3000794	mdtC	MdtC is a transporter that forms a heteromultimer complex with MdtB to form a multidrug transporter. MdtBC is part of the MdtABC-TolC efflux complex. In the absence of MdtB, MdtC can form a homomultimer complex that results in a functioning efflux complex with a narrower drug specificity. mdtC corresponds to 3 loci in Pseudomonas aeruginosa PAO1 (gene name: muxC/muxB) and 3 loci in Pseudomonas ae…	resistance-nodulation-cell division (RND) antibiotic efflux pump	aminocoumarin antibiotic	Multidrug	antibiotic efflux
3000795	mdtE	MdtE is the membrane fusion protein of the MdtEF multidrug efflux complex. It shares 70% sequence similarity with AcrA.	resistance-nodulation-cell division (RND) antibiotic efflux pump	fluoroquinolone antibiotic;macrolide antibiotic;penam	Multidrug	antibiotic efflux
3000796	mdtF	MdtF is the multidrug inner membrane transporter for the MdtEF-TolC efflux complex.	resistance-nodulation-cell division (RND) antibiotic efflux pump	fluoroquinolone antibiotic;macrolide antibiotic;penam	Multidrug	antibiotic efflux
3000800	MexC	MexC is the membrane fusion protein of the MexCD-OprJ multidrug efflux complex.	resistance-nodulation-cell division (RND) antibiotic efflux pump	aminocoumarin antibiotic;aminoglycoside antibiotic;cephalosporin;diaminopyrimidine antibiotic;fluoroquinolone antibiotic;macrolide antibiotic;penam;phenicol antibiotic;tetracycline antibiotic	Multidrug	antibiotic efflux
3000801	MexD	MexD is the multidrug inner membrane transporter of the MexCD-OprJ complex.	resistance-nodulation-cell division (RND) antibiotic efflux pump	aminocoumarin antibiotic;aminoglycoside antibiotic;cephalosporin;diaminopyrimidine antibiotic;fluoroquinolone antibiotic;macrolide antibiotic;penam;phenicol antibiotic;tetracycline antibiotic	Multidrug	antibiotic efflux
3000802	OprJ	OprJ is the outer membrane channel component of the MexCD-OprJ multidrug efflux complex.	resistance-nodulation-cell division (RND) antibiotic efflux pump	aminocoumarin antibiotic;aminoglycoside antibiotic;cephalosporin;diaminopyrimidine antibiotic;fluoroquinolone antibiotic;macrolide antibiotic;penam;phenicol antibiotic;tetracycline antibiotic	Multidrug	antibiotic efflux
3000803	MexE	MexE is the membrane fusion protein of the MexEF-OprN multidrug efflux complex.	resistance-nodulation-cell division (RND) antibiotic efflux pump	diaminopyrimidine antibiotic;fluoroquinolone antibiotic;phenicol antibiotic	Multidrug	antibiotic efflux
3000804	MexF	MexF is the multidrug inner membrane transporter of the MexEF-OprN complex. mexF corresponds to 2 loci in Pseudomonas aeruginosa PAO1 (gene name: mexF/mexB) and 4 loci in Pseudomonas aeruginosa LESB58 (gene name: mexD/mexB).	resistance-nodulation-cell division (RND) antibiotic efflux pump	diaminopyrimidine antibiotic;fluoroquinolone antibiotic;phenicol antibiotic	Multidrug	antibiotic efflux
3000805	OprN	OprN is the outer membrane channel component of the MexEF-OprN multidrug efflux complex.	resistance-nodulation-cell division (RND) antibiotic efflux pump	diaminopyrimidine antibiotic;fluoroquinolone antibiotic;phenicol antibiotic	Multidrug	antibiotic efflux
3000807	MexH	MexH is the membrane fusion protein of the efflux complex MexGHI-OpmD.	resistance-nodulation-cell division (RND) antibiotic efflux pump	acridine dye;fluoroquinolone antibiotic;tetracycline antibiotic	Multidrug	antibiotic efflux
3000808	MexI	MexI is the inner membrane transporter of the efflux complex MexGHI-OpmD.	resistance-nodulation-cell division (RND) antibiotic efflux pump	acridine dye;fluoroquinolone antibiotic;tetracycline antibiotic	Multidrug	antibiotic efflux
3000809	OpmD	OpmD is the outer membrane channel protein of the efflux complex MexGHI-OpmD.	resistance-nodulation-cell division (RND) antibiotic efflux pump	acridine dye;fluoroquinolone antibiotic;tetracycline antibiotic	Multidrug	antibiotic efflux
3000810	mtrC	MtrC is the membrane fusion protein of the MtrCDE multidrug efflux complex.	resistance-nodulation-cell division (RND) antibiotic efflux pump	macrolide antibiotic;penam	Multidrug	antibiotic efflux
3000811	mtrD	MtrD is the inner membrane multidrug transporter of the MtrCDE efflux complex.	resistance-nodulation-cell division (RND) antibiotic efflux pump	macrolide antibiotic;penam	Multidrug	antibiotic efflux
3000812	mtrE	MtrE is an outer membrane exporter protein that is part of the MtrCDE multidrug efflux complex.	resistance-nodulation-cell division (RND) antibiotic efflux pump	macrolide antibiotic;penam	Multidrug	antibiotic efflux
3000815	mgrA	MgrA, also known as NorR, is a regulator for norA, norB, and tet38. It is a positive regulator for norA expression, but is a direct repressor for norB and an indirect repressor of tet38.	ATP-binding cassette (ABC) antibiotic efflux pump;major facilitator superfamily (MFS) antibiotic efflux pump	acridine dye;cephalosporin;fluoroquinolone antibiotic;penam;peptide antibiotic;tetracycline antibiotic	Multidrug	antibiotic efflux
3000816	mtrA	MtrA is a transcriptional activator of the MtrCDE multidrug efflux pump of Neisseria gonorrhoeae.	resistance-nodulation-cell division (RND) antibiotic efflux pump	macrolide antibiotic;penam	Multidrug	antibiotic efflux
3000822	pmrA	PmrA is a MFS-type efflux pump expressed in Streptococcus pneumoniae that confers low-level resistance to norfloxacin, ciprofloxacin, and acriflavine.	major facilitator superfamily (MFS) antibiotic efflux pump	fluoroquinolone antibiotic	Fluoroquinolone	antibiotic efflux
3000823	ramA	RamA (resistance antibiotic multiple) is a positive regulator of AcrAB-TolC and leads to high level multidrug resistance in Klebsiella pneumoniae, Salmonella enterica, and Enterobacter aerugenes, increasing the expression of both the mar operon as well as AcrAB. RamA also decreases OmpF expression.	General Bacterial Porin with reduced permeability to beta-lactams;resistance-nodulation-cell division (RND) antibiotic efflux pump	carbapenem;cephalosporin;cephamycin;fluoroquinolone antibiotic;glycylcycline;monobactam;penam;penem;phenicol antibiotic;rifamycin antibiotic;tetracycline antibiotic;triclosan	Multidrug	antibiotic efflux;reduced permeability to antibiotic
3000826	sdiA	SdiA is a cell division regulator that is also a positive regulator of AcrAB only when it's expressed from a plasmid. When the sdiA gene is on the chromosome, it has no effect on expression of acrAB	resistance-nodulation-cell division (RND) antibiotic efflux pump	cephalosporin;fluoroquinolone antibiotic;glycylcycline;penam;phenicol antibiotic;rifamycin antibiotic;tetracycline antibiotic;triclosan	Multidrug	antibiotic efflux
3000828	baeR	BaeR is a response regulator that promotes the expression of MdtABC and AcrD efflux complexes.	resistance-nodulation-cell division (RND) antibiotic efflux pump	aminocoumarin antibiotic;aminoglycoside antibiotic	Multidrug	antibiotic efflux
3000829	baeS	BaeS is a sensor kinase in the BaeSR regulatory system. While it phosphorylates BaeR to increase its activity, BaeS is not necessary for overexpressed BaeR to confer resistance.	resistance-nodulation-cell division (RND) antibiotic efflux pump	aminocoumarin antibiotic;aminoglycoside antibiotic	Multidrug	antibiotic efflux
3000830	cpxA	CpxA is a membrane-localized sensor kinase that is activated by envelope stress. It starts a kinase cascade that activates CpxR, which promotes efflux complex expression.	resistance-nodulation-cell division (RND) antibiotic efflux pump	aminocoumarin antibiotic;aminoglycoside antibiotic	Multidrug	antibiotic efflux
3000832	evgA	EvgA, when phosphorylated, is a positive regulator for efflux protein complexes emrKY and mdtEF. While usually phosphorylated in a EvgS dependent manner, it can be phosphorylated in the absence of EvgS when overexpressed.	major facilitator superfamily (MFS) antibiotic efflux pump;resistance-nodulation-cell division (RND) antibiotic efflux pump	fluoroquinolone antibiotic;macrolide antibiotic;penam;tetracycline antibiotic	Multidrug	antibiotic efflux
3000833	evgS	EvgS is a sensor protein that phosphorylates the regulatory protein EvgA. evgS corresponds to 1 locus in Pseudomonas aeruginosa PAO1 and 1 locus in Pseudomonas aeruginosa LESB58.	major facilitator superfamily (MFS) antibiotic efflux pump;resistance-nodulation-cell division (RND) antibiotic efflux pump	fluoroquinolone antibiotic;macrolide antibiotic;penam;tetracycline antibiotic	Multidrug	antibiotic efflux
3000838	arlR	ArlR is a response regulator that binds to the norA promoter to activate expression. ArlR must first be phosphorylated by ArlS.	major facilitator superfamily (MFS) antibiotic efflux pump	acridine dye;fluoroquinolone antibiotic	Multidrug	antibiotic efflux
3000839	arlS	ArlS is a protein histidine kinase that phosphorylates ArlR, a promoter for norA expression.	major facilitator superfamily (MFS) antibiotic efflux pump	acridine dye;fluoroquinolone antibiotic	Multidrug	antibiotic efflux
3000847	KHM-1	KHM-1 is a plasmid-mediated metallo-beta-lactamase found in Citrobacter freundii that confers resistance to all broad-spectrum beta-lactams, execpt for monobactams.	KHM beta-latamase	carbapenem;cephalosporin;cephamycin;penam;penem	Beta-lactam	antibiotic inactivation
3000850	GOB-1	GOB-1 confers resistance to cephalosporins in Elizabethkingia (Chryseobacterium) meningoseptica.	GOB beta-lactamase	carbapenem;cephalosporin;penam	Beta-lactam	antibiotic inactivation
3000851	THIN-B	THIN-B, isolated from Janthinobacterium lividum, hydrolyzes a broad spectrum of beta-lactams including penicillins, cephalosporins, and carbapenems.	THIN-B beta-lactamase	carbapenem;cephalosporin;penam	Beta-lactam	antibiotic inactivation
3000853	AIM-1	AIM-1 is an Ambler class B beta-lactamase that hydrolyzes most beta-lactams except aztreonam and ceftazidime. It was isolated from Pseudomonas aeruginosa and was the first subclass B3 mobile-elements encoded beta-lactamase discovered.	AIM beta-lactamase	cephalosporin;cephamycin;penam	Beta-lactam	antibiotic inactivation
3000854	SMB-1	SMB-1 can hydrolyze a variety of beta-lactams, including penicillins, cephalosporins, and carbapenems. It was identified in Serratia marcescens.	SMB beta-lactamase	carbapenem;cephalosporin;penam	Beta-lactam	antibiotic inactivation
3000855	CAU-1	CAU-1 is a B3 metallo-beta-lactamase that is encoded by the Caulobacter crescentus chromosome	CAU beta-lactamase	carbapenem;penam	Beta-lactam	antibiotic inactivation
3000856	BJP-1	BJP-1 is a subclass B3 ortholog found in Bradyrhizobium japonicum that hydrolyzes most beta-lactams except aztreonam, ticarcillin, and temocillin.	BJP beta-lactamase	carbapenem	Beta-lactam	antibiotic inactivation
3000865	oleD	OleD is a glycotransferase found in Streptomyces antibioticus, a natural producer of oleandomycin. OleD can glycosylate a wide range of macrolides. Unlike oleI, oleD is not found in the oleandomycin biosynthetic cluster.	ole glycosyltransferase	macrolide antibiotic	MLS	antibiotic inactivation
3000866	oleI	OleI is a glycosyltransferase found in Streptomyces antibioticus, specifically the oleandomycin biosynthetic cluster. OleI glycosylates oleandomycin to confer self-resistance.	ole glycosyltransferase	macrolide antibiotic	MLS	antibiotic inactivation
3000910	TEM-40	TEM-40 is an inhibitor-resistant beta-lactamase that has been found in clinical isolates.	TEM beta-lactamase	cephalosporin;monobactam;penam;penem	Beta-lactam	antibiotic inactivation
3000926	TEM-57	TEM-57 is a broad-spectrum beta-lactamase found in E. coli.	TEM beta-lactamase	cephalosporin;monobactam;penam;penem	Beta-lactam	antibiotic inactivation
3001145	SHV-93	SHV-93 is a beta-lactamase found in Klebsiella pneumoniae.	SHV beta-lactamase	carbapenem;cephalosporin;penam	Beta-lactam	antibiotic inactivation
3001205	BRP(MBL)	A novel bleomycin resistance protein encoded by a metallo-beta-lactamase-associated ble gene. Expression of BRP(MBL) confers resistance to bleomycin and bleomycin-like antibiotics in Enterobacteriaceae and Acinetobacter, where it is co-expressed with an MBL and controlled by the same promoter region.	Bleomycin resistant protein	glycopeptide antibiotic	Glycopeptide	antibiotic inactivation
3001209	mecC	A foreign PBP2a acquired by lateral gene transfer that able to perform peptidoglycan synthesis in the presence of beta-lactams.	methicillin resistant PBP2	carbapenem;cephalosporin;cephamycin;monobactam;penam	Beta-lactam	antibiotic target replacement
3001214	mdtM	Multidrug resistance protein MdtM	major facilitator superfamily (MFS) antibiotic efflux pump	acridine dye;fluoroquinolone antibiotic;lincosamide antibiotic;nucleoside antibiotic;phenicol antibiotic	Multidrug	antibiotic efflux
3001216	mdtH	Multidrug resistance protein MdtH	major facilitator superfamily (MFS) antibiotic efflux pump	fluoroquinolone antibiotic	Multidrug	antibiotic efflux
3001265	Erm(30)	Erm(30) confers a MLSb resistant phenotype. Along with erm(31), these genes are responsible for self-resistance in the pikromycin/narbomycin/methymycin/neomethymycin producer, Streptomyces venezuelae.	Erm 23S ribosomal RNA methyltransferase	lincosamide antibiotic;macrolide antibiotic;streptogramin antibiotic	MLS	antibiotic target alteration
3001299	tlrB conferring tylosin resistance	TlrB is a methyltransferase found in Streptomyces fradiae and confers resistance to mycinamicin, tylosin and lincosamides. Specifically, this enzyme adds a methyl group to guanosine 748 (E. coli numbering). TlrB is found in the tylosin biosynthetic cluster and is one mechanism by which S. fradiae protects itself from self-destruction when producing this macrolide.	non-erm 23S ribosomal RNA methyltransferase (G748)	lincosamide antibiotic;macrolide antibiotic	MLS	antibiotic target alteration
3001300	myrA	myrA is a methyltransferase found in Micromonospora griseorubida and confers resistance to mycinamicin, tylosin and lincosamides. Specifically, this enzyme adds a methyl group to guanosine 748 (E. coli numbering) of 23S ribosomal RNA. MyrA is found in the mycinamicin biosynthetic cluster and is one mechanism by which M. griseorubida protects itself from self-destruction when producing this macrol…	non-erm 23S ribosomal RNA methyltransferase (G748)	lincosamide antibiotic;macrolide antibiotic	MLS	antibiotic target alteration
3001301	RlmA(II)	RlmA(II) is a methyltransferase found in Streptococcus pneumoniae and confers resistance to mycinamicin, tylosin and lincosamides. Specifically, this enzyme adds a methyl group to guanosine 748 (E. coli numbering) of 23S ribosomal RNA.	non-erm 23S ribosomal RNA methyltransferase (G748)	lincosamide antibiotic;macrolide antibiotic	MLS	antibiotic target alteration
3001302	chrB	ChrB is a methyltransferase found in Streptomyces bikiniensis and confers resistance to chalcomycin, mycinamicin, tylosin and lincosamides. Specifically, this enzyme adds a methyl group to guanosine 748 (E. coli numbering). chrB is found in the chalcomycin biosynthetic cluster and is responsible for self-resistance in S. bikiniensis.	non-erm 23S ribosomal RNA methyltransferase (G748)	lincosamide antibiotic;macrolide antibiotic	MLS	antibiotic target alteration
3001303	ErmO-srmA	ErmO (gene srmA) is a methyltransferase found in the spiramycin producer Streptomyces ambofaciens. Like other Erm enzymes, it catalyzes the methylation of A2058 of the 23S ribosomal RNA. Specifically, this enzyme transfers only one methyl group. The gene is responsible for self-resistance to spiramycin.	Erm 23S ribosomal RNA methyltransferase	lincosamide antibiotic;macrolide antibiotic;streptogramin antibiotic	MLS	antibiotic target alteration
3001304	ErmS	ErmS is a methyltransferase found in the tylosin producer Streptomyces fradiae. Like other Erm enzymes, it catalyzes the methylation of A2058 of the 23S ribosomal RNA. Specifically, this enzyme transfers two methyl groups. The gene is found within the tylosin biosynthetic cluster and is responsible for self-resistance	Erm 23S ribosomal RNA methyltransferase	lincosamide antibiotic;macrolide antibiotic;streptogramin antibiotic	MLS	antibiotic target alteration
3001306	ErmW	ErmW is a methyltransferase found in the mycinamicin producer Micromonospora griseorubida. Like other Erm enzymes, it catalyzes the methylation of A2058 of the 23S ribosomal RNA. The gene is found within the mycinamicin biosynthetic cluster and is responsible for self-resistance.	Erm 23S ribosomal RNA methyltransferase	lincosamide antibiotic;macrolide antibiotic;streptogramin antibiotic	MLS	antibiotic target alteration
3001313	facT	Efflux protein facT confers resistance to factumycin. The gene has been heterologously expressed in S. coelicolor and its function was confirmed (Thaker et al. Med. Chem. Commun. 2012, 3: 1020). It is possible that this gene can efflux other kirromycin-like elfamycins, but this has not been tested.	major facilitator superfamily (MFS) antibiotic efflux pump	elfamycin antibiotic	Elfamycin	antibiotic efflux
3001327	MdtK	A multidrug and toxic compound extrusions (MATE) transporter conferring resistance to norfloxacin, doxorubicin and acriflavine.	multidrug and toxic compound extrusion (MATE) transporter	fluoroquinolone antibiotic	Multidrug	antibiotic efflux
3001328	Escherichia coli mdfA	Multidrug efflux pump in E. coli. This multidrug efflux system was originally identified as the Cmr/CmlA chloramphenicol exporter.	major facilitator superfamily (MFS) antibiotic efflux pump	benzalkonium chloride;rhodamine;tetracycline antibiotic	Multidrug	antibiotic efflux
3001329	mdtG	The MdtG protein, also named YceE, appears to be a member of the major facilitator superfamily of transporters, and it has been reported, when overexpressed, to increase fosfomycin and deoxycholate resistances. mdtG is a member of the marA-soxS-rob regulon.	major facilitator superfamily (MFS) antibiotic efflux pump	fosfomycin	Fosfomycin	antibiotic efflux
3001396	OXA-1	OXA-1 is a beta-lactamase found in E. coli	OXA beta-lactamase	cephalosporin;penam	Beta-lactam	antibiotic inactivation
3001400	OXA-5	OXA-5 is a beta-lactamase found in P. aeruginosa and Enterobacteriaceae.	OXA beta-lactamase	cephalosporin;penam	Beta-lactam	antibiotic inactivation
3001458	OXA-153	OXA-153 is a beta-lactamase. From the Lahey list of OXA beta-lactamases.	OXA beta-lactamase	cephalosporin;penam	Beta-lactam	antibiotic inactivation
3001476	OXA-184	OXA-184 is a beta-lactamase. From the Lahey list of OXA beta-lactamases.	OXA beta-lactamase	cephalosporin;penam	Beta-lactam	antibiotic inactivation
3001502	OXA-256	OXA-256 is a beta-lactamase. From the Lahey list of OXA beta-lactamases.	OXA beta-lactamase	cephalosporin;penam	Beta-lactam	antibiotic inactivation
3001516	OXA-328	OXA-328 is a beta-lactamase. From the Lahey list of OXA beta-lactamases.	OXA beta-lactamase	cephalosporin;penam	Beta-lactam	antibiotic inactivation
3001544	OXA-357	OXA-357 is a beta-lactamase. From the Lahey list of OXA beta-lactamases.	OXA beta-lactamase	cephalosporin;penam	Beta-lactam	antibiotic inactivation
3001555	OXA-368	OXA-368 is a beta-lactamase found in Aeromonas sobria. From the Lahey list of OXA beta-lactamases.	OXA beta-lactamase	cephalosporin;penam	Beta-lactam	antibiotic inactivation
3001761	OXA-306	OXA-306 is a beta-lactamase found in Acinetobacter spp.	OXA beta-lactamase	cephalosporin;penam	Beta-lactam	antibiotic inactivation
3001773	OXA-61	OXA-61 is a beta-lactamase found in Campylobacter jejuni	OXA beta-lactamase	cephalosporin;penam	Beta-lactam	antibiotic inactivation
3001777	OXA-347	OXA-347 is a beta-lactamase found in Enterobacteriaceae	OXA beta-lactamase	cephalosporin;penam	Beta-lactam	antibiotic inactivation
3001780	OXA-85	OXA-85 is a beta-lactamase found in Fusobacterium nucleatum	OXA beta-lactamase	cephalosporin;penam	Beta-lactam	antibiotic inactivation
3001793	OXA-320	OXA-320 is a beta-lactamase found in Proteus mirabilis	OXA beta-lactamase	cephalosporin;penam	Beta-lactam	antibiotic inactivation
3001807	OXA-246	OXA-246 is a beta-lactamase found in Pseudomonas aeruginosa	OXA beta-lactamase	cephalosporin;penam	Beta-lactam	antibiotic inactivation
3001809	OXA-209	OXA-209 is a beta-lactamase found in Riemerella anatipestifer	OXA beta-lactamase	cephalosporin;penam	Beta-lactam	antibiotic inactivation
3001815	ACC-1	ACC-1 is a beta-lactamase found in Klebsiella pneumoniae	ACC beta-lactamase	cephalosporin;monobactam;penam	Beta-lactam	antibiotic inactivation
3001816	ACC-2	ACC-2 is a beta-lactamase found in Hafnia alvei	ACC beta-lactamase	cephalosporin;monobactam;penam	Beta-lactam	antibiotic inactivation
3001817	ACC-3	ACC-3 is a beta-lactamase found in Hafnia alvei	ACC beta-lactamase	cephalosporin;monobactam;penam	Beta-lactam	antibiotic inactivation
3001818	ACC-4	ACC-4 is a beta-lactamase found in Escherichia coli	ACC beta-lactamase	cephalosporin;monobactam;penam	Beta-lactam	antibiotic inactivation
3001819	ACC-5	ACC-5 is a beta-lactamase. From the Lahey list of ACC beta-lactamases. It is detected among Gram-negative bacteria isolates (Gamma- and Alpha-proteobacteria) from urban water sources.	ACC beta-lactamase	cephalosporin;monobactam;penam	Beta-lactam	antibiotic inactivation
3001824	ACT-5	ACT-5 is a beta-lactamase found in Escherichia coli	ACT beta-lactamase	carbapenem;cephalosporin;cephamycin;penam	Beta-lactam	antibiotic inactivation
3001826	ACT-9	ACT-9 is a beta-lactamase found in Pantoea agglomerans	ACT beta-lactamase	carbapenem;cephalosporin;cephamycin;penam	Beta-lactam	antibiotic inactivation
3001828	ACT-23	ACT-23 is a beta-lactamase found in Escherichia coli	ACT beta-lactamase	carbapenem;cephalosporin;cephamycin;penam	Beta-lactam	antibiotic inactivation
3001834	ACT-12	ACT-12 is a beta-lactamase. From the Lahey list of ACT beta-lactamases.	ACT beta-lactamase	carbapenem;cephalosporin;cephamycin;penam	Beta-lactam	antibiotic inactivation
3001840	ACT-19	ACT-19 is a beta-lactamase. From the Lahey list of ACT beta-lactamases.	ACT beta-lactamase	carbapenem;cephalosporin;cephamycin;penam	Beta-lactam	antibiotic inactivation
3001841	ACT-20	ACT-20 is a beta-lactamase. From the Lahey list of ACT beta-lactamases.	ACT beta-lactamase	carbapenem;cephalosporin;cephamycin;penam	Beta-lactam	antibiotic inactivation
3001850	ACT-30	ACT-30 is a beta-lactamase. From the Lahey list of ACT beta-lactamases.	ACT beta-lactamase	carbapenem;cephalosporin;cephamycin;penam	Beta-lactam	antibiotic inactivation
3001871	CTX-M-8	CTX-M-8 is a beta-lactamase found in the Enterobacteriaceae family	CTX-M beta-lactamase	cephalosporin	Beta-lactam	antibiotic inactivation
3001900	CTX-M-38	CTX-M-38 is a beta-lactamase found in Escherichia coli	CTX-M beta-lactamase	cephalosporin	Beta-lactam	antibiotic inactivation
3001926	CTX-M-65	CTX-M-65 is a beta-lactamase found in Escherichia coli	CTX-M beta-lactamase	cephalosporin	Beta-lactam	antibiotic inactivation
3002012	CMY-1	CMY-1 is a beta-lactamase found in the Enterobacteriaceae family	CMY beta-lactamase	cephamycin	Beta-lactam	antibiotic inactivation
3002019	CMY-8	CMY-8 is a beta-lactamase found in Klebsiella pneumoniae	CMY beta-lactamase	cephamycin	Beta-lactam	antibiotic inactivation
3002028	CMY-17	CMY-17 is a beta-lactamase. From the Lahey list of CMY beta-lactamases.	CMY beta-lactamase	cephamycin	Beta-lactam	antibiotic inactivation
3002062	CMY-51	CMY-51 is a beta-lactamase. From the Lahey list of CMY beta-lactamases.	CMY beta-lactamase	cephamycin	Beta-lactam	antibiotic inactivation
3002073	CMY-60	CMY-60 is a beta-lactamase. From the Lahey list of CMY beta-lactamases.	CMY beta-lactamase	cephamycin	Beta-lactam	antibiotic inactivation
3002086	CMY-73	CMY-73 is a beta-lactamase. From the Lahey list of CMY beta-lactamases.	CMY beta-lactamase	cephamycin	Beta-lactam	antibiotic inactivation
3002111	CMY-98	CMY-98 is a beta-lactamase. From the Lahey list of CMY beta-lactamases.	CMY beta-lactamase	cephamycin	Beta-lactam	antibiotic inactivation
3002127	CMY-116	CMY-116 is a beta-lactamase. From the Lahey list of CMY beta-lactamases.	CMY beta-lactamase	cephamycin	Beta-lactam	antibiotic inactivation
3002133	DHA-2	DHA-2 is a beta-lactamase found in Klebsiella pneumoniae	DHA beta-lactamase	cephalosporin;cephamycin	Beta-lactam	antibiotic inactivation
3002135	DHA-6	DHA-6 is a beta-lactamase found in the Enterobacteriaceae family	DHA beta-lactamase	cephalosporin;cephamycin	Beta-lactam	antibiotic inactivation
3002140	DHA-9	DHA-9 is a beta-lactamase. From the Lahey list of DHA beta-lactamases.	DHA beta-lactamase	cephalosporin;cephamycin	Beta-lactam	antibiotic inactivation
3002141	DHA-10	DHA-10 is a beta-lactamase. From the Lahey list of DHA beta-lactamases.	DHA beta-lactamase	cephalosporin;cephamycin	Beta-lactam	antibiotic inactivation
3002143	DHA-12	DHA-12 is a beta-lactamase. From the Lahey list of DHA beta-lactamases.	DHA beta-lactamase	cephalosporin;cephamycin	Beta-lactam	antibiotic inactivation
3002144	DHA-13	DHA-13 is a beta-lactamase. From the Lahey list of DHA beta-lactamases.	DHA beta-lactamase	cephalosporin;cephamycin	Beta-lactam	antibiotic inactivation
3002146	DHA-15	DHA-15 is a beta-lactamase. From the Lahey list of DHA beta-lactamases.	DHA beta-lactamase	cephalosporin;cephamycin	Beta-lactam	antibiotic inactivation
3002147	DHA-16	DHA-16 is a beta-lactamase. From the Lahey list of DHA beta-lactamases.	DHA beta-lactamase	cephalosporin;cephamycin	Beta-lactam	antibiotic inactivation
3002149	DHA-18	DHA-18 is a beta-lactamase. From the Lahey list of DHA beta-lactamases.	DHA beta-lactamase	cephalosporin;cephamycin	Beta-lactam	antibiotic inactivation
3002150	DHA-19	DHA-19 is a beta-lactamase. From the Lahey list of DHA beta-lactamases.	DHA beta-lactamase	cephalosporin;cephamycin	Beta-lactam	antibiotic inactivation
3002151	DHA-20	DHA-20 is a beta-lactamase. From the Lahey list of DHA beta-lactamases.	DHA beta-lactamase	cephalosporin;cephamycin	Beta-lactam	antibiotic inactivation
3002153	DHA-22	DHA-22 is a beta-lactamase. From the Lahey list of DHA beta-lactamases.	DHA beta-lactamase	cephalosporin;cephamycin	Beta-lactam	antibiotic inactivation
3002155	FOX-1	FOX-1 is a beta-lactamase found in Klebsiella pneumoniae	FOX beta-lactamase	cephalosporin;cephamycin	Beta-lactam	antibiotic inactivation
3002158	FOX-4	FOX-4 is a beta-lactamase found in Escherichia coli	FOX beta-lactamase	cephalosporin;cephamycin	Beta-lactam	antibiotic inactivation
3002163	FOX-9	FOX-9 is a beta-lactamase. From the Lahey list of FOX beta-lactamases.	FOX beta-lactamase	cephalosporin;cephamycin	Beta-lactam	antibiotic inactivation
3002182	MOX-1	MOX-1 is a beta-lactamase found in Klebsiella pneumoniae	MOX beta-lactamase	cephalosporin;cephamycin;penam	Beta-lactam	antibiotic inactivation
3002183	MOX-2	MOX-2 is a beta-lactamase found in Klebsiella pneumoniae	MOX beta-lactamase	cephalosporin;cephamycin;penam	Beta-lactam	antibiotic inactivation
3002185	MOX-6	MOX-6 is a beta-lactamase found in Klebsiella pneumoniae	MOX beta-lactamase	cephalosporin;cephamycin;penam	Beta-lactam	antibiotic inactivation
3002191	MOX-9	MOX-9 is a beta-lactamase found in Citrobacter freundii.	MOX beta-lactamase	cephalosporin;cephamycin;penam	Beta-lactam	antibiotic inactivation
3002242	CARB-3	CARB-3 is a beta-lactamase found in Pseudomonas aeruginosa	CARB beta-lactamase	penam	Beta-lactam	antibiotic inactivation
3002324	KPC-14	KPC-14 is a beta-lactamase. From the Lahey list of KPC beta-lactamases.	KPC beta-lactamase	carbapenem;cephalosporin;monobactam;penam	Beta-lactam	antibiotic inactivation
3002364	PER-2	PER-2 is a beta-lactamase found in Salmonella typhimurium	PER beta-lactamase	carbapenem;cephalosporin;monobactam;penam;penem	Beta-lactam	antibiotic inactivation
3002365	PER-3	PER-3 is a beta-lactamase found in Aeromonas spp.	PER beta-lactamase	carbapenem;cephalosporin;monobactam;penam;penem	Beta-lactam	antibiotic inactivation
3002368	PER-6	PER-6 is a beta-lactamase found in Aeromonas allosaccharophila	PER beta-lactamase	carbapenem;cephalosporin;monobactam;penam;penem	Beta-lactam	antibiotic inactivation
3002369	PER-7	PER-7 is a beta-lactamase found in Acinetobacter baumannii	PER beta-lactamase	carbapenem;cephalosporin;monobactam;penam;penem	Beta-lactam	antibiotic inactivation
3002371	VEB-2	VEB-2 is a beta-lactamase found in Pseudomonas aeruginosa	VEB beta-lactamase	cephalosporin;monobactam	Beta-lactam	antibiotic inactivation
3002372	VEB-3	VEB-3 is a beta-lactamase found in Enterobacter cloacae	VEB beta-lactamase	cephalosporin;monobactam	Beta-lactam	antibiotic inactivation
3002376	VEB-7	VEB-7 is a beta-lactamase. From the Lahey list of VEB beta-lactamases.	VEB beta-lactamase	cephalosporin;monobactam	Beta-lactam	antibiotic inactivation
3002377	VEB-8	VEB-8 is a beta-lactamase. From the Lahey list of VEB beta-lactamases.	VEB beta-lactamase	cephalosporin;monobactam	Beta-lactam	antibiotic inactivation
3002378	VEB-9	VEB-9 is a beta-lactamase. From the Lahey list of VEB beta-lactamases.	VEB beta-lactamase	cephalosporin;monobactam	Beta-lactam	antibiotic inactivation
3002483	LRA-5	LRA-5 is a beta-lactamase isolated from soil samples in Alaska	class A LRA beta-lactamase	cephalosporin;penam	Beta-lactam	antibiotic inactivation
3002484	LRA-13	LRA-13 is a class D/class C fusion bifunctional beta-lactamase isolated from soil samples in Alaska.	class C LRA beta-lactamase;class D LRA beta-lactamase	cephalosporin;penam	Beta-lactam	antibiotic inactivation
3002485	LRA-2	LRA-2 is a beta-lactamase isolated from soil samples in Alaska	subclass B3 LRA beta-lactamase	cephalosporin;penam	Beta-lactam	antibiotic inactivation
3002486	LRA-7	LRA-7 is a beta-lactamase isolated from soil samples in Alaska	subclass B3 LRA beta-lactamase	cephalosporin;penam	Beta-lactam	antibiotic inactivation
3002487	LRA-8	LRA-8 is a beta-lactamase isolated from soil samples in Alaska	subclass B3 LRA beta-lactamase	cephalosporin;penam	Beta-lactam	antibiotic inactivation
3002488	LRA-9	LRA-9 is a beta-lactamase isolated from soil samples in Alaska	subclass B3 LRA beta-lactamase	cephalosporin;penam	Beta-lactam	antibiotic inactivation
3002489	LRA-10	LRA-10 is a beta-lactamase isolated from soil samples in Alaska	class C LRA beta-lactamase	cephalosporin;penam	Beta-lactam	antibiotic inactivation
3002492	LRA-18	LRA-18 is a beta-lactamase isolated from soil samples in Alaska	class C LRA beta-lactamase	cephalosporin;penam	Beta-lactam	antibiotic inactivation
3002493	SRT-1	SRT-1, isolated from Serratia marcescens, confers resistance to cephalosporins but not carbapenems, penems and monobactams.	SRT beta-lactamase	cephalosporin	Beta-lactam	antibiotic inactivation
3002494	SRT-2	SRT-2, isolated from Serratia marcescens, is a chromosomal beta-lactamase that confers resistance to cefotaxime	SRT beta-lactamase	cephalosporin	Beta-lactam	antibiotic inactivation
3002498	PDC-2	PDC-2 is a extended-spectrum beta-lactamase found in Pseudomonas aeruginosa.	PDC beta-lactamase	carbapenem;cephalosporin;monobactam	Beta-lactam	antibiotic inactivation
3002506	PDC-7	PDC-7 is a extended-spectrum beta-lactamase found in Pseudomonas aeruginosa.	PDC beta-lactamase	carbapenem;cephalosporin;monobactam	Beta-lactam	antibiotic inactivation
3002507	PDC-8	PDC-8 is a extended-spectrum beta-lactamase found in Pseudomonas aeruginosa.	PDC beta-lactamase	carbapenem;cephalosporin;monobactam	Beta-lactam	antibiotic inactivation
3002510	LRA-3	LRA-3 is a beta-lactamase isolated from soil samples in Alaska	subclass B3 LRA beta-lactamase	cephalosporin;penam	Beta-lactam	antibiotic inactivation
3002511	LRA-12	LRA-12 is a beta-lactamase isolated from soil samples in Alaska	subclass B3 LRA beta-lactamase	cephalosporin;penam	Beta-lactam	antibiotic inactivation
3002512	LRA-17	LRA-17 is a beta-lactamase isolated from soil samples in Alaska	subclass B3 LRA beta-lactamase	cephalosporin;penam	Beta-lactam	antibiotic inactivation
3002513	LRA-19	LRA-19 is a beta-lactamase isolated from soil samples in Alaska	subclass B3 LRA beta-lactamase	cephalosporin;penam	Beta-lactam	antibiotic inactivation
3002515	OCH-2	OCH-2 beta-lactamase is an Ambler class C chromosomal-encoded beta-lactamases in Ochrobactrum anthropi	OCH beta-lactamase	cephalosporin;cephamycin;monobactam;penam;penem	Beta-lactam	antibiotic inactivation
3002522	novA	A type III ABC transporter, identified on the novobiocin biosynthetic gene cluster, involved in the transport and resistance of novobiocin.	ATP-binding cassette (ABC) antibiotic efflux pump	aminocoumarin antibiotic	Aminocoumarin	antibiotic efflux
3002528	AAC(3)-Ia	AAC(3)-Ia is an aminoglycoside acetyltransferase encoded by plasmids, transposons, integrons in S. marcescens, E. coli, Acinetobacter baumannii, Klebsiella pneumoniae, Klebsiella oxytoca, P. aeruginosa, Salmonella typhimurium and Proteus mirabilis	AAC(3)	aminoglycoside antibiotic	Aminoglycoside	antibiotic inactivation
3002531	AAC(3)-Ic	AAC(3)-Ic is an integron-encoded aminoglycoside acetyltransferase in P. aeruginosa	AAC(3)	aminoglycoside antibiotic	Aminoglycoside	antibiotic inactivation
3002533	AAC(3)-IIa	AAC(3)-IIa is a plasmid-encoded aminoglycoside acetyltransferase in K. pneumoniae, E. cloacae, Actinobacillus pleuropneumoniae, S. typhimurium, Citrobacter freundii, and P. aeruginosa.	AAC(3)	aminoglycoside antibiotic	Aminoglycoside	antibiotic inactivation
3002534	AAC(3)-IIb	AAC(3)-IIb is an aminoglycoside acetyltransferase in E. coli, A. faecalis and S. marcescens	AAC(3)	aminoglycoside antibiotic	Aminoglycoside	antibiotic inactivation
3002535	AAC(3)-IIc	AAC(3)-IIc is a plasmid-encoded aminoglycoside acetyltransferase in E. coli and P. aeruginosa	AAC(3)	aminoglycoside antibiotic	Aminoglycoside	antibiotic inactivation
3002536	AAC(3)-IIIa	AAC(3)-IIIa is a chromosomal-encoded aminoglycoside acetyltransferase in P. aeruginosa	AAC(3)	aminoglycoside antibiotic	Aminoglycoside	antibiotic inactivation
3002537	AAC(3)-IIIb	AAC(3)-IIIb is an aminoglycoside acetyltransferase in P. aeruginosa	AAC(3)	aminoglycoside antibiotic	Aminoglycoside	antibiotic inactivation
3002538	AAC(3)-IIIc	AAC(3)-IIIc is an aminoglycoside acetyltransferase in P. aeruginosa	AAC(3)	aminoglycoside antibiotic	Aminoglycoside	antibiotic inactivation
3002539	AAC(3)-IV	AAC(3)-IV is a plasmid-encoded aminoglycoside acetyltransferase in E. coli, C. jejuni and P. stutzeri	AAC(3)	aminoglycoside antibiotic	Aminoglycoside	antibiotic inactivation
3002541	AAC(3)-VIIa	AAC(3)-VIIa is a chromosomal-encoded aminoglycoside acetyltransferase in Streptomyces rimosus	AAC(3)	aminoglycoside antibiotic	Aminoglycoside	antibiotic inactivation
3002542	AAC(3)-VIIIa	AAC(3)-VIIIa is a chromosomal-encoded aminoglycoside acetyltransferase in Streptomyces fradiae	AAC(3)	aminoglycoside antibiotic	Aminoglycoside	antibiotic inactivation
3002543	AAC(3)-IXa	AAC(3)-IXa is a chromosomal-encoded aminoglycoside acetyltransferase in Micromonospora chalcea	AAC(3)	aminoglycoside antibiotic	Aminoglycoside	antibiotic inactivation
3002544	AAC(3)-Xa	AAC(3)-Xa is a chromosomal-encoded aminoglycoside acetyltransferase in Streptomyces griseus	AAC(3)	aminoglycoside antibiotic	Aminoglycoside	antibiotic inactivation
3002545	AAC(6')-Ia	AAC(6')-Ia is an aminoglycoside acetyltransferase encoded by plasmids, transposons, integrons in Citrobacter diversus, E. coli, K. pneumoniae, Shigella sonnei, and P. aeruginosa.	AAC(6')	aminoglycoside antibiotic	Aminoglycoside	antibiotic inactivation
3002546	AAC(6')-Ib	AAC(6')-Ib is an aminoglycoside acetyltransferase encoded by plasmids, transposons, integrons in K. pneumoniae, P. mirabilis, P. aeruginosa, S. enterica, K. oxytoca, S. maltophilia, E. cloacae and V. cholerae	AAC(6')	aminoglycoside antibiotic	Aminoglycoside	antibiotic inactivation
3002547	AAC(6')-Ib-cr	AAC(6')-Ib-cr is an aminoglycoside acetyltransferase encoded by plasmids, transposons, integrons in Enterobacteriaceae. The aac(6')-Ib-cr variant gene can induce resistance against aminoglycoside and fluoroquinolone simultaneously	AAC(6')	aminoglycoside antibiotic;fluoroquinolone antibiotic	Multidrug	antibiotic inactivation
3002554	AAC(6')-Ig	AAC(6')-Ig is a chromosomal-encoded aminoglycoside acetyltransferase in Acinetobacter haemolyticus	AAC(6')	aminoglycoside antibiotic	Aminoglycoside	antibiotic inactivation
3002556	AAC(6')-Ii	AAC(6')-Ii is a chromosomal-encoded aminoglycoside acetyltransferase in Enterococcus spp.	AAC(6')	aminoglycoside antibiotic	Aminoglycoside	antibiotic inactivation
3002558	AAC(6')-Ik	AAC(6')-Ik is a chromosomal-encoded aminoglycoside acetyltransferase in Acinetobacter sp.	AAC(6')	aminoglycoside antibiotic	Aminoglycoside	antibiotic inactivation
3002559	AAC(6')-Ip	AAC(6')-Ip is an aminoglycoside acetyltransferase encoded by plasmids and integrons in C. freundii, E. coli, E. faecium and Klebsiella aerogenes	AAC(6')	aminoglycoside antibiotic	Aminoglycoside	antibiotic inactivation
3002560	AAC(6')-Iq	AAC(6')-Iq is a aminoglycoside acetyltransferase encoded by plasmids and integrons in K. pneumoniae	AAC(6')	aminoglycoside antibiotic	Aminoglycoside	antibiotic inactivation
3002561	AAC(6')-Ir	AAC(6')-Ir is a chromosomal-encoded aminoglycoside acetyltransferase in Acinetobacter colistiniresistens	AAC(6')	aminoglycoside antibiotic	Aminoglycoside	antibiotic inactivation
3002563	AAC(6')-Isa	AAC(6')-Isa is a plasmid-encoded aminoglycoside acetyltransferase in Streptomyces albulus	AAC(6')	aminoglycoside antibiotic	Aminoglycoside	antibiotic inactivation
3002567	AAC(6')-Iw	AAC(6')-Iw is a chromosomal-encoded aminoglycoside acetyltransferase in Acinetobacter sp.	AAC(6')	aminoglycoside antibiotic	Aminoglycoside	antibiotic inactivation
3002568	AAC(6')-Ix	AAC(6')-Ix is a chromosomal-encoded aminoglycoside acetyltransferase in Acinetobacter sp.	AAC(6')	aminoglycoside antibiotic	Aminoglycoside	antibiotic inactivation
3002569	AAC(6')-Iy	AAC(6')-Iy is a chromosomal-encoded aminoglycoside acetyltransferase in S. enteritidis and S. enterica. Regulatory mutation required to increase expression of this chromosomally-encoded gene for resistance. In the specific system, aminoglycoside resistance was due to a transcriptional fusion secondary to a chromosomal deletion in which the downstream aac(6')-Iy gene was placed under the control o…	AAC(6')	aminoglycoside antibiotic	Aminoglycoside	antibiotic inactivation
3002570	AAC(6')-Iz	AAC(6')-Iz is a chromosomal-encoded aminoglycoside acetyltransferase in S. maltophilia	AAC(6')	aminoglycoside antibiotic	Aminoglycoside	antibiotic inactivation
3002572	AAC(6')-Iad	AAC(6')-Iad is a plasmid-encoded aminoglycoside acetyltransferase in Acinetobacter genomosp. 3	AAC(6')	aminoglycoside antibiotic	Aminoglycoside	antibiotic inactivation
3002578	AAC(6')-Ib7	AAC(6')-Ib7 is a plasmid-encoded aminoglycoside acetyltransferase in E. cloacae and C. freundii	AAC(6')	aminoglycoside antibiotic	Aminoglycoside	antibiotic inactivation
3002579	AAC(6')-Ib8	AAC(6')-Ib8 is a plasmid-encoded aminoglycoside acetyltransferase in E. cloacae	AAC(6')	aminoglycoside antibiotic	Aminoglycoside	antibiotic inactivation
3002587	AAC(6')-33	AAC(6')-33 is an integron-encoded aminoglycoside acetyltransferase in P. aeruginosa	AAC(6')	aminoglycoside antibiotic	Aminoglycoside	antibiotic inactivation
3002588	AAC(6')-I30	AAC(6')-I30 is an integron-encoded aminoglycoside acetyltransferase in S. enterica	AAC(6')	aminoglycoside antibiotic	Aminoglycoside	antibiotic inactivation
3002589	AAC(6')-Iid	AAC(6')-Iid is a chromosomal-encoded aminoglycoside acetyltransferase in Enterococcus durans	AAC(6')	aminoglycoside antibiotic	Aminoglycoside	antibiotic inactivation
3002590	AAC(6')-Iih	AAC(6')-Iih is a chromosomal-encoded aminoglycoside acetyltransferase in Enterococcus hirae	AAC(6')	aminoglycoside antibiotic	Aminoglycoside	antibiotic inactivation
3002591	AAC(6')-Ib-Suzhou	AAC(6')-Ib-Suzhou is an aminoglycoside acetyltransferase in E. cloacae and K. pneumoniae	AAC(6')	aminoglycoside antibiotic	Aminoglycoside	antibiotic inactivation
3002593	AAC(6')-Ib-SK	AAC(6')-Ib-SK is a chromosomal-encoded aminoglycoside acetyltransferase in Streptomyces kanamyceticus	AAC(6')	aminoglycoside antibiotic	Aminoglycoside	antibiotic inactivation
3002595	AAC(6')-IIb	AAC(6')-IIb is an integron-encoded aminoglycoside acetyltransferase in P. fluorescens	AAC(6')	aminoglycoside antibiotic	Aminoglycoside	antibiotic inactivation
3002597	AAC(6')-Ie-APH(2'')-Ia	AAC(6')-Ie-APH(2'')-Ia is an aminoglycoside acetyltransferase encoded by plasmids and transposons in S. aureus, E. faecalis, E. faecium and Staphylococcus warneri	AAC(6');APH(2'')	aminoglycoside antibiotic	Aminoglycoside	antibiotic inactivation
3002600	AAC(3)-Ib/AAC(6')-Ib''	AAC(3)-Ib/AAC(6')-Ib'' is an integron-encoded aminoglycoside acetyltransferase in P. aeruginosa	AAC(3);AAC(6')	aminoglycoside antibiotic	Aminoglycoside	antibiotic inactivation
3002601	aadA	ANT(3'')-Ia is an aminoglycoside nucleotidyltransferase gene encoded by plasmids, transposons, integrons in Enterobacteriaceae, A. baumannii, P. aeruginosa and Vibrio cholerae	ANT(3'')	aminoglycoside antibiotic	Aminoglycoside	antibiotic inactivation
3002605	aadA5	aadA5 is an aminoglycoside nucleotidyltransferase gene encoded by plasmids, transposons and integrons in E. coli, K. pneumoniae, Kluyvera georgiana, P. aeruginosa and E. cloacae	ANT(3'')	aminoglycoside antibiotic	Aminoglycoside	antibiotic inactivation
3002607	aadA7	aadA7 is an integron-encoded aminoglycoside nucleotidyltransferase gene in V. fluvialis, P. aeruginosa, E. coli, V. cholerae and S. enterica	ANT(3'')	aminoglycoside antibiotic	Aminoglycoside	antibiotic inactivation
3002609	aadA9	aadA9 is a plasmid-encoded aminoglycoside nucleotidyltransferase gene in C. glutamicum	ANT(3'')	aminoglycoside antibiotic	Aminoglycoside	antibiotic inactivation
3002613	aadA13	aadA13 is an aminoglycoside nucleotidyltransferase gene encoded by plasmids and integrons in Pseudomonas rettgeri, P. aeruginosa, Y. enterocolitica and E. coli	ANT(3'')	aminoglycoside antibiotic	Aminoglycoside	antibiotic inactivation
3002614	aadA14	aadA14 is a plasmid-encoded aminoglycoside nucleotidyltransferase gene in Pasteurella multocida	ANT(3'')	aminoglycoside antibiotic	Aminoglycoside	antibiotic inactivation
3002616	aadA16	aadA16 is an aminoglycoside nucleotidyltransferase gene encoded by plasmids and integrons in E. coli, V. cholerae and K. pneumoniae	ANT(3'')	aminoglycoside antibiotic	Aminoglycoside	antibiotic inactivation
3002617	aadA17	aadA17 is an integron-encoded aminoglycoside nucleotidyltransferase gene in Aeromonas media	ANT(3'')	aminoglycoside antibiotic	Aminoglycoside	antibiotic inactivation
3002620	aadA23	aadA23 is an integron-encoded aminoglycoside nucleotidyltransferase gene in S. enterica	ANT(3'')	aminoglycoside antibiotic	Aminoglycoside	antibiotic inactivation
3002626	ANT(6)-Ia	ANT(6)-Ia is an aminoglycoside nucleotidyltransferase gene encoded by plasmids and chromosomes in Staphylococcus epidermidis, E. faecium, Streptococcus suis, S. aureus, E. faecalis and Streptococcus mitis	ANT(6)	aminoglycoside antibiotic	Aminoglycoside	antibiotic inactivation
3002627	aadK	aadK is a chromosomal-encoded aminoglycoside nucleotidyltransferase gene in B. subtilis and Bacillus spp.	ANT(6)	aminoglycoside antibiotic	Aminoglycoside	antibiotic inactivation
3002628	aad(6)	aad(6) is a plasmid-encoded aminoglycoside nucleotidyltransferase gene in E. faecalis and Streptococcus oralis	ANT(6)	aminoglycoside antibiotic	Aminoglycoside	antibiotic inactivation
3002629	ANT(6)-Ib	ANT(6)-Ib is an aminoglycoside nucleotidyltransferase gene encoded by transferable pathogenicity islands in C. fetus subsp. fetus and B. subtilis	ANT(6)	aminoglycoside antibiotic	Aminoglycoside	antibiotic inactivation
3002631	spd	spd is a plasmid-encoded aminoglycoside nucleotidyltransferase gene in S. aureus	ANT(9)	aminoglycoside antibiotic	Aminoglycoside	antibiotic inactivation
3002635	APH(2'')-IIa	APH(2'')-IIa is a chromosomal-encoded aminoglycoside phosphotransferase in E. faecium and E. coli	APH(2'')	aminoglycoside antibiotic	Aminoglycoside	antibiotic inactivation
3002636	APH(2'')-IIIa	APH(2'')-IIIa is a plasmid-encoded aminoglycoside phosphotransferase in Enterococcus gallinarum	APH(2'')	aminoglycoside antibiotic	Aminoglycoside	antibiotic inactivation
3002639	APH(3'')-Ib	APH(3'')-Ib is an aminoglycoside phosphotransferase encoded by plasmids, transposons, integrative conjugative elements and chromosomes in Enterobacteriaceae and Pseudomonas spp.	APH(3'')	aminoglycoside antibiotic	Aminoglycoside	antibiotic inactivation
3002641	APH(3')-Ia	APH(3')-Ia is a transposon-encoded aminoglycoside phosphotransferase in E. coli and S. enterica. It is identical at the protein sequence to APH(3')-Ic, an aminoglycoside phosphotransferase encoded by plasmids, transposons and genomic islands in K. pneumoniae, A. baumannii, S. marcescens, Corynebacterium spp., Photobacterium spp. and Citrobacter spp.	APH(3')	aminoglycoside antibiotic	Aminoglycoside	antibiotic inactivation
3002644	APH(3')-IIa	APH(3')-IIa is a transposon-encoded aminoglycoside phosphotransferase in E. coli	APH(3')	aminoglycoside antibiotic	Aminoglycoside	antibiotic inactivation
3002645	APH(3')-IIb	APH(3')-IIb is a chromosomal-encoded aminoglycoside phosphotransferase in P. aeruginosa	APH(3')	aminoglycoside antibiotic	Aminoglycoside	antibiotic inactivation
3002646	APH(3')-IIc	APH(3')-IIc is a chromosomal-encoded aminoglycoside phosphotransferase in S. maltophilia	APH(3')	aminoglycoside antibiotic	Aminoglycoside	antibiotic inactivation
3002647	APH(3')-IIIa	APH(3')-IIIa is a plasmid-encoded aminoglycoside phosphotransferase in S. aureus and Enterococcus spp.	APH(3')	aminoglycoside antibiotic	Aminoglycoside	antibiotic inactivation
3002648	APH(3')-IVa	APH(3')-IVa is a chromosomal-encoded aminoglycoside phosphotransferase in B. circulans	APH(3')	aminoglycoside antibiotic	Aminoglycoside	antibiotic inactivation
3002654	APH(3')-VIIa	APH(3')-VIIa is a plasmid-encoded aminoglycoside phosphotransferase in C. jejuni	APH(3')	aminoglycoside antibiotic	Aminoglycoside	antibiotic inactivation
3002655	APH(4)-Ia	APH(4)-Ia is a plasmid-encoded aminoglycoside phosphotransferase in E. coli	APH(4)	aminoglycoside antibiotic	Aminoglycoside	antibiotic inactivation
3002660	APH(6)-Id	APH(6)-Id is an aminoglycoside phosphotransferase encoded by plasmids, integrative conjugative elements and chromosomal genomic islands in K. pneumoniae, Salmonella spp., E. coli, Shigella flexneri, Providencia alcalifaciens, Pseudomonas spp., V. cholerae, Edwardsiella tarda, Pasteurella multocida and Aeromonas bestiarum	APH(6)	aminoglycoside antibiotic	Aminoglycoside	antibiotic inactivation
3002665	npmA	NpmA is a plasmid-mediated aminoglycoside-resistance 16S rRNA methyltransferase by interfering with aminoglycoside binding with the A site of 16S rRNA through N-1 methylation at position A1408.	16S rRNA methyltransferase (A1408)	aminoglycoside antibiotic	Aminoglycoside	antibiotic target alteration
3002666	rmtF	RmtF is a 16S rRNA methyltransferase found in Pseudomonas aeruginosa which methylates G1405 of the 16S rRNA. It confers high level resistance to many aminoglycosides.	16S rRNA methyltransferase (G1405)	aminoglycoside antibiotic	Aminoglycoside	antibiotic target alteration
3002667	rmtD	RmtD is a 16S rRNA methyltransferase found in Pseudomonas aeruginosa which methylates G1405 of the 16S rRNA. It confers high level resistance to many aminoglycosides.	16S rRNA methyltransferase (G1405)	aminoglycoside antibiotic	Aminoglycoside	antibiotic target alteration
3002668	rmtG	RmtG is a 16S rRNA methyltransferase found in Pseudomonas aeruginosa which methylates G1405 of the 16S rRNA. It confers high level resistance to many aminoglycosides.	16S rRNA methyltransferase (G1405)	aminoglycoside antibiotic	Aminoglycoside	antibiotic target alteration
3002669	APH(2'')-Ig	APH('')-Ig is a plasmid-encoded aminoglycoside phosphotransferase in Campylobacter coli	APH(2'')	aminoglycoside antibiotic	Aminoglycoside	antibiotic inactivation
3002672	Bacillus pumilus cat86	cat86 is a chromosome-encoded variant of the cat gene found in Bacillus pumilus	chloramphenicol acetyltransferase (CAT)	phenicol antibiotic	Phenicol	antibiotic inactivation
3002674	Clostridium butyricum catB	catB is a chromosome-encoded variant of the cat gene found in Clostridium butyricum	chloramphenicol acetyltransferase (CAT)	phenicol antibiotic	Phenicol	antibiotic inactivation
3002675	catB2	catB2 is a plasmid-encoded variant of the cat gene found in Escherichia coli, Salmonella enteritidis and Pasteurella multocida	chloramphenicol acetyltransferase (CAT)	phenicol antibiotic	Phenicol	antibiotic inactivation
3002676	catB3	catB3 is a plasmid or chromosome-encoded variant of the cat gene found in Salmonella typhimurium, Acinetobacter baumannii and Escherichia coli	chloramphenicol acetyltransferase (CAT)	phenicol antibiotic	Phenicol	antibiotic inactivation
3002678	Pseudomonas aeruginosa catB6	catB6 is a plasmid-encoded variant of the cat gene found in Pseudomonas aeruginosa	chloramphenicol acetyltransferase (CAT)	phenicol antibiotic	Phenicol	antibiotic inactivation
3002679	Pseudomonas aeruginosa catB7	catB7 is a chromosome-encoded variant of the cat gene found in Pseudomonas aeruginosa	chloramphenicol acetyltransferase (CAT)	phenicol antibiotic	Phenicol	antibiotic inactivation
3002680	catB8	catB8 is a plasmid or integron-encoded variant of the cat gene found in Klebsiella pneumoniae, Salmonella typhi and Pseudomonas aeruginosa	chloramphenicol acetyltransferase (CAT)	phenicol antibiotic	Phenicol	antibiotic inactivation
3002681	catB9	catB9 is a chromosome-encoded variant of the cat gene found in Vibrio cholerae	chloramphenicol acetyltransferase (CAT)	phenicol antibiotic	Phenicol	antibiotic inactivation
3002683	catI	catI is a chromosome and transposon-encoded variant of the cat gene found in Escherichia coli and Acinetobacter baumannii	chloramphenicol acetyltransferase (CAT)	phenicol antibiotic	Phenicol	antibiotic inactivation
3002684	catII	catII is a plasmid-encoded variant of the cat gene found in Haemophilus influenzae, Agrobacterium tumefaciens and Escherichia coli	chloramphenicol acetyltransferase (CAT)	phenicol antibiotic	Phenicol	antibiotic inactivation
3002685	catIII	catIII is a plasmid-encoded variant of the cat gene found in Shigella flexneri	chloramphenicol acetyltransferase (CAT)	phenicol antibiotic	Phenicol	antibiotic inactivation
3002686	catP	catP is a transposon and chromosome-encoded variant of the cat gene found in Clostridium perfringens and Neisseria meningitidis	chloramphenicol acetyltransferase (CAT)	phenicol antibiotic	Phenicol	antibiotic inactivation
3002687	catQ	catQ is a chromosome-encoded variant of the cat gene found in Clostridium perfringens	chloramphenicol acetyltransferase (CAT)	phenicol antibiotic	Phenicol	antibiotic inactivation
3002688	catS	catS is a chromosome-encoded variant of the cat gene found in Streptococcus pyogenes	chloramphenicol acetyltransferase (CAT)	phenicol antibiotic	Phenicol	antibiotic inactivation
3002689	plasmid-encoded cat (pp-cat)	pp-cat is a plasmid-encoded variant of the cat gene found in Photobacterium damselae subsp. piscicida	chloramphenicol acetyltransferase (CAT)	phenicol antibiotic	Phenicol	antibiotic inactivation
3002690	Streptomyces lividans cmlR	cmlR is a plasmid or chromosome-encoded chloramphenicol resistance determinant (putative transmembrane protein) that is found in Escherichia coli and Streptomyces lividans	major facilitator superfamily (MFS) antibiotic efflux pump	phenicol antibiotic	Phenicol	antibiotic efflux
3002693	cmlA1	cmlA1 is a plasmid or transposon-encoded chloramphenicol exporter that is found in Pseudomonas aeruginosa and Klebsiella pneumoniae	major facilitator superfamily (MFS) antibiotic efflux pump	phenicol antibiotic	Phenicol	antibiotic efflux
3002695	cmlA5	cmlA5 is a plasmid or transposon-encoded chloramphenicol exporter that is found in Escherichia coli	major facilitator superfamily (MFS) antibiotic efflux pump	phenicol antibiotic	Phenicol	antibiotic efflux
3002696	cmlA6	cmlA6 is a plasmid-encoded chloramphenicol exporter that is found in Pseudomonas aeruginosa	major facilitator superfamily (MFS) antibiotic efflux pump	phenicol antibiotic	Phenicol	antibiotic efflux
3002698	cmlB	cmlB is a plasmid-encoded chloramphenicol exporter that is found in Klebsiella aerogenes	major facilitator superfamily (MFS) antibiotic efflux pump	phenicol antibiotic	Phenicol	antibiotic efflux
3002699	cmlB1	cmlB1 is a plasmid-encoded chloramphenicol exporter that is found in Bordetella bronchiseptica	major facilitator superfamily (MFS) antibiotic efflux pump	phenicol antibiotic	Phenicol	antibiotic efflux
3002700	cmlv	cmlv is a chromosome-encoded chloramphenicol phoshotransferase that is found in Streptomyces venezuelae	chloramphenicol phosphotransferase	phenicol antibiotic	Phenicol	antibiotic inactivation
3002701	Rhodococcus fascians cmr	cmr is a plasmid-encoded chloramphenicol exporter that is found in Rhodococcus fascians and Corynebacterium glutamicum	major facilitator superfamily (MFS) antibiotic efflux pump	phenicol antibiotic	Phenicol	antibiotic efflux
3002702	cmrA	cmrA is a transposon-encoded chloramphenicol exporter that is found in Rhodococcus rhodochrous	major facilitator superfamily (MFS) antibiotic efflux pump	phenicol antibiotic	Phenicol	antibiotic efflux
3002703	cmx	cmx is a plasmid or transposon-encoded chloramphenicol exporter that is found in Corynebacterium striatum and Pseudomonas aeruginosa.	major facilitator superfamily (MFS) antibiotic efflux pump	phenicol antibiotic	Phenicol	antibiotic efflux
3002704	fexA	fexA is a plasmid-encoded chloramphenicol exporter that is found in Staphylococcus lentus	major facilitator superfamily (MFS) antibiotic efflux pump	phenicol antibiotic	Phenicol	antibiotic efflux
3002705	floR	floR is a plasmid or chromosome-encoded chloramphenicol exporter that is found in Bordetella bronchiseptica, Escherichia coli, Klebsiella pneumoniae, Salmonella enterica subsp. enterica serovar Typhimurium str. DT104 and Vibrio cholerae	major facilitator superfamily (MFS) antibiotic efflux pump	phenicol antibiotic	Phenicol	antibiotic efflux
3002707	QnrA1	QnrA1 is a plasmid-mediated quinolone resistance protein found in Klebsiella pneumoniae	quinolone resistance protein (qnr)	fluoroquinolone antibiotic	Fluoroquinolone	antibiotic target protection
3002709	QnrA3	QnrA3 is a plasmid-mediated quinolone resistance protein found in Shewanella algae	quinolone resistance protein (qnr)	fluoroquinolone antibiotic	Fluoroquinolone	antibiotic target protection
3002713	QnrA7	QnrA7 is a plasmid-mediated quinolone resistance protein found in Shewanella algae	quinolone resistance protein (qnr)	fluoroquinolone antibiotic	Fluoroquinolone	antibiotic target protection
3002720	QnrB6	QnrB6 is a plasmid-mediated quinolone resistance protein found in Pantoea agglomerans	quinolone resistance protein (qnr)	fluoroquinolone antibiotic	Fluoroquinolone	antibiotic target protection
3002728	QnrB14	QnrB14 is a plasmid-mediated quinolone resistance protein found in Citrobacter freundii	quinolone resistance protein (qnr)	fluoroquinolone antibiotic	Fluoroquinolone	antibiotic target protection
3002735	QnrB20	QnrB20 is a plasmid-mediated quinolone resistance protein found in Escherichia coli	quinolone resistance protein (qnr)	fluoroquinolone antibiotic	Fluoroquinolone	antibiotic target protection
3002744	QnrB29	QnrB29 is a plasmid-mediated quinolone resistance protein found in Citrobacter freundii	quinolone resistance protein (qnr)	fluoroquinolone antibiotic	Fluoroquinolone	antibiotic target protection
3002748	QnrB33	QnrB33 is a plasmid-mediated quinolone resistance protein found in Citrobacter braakii	quinolone resistance protein (qnr)	fluoroquinolone antibiotic	Fluoroquinolone	antibiotic target protection
3002750	QnrB35	QnrB35 is a plasmid-mediated quinolone resistance protein found in Citrobacter freundii	quinolone resistance protein (qnr)	fluoroquinolone antibiotic	Fluoroquinolone	antibiotic target protection
3002789	QnrD2	QnrD2 is a plasmid-mediated quinolone resistance protein found in Salmonella enterica	quinolone resistance protein (qnr)	fluoroquinolone antibiotic	Fluoroquinolone	antibiotic target protection
3002790	QnrS1	QnrS1 is a plasmid-mediated quinolone resistance protein found in Shigella flexneri	quinolone resistance protein (qnr)	fluoroquinolone antibiotic	Fluoroquinolone	antibiotic target protection
3002793	QnrS4	QnrS4 is a plasmid-mediated quinolone resistance protein found in Salmonella enterica	quinolone resistance protein (qnr)	fluoroquinolone antibiotic	Fluoroquinolone	antibiotic target protection
3002795	QnrS6	QnrS6 is a plasmid-mediated quinolone resistance protein found in Aeromonas hydrophila	quinolone resistance protein (qnr)	fluoroquinolone antibiotic	Fluoroquinolone	antibiotic target protection
3002797	QnrS8	QnrS8 is a plasmid-mediated quinolone resistance protein found in Klebsiella pneumoniae	quinolone resistance protein (qnr)	fluoroquinolone antibiotic	Fluoroquinolone	antibiotic target protection
3002798	QnrS9	QnrS9 is a plasmid-mediated quinolone resistance protein found in Klebsiella pneumoniae	quinolone resistance protein (qnr)	fluoroquinolone antibiotic	Fluoroquinolone	antibiotic target protection
3002799	QnrVC1	QnrVC1 is an integron-mediated quinolone resistance protein found in Vibrio cholerae	quinolone resistance protein (qnr)	fluoroquinolone antibiotic	Fluoroquinolone	antibiotic target protection
3002802	QnrVC5	QnrVC5 is an integron-mediated quinolone resistance protein found in Vibrio fluvialis	quinolone resistance protein (qnr)	fluoroquinolone antibiotic	Fluoroquinolone	antibiotic target protection
3002804	FosA2	An enzyme that confers resistance to fosfomycin in Enterobacter cloacae by breaking the epoxide ring of the molecule. It depends on the cofactors Manganese (II) and Potassium and uses Glutathione (GSH) as the nucleophilic molecule.	fosfomycin thiol transferase	fosfomycin	Fosfomycin	antibiotic inactivation
3002812	pp-flo	pp-flo is a plasmid chloramphenicol exporter that is found in Photobacterium damselae subsp. piscicida	major facilitator superfamily (MFS) antibiotic efflux pump	phenicol antibiotic	Phenicol	antibiotic efflux
3002813	lmrB	lmrB is a chromosomally-encoded efflux pump that confers resistance to lincosamides in Bacillus subtilis	ATP-binding cassette (ABC) antibiotic efflux pump	lincosamide antibiotic	MLS	antibiotic efflux
3002814	clbA	clbA is a plasmid-encoded cfr gene found in Bacillus velezensis (Bacillus amyloliquefaciens subsp. plantarum).	Cfr 23S ribosomal RNA methyltransferase	lincosamide antibiotic;phenicol antibiotic;pleuromutilin antibiotic;streptogramin antibiotic	Multidrug	antibiotic target alteration
3002815	clbB	clbB is a plasmid-encoded cfr gene found in Bacillus brevis	Cfr 23S ribosomal RNA methyltransferase	lincosamide antibiotic;phenicol antibiotic;pleuromutilin antibiotic;streptogramin antibiotic	Multidrug	antibiotic target alteration
3002816	clbC	clbC is a plasmid-encoded cfr gene found in Bacillus clausii	Cfr 23S ribosomal RNA methyltransferase	lincosamide antibiotic;phenicol antibiotic;pleuromutilin antibiotic;streptogramin antibiotic	Multidrug	antibiotic target alteration
3002817	carA	carA is an ABC-F subfamily protein involved in macrolide resistance. It is found in Streptomyces thermotolerans	ABC-F ATP-binding cassette ribosomal protection protein	lincosamide antibiotic;macrolide antibiotic;oxazolidinone antibiotic;phenicol antibiotic;pleuromutilin antibiotic;streptogramin antibiotic;tetracycline antibiotic	Multidrug	antibiotic target protection
3002819	msrC	msrC is a chromosomal-encoded ABC-F subfamily protein expressed in Enterococcus faecium that confers resistance to erythromycin and other macrolide and streptogramin B antibiotics.	ABC-F ATP-binding cassette ribosomal protection protein	lincosamide antibiotic;macrolide antibiotic;oxazolidinone antibiotic;phenicol antibiotic;pleuromutilin antibiotic;streptogramin antibiotic;tetracycline antibiotic	Multidrug	antibiotic target protection
3002823	ErmH	ErmH is a plasmid-mediated methyltransferase found in Streptomyces thermotolerans	Erm 23S ribosomal RNA methyltransferase	lincosamide antibiotic;macrolide antibiotic;streptogramin antibiotic	MLS	antibiotic target alteration
3002824	ErmV	ErmV is a plasmid-mediated methyltransferase found in Streptomyces viridochromogenes	Erm 23S ribosomal RNA methyltransferase	lincosamide antibiotic;macrolide antibiotic;streptogramin antibiotic	MLS	antibiotic target alteration
3002825	ErmY	ErmY is a plasmid-mediated methyltransferase found in Staphylococcus aureus	Erm 23S ribosomal RNA methyltransferase	lincosamide antibiotic;macrolide antibiotic;streptogramin antibiotic	MLS	antibiotic target alteration
3002827	tlrC	tlrC is an ABC-F subfamily protein found in Streptomyces fradiae and confers resistance to mycinamicin, tylosin and lincosamides. tlrC is found in the tylosin biosynthetic cluster and is one mechanism by which S. fradiae protects itself from self-destruction when producing this macrolide.	ABC-F ATP-binding cassette ribosomal protection protein	lincosamide antibiotic;macrolide antibiotic;oxazolidinone antibiotic;phenicol antibiotic;pleuromutilin antibiotic;streptogramin antibiotic;tetracycline antibiotic	Multidrug	antibiotic target protection
3002828	srmB	srmB is an ABC-F subfamily protein found in Streptomyces ambofaciens that confers resistance to spiramycin	ABC-F ATP-binding cassette ribosomal protection protein	lincosamide antibiotic;macrolide antibiotic;oxazolidinone antibiotic;phenicol antibiotic;pleuromutilin antibiotic;streptogramin antibiotic;tetracycline antibiotic	Multidrug	antibiotic target protection
3002829	vgaA	vgaA is an ABC-F subfamily protein expressed in staphylococci that confers resistance to streptogramin A antibiotics and related compounds. It is associated with plasmid DNA.	ABC-F ATP-binding cassette ribosomal protection protein	lincosamide antibiotic;macrolide antibiotic;oxazolidinone antibiotic;phenicol antibiotic;pleuromutilin antibiotic;streptogramin antibiotic;tetracycline antibiotic	Multidrug	antibiotic target protection
3002830	vgaALC	vgaALC is an ABC-F subfamily protein expressed in staphylococci that confers resistance to streptogramin A antibiotics and related compounds. It is associated with plasmid DNA.	ABC-F ATP-binding cassette ribosomal protection protein	lincosamide antibiotic;macrolide antibiotic;oxazolidinone antibiotic;phenicol antibiotic;pleuromutilin antibiotic;streptogramin antibiotic;tetracycline antibiotic	Multidrug	antibiotic target protection
3002831	vgaC	vgaC is an ABC-F subfamily protein expressed in staphylococci that confers resistance to streptogramin A antibiotics and related compounds. It is associated with plasmid DNA.	ABC-F ATP-binding cassette ribosomal protection protein	lincosamide antibiotic;macrolide antibiotic;oxazolidinone antibiotic;phenicol antibiotic;pleuromutilin antibiotic;streptogramin antibiotic;tetracycline antibiotic	Multidrug	antibiotic target protection
3002832	vgaD	vgaD is an ABC-F subfamily protein expressed in Enterococcus faecium that confers resistance to streptogramin A antibiotics and related compounds. It is associated with plasmid DNA.	ABC-F ATP-binding cassette ribosomal protection protein	lincosamide antibiotic;macrolide antibiotic;oxazolidinone antibiotic;phenicol antibiotic;pleuromutilin antibiotic;streptogramin antibiotic;tetracycline antibiotic	Multidrug	antibiotic target protection
3002833	vgaE	vgaE is an ABC-F subfamily protein expressed in staphylococci that confers resistance to streptogramin A antibiotics and related compounds. It is associated with transposon DNA.	ABC-F ATP-binding cassette ribosomal protection protein	lincosamide antibiotic;macrolide antibiotic;oxazolidinone antibiotic;phenicol antibiotic;pleuromutilin antibiotic;streptogramin antibiotic;tetracycline antibiotic	Multidrug	antibiotic target protection
3002835	lnuA	lnuA is a plasmid-mediated nucleotidyltransferase found in Staphylococcus chromogenes	lincosamide nucleotidyltransferase (LNU)	lincosamide antibiotic	MLS	antibiotic inactivation
3002837	lnuC	lnuC is a transposon-mediated nucleotidyltransferase found in Streptococcus agalactiae	lincosamide nucleotidyltransferase (LNU)	lincosamide antibiotic	MLS	antibiotic inactivation
3002838	lnuD	lnuD is a plasmid-mediated nucleotidyltransferase found in Streptococcus uberis	lincosamide nucleotidyltransferase (LNU)	lincosamide antibiotic	MLS	antibiotic inactivation
3002840	vatA	vatA is a plasmid-mediated acetyltransferase found in Staphylococcus aureus	streptogramin vat acetyltransferase	streptogramin antibiotic	MLS	antibiotic inactivation
3002841	vatB	vatB is a plasmid-mediated acetyltransferase found in Staphylococcus aureus	streptogramin vat acetyltransferase	streptogramin antibiotic	MLS	antibiotic inactivation
3002842	vatC	vatC is a plasmid-mediated acetyltransferase found in Staphylococcus cohnii	streptogramin vat acetyltransferase	streptogramin antibiotic	MLS	antibiotic inactivation
3002843	vatD	vatD is a transposon-mediated acetyltransferase found in Enterococcus faecium	streptogramin vat acetyltransferase	streptogramin antibiotic	MLS	antibiotic inactivation
3002844	vatE	vatE is a transposon-mediated acetyltransferase found in Enterococcus faecium	streptogramin vat acetyltransferase	streptogramin antibiotic	MLS	antibiotic inactivation
3002845	vatH	vatH is a plasmid-mediated acetyltransferase found in Enterococcus faecium	streptogramin vat acetyltransferase	streptogramin antibiotic	MLS	antibiotic inactivation
3002846	arr-1	arr-1 is a chromosome-encoded ribosyltransferase found in Mycolicibacterium smegmatis	rifampin ADP-ribosyltransferase (Arr)	rifamycin antibiotic	Rifamycin	antibiotic inactivation
3002847	arr-2	arr-2 is an integron-encoded ribosyltransferase found in Pseudomonas aeruginosa	rifampin ADP-ribosyltransferase (Arr)	rifamycin antibiotic	Rifamycin	antibiotic inactivation
3002848	arr-3	arr-3 is a plasmid-encoded ribosyltransferase found in Vibrio fluvialis	rifampin ADP-ribosyltransferase (Arr)	rifamycin antibiotic	Rifamycin	antibiotic inactivation
3002854	dfrA1	dfrA1 is an integron-encoded dihydrofolate reductase	trimethoprim resistant dihydrofolate reductase dfr	diaminopyrimidine antibiotic	Diaminopyrimidine	antibiotic target replacement
3002856	dfrA24	dfrA24 is an integron-encoded dihydrofolate reductase found in Escherichia coli	trimethoprim resistant dihydrofolate reductase dfr	diaminopyrimidine antibiotic	Diaminopyrimidine	antibiotic target replacement
3002857	dfrA26	dfrA26 is an integron-encoded dihydrofolate reductase found in Escherichia coli	trimethoprim resistant dihydrofolate reductase dfr	diaminopyrimidine antibiotic	Diaminopyrimidine	antibiotic target replacement
3002858	dfrA12	dfrA12 is an integron-encoded dihydrofolate reductase found in Vibrio cholerae	trimethoprim resistant dihydrofolate reductase dfr	diaminopyrimidine antibiotic	Diaminopyrimidine	antibiotic target replacement
3002859	dfrA14	dfrA14 is an integron-encoded dihydrofolate reductase found in Escherichia coli	trimethoprim resistant dihydrofolate reductase dfr	diaminopyrimidine antibiotic	Diaminopyrimidine	antibiotic target replacement
3002860	dfrA17	dfrA17 is an integron-encoded dihydrofolate reductase found in Escherichia coli	trimethoprim resistant dihydrofolate reductase dfr	diaminopyrimidine antibiotic	Diaminopyrimidine	antibiotic target replacement
3002863	dfrA8	dfrA8 is a transposon-encoded dihydrofolate reductase found in Salmonella enterica	trimethoprim resistant dihydrofolate reductase dfr	diaminopyrimidine antibiotic	Diaminopyrimidine	antibiotic target replacement
3002865	dfrC	dfrC is a chromosome-encoded dihydrofolate reductase found in Staphylococcus aureus	trimethoprim resistant dihydrofolate reductase dfr	diaminopyrimidine antibiotic	Diaminopyrimidine	antibiotic target replacement
3002866	dfrD	dfrD is a plasmid-encoded dihydrofolate reductase found in Listeria monocytogenes	trimethoprim resistant dihydrofolate reductase dfr	diaminopyrimidine antibiotic	Diaminopyrimidine	antibiotic target replacement
3002867	dfrF	dfrF is a chromosome-encoded dihydrofolate reductase found in Streptococcus pyogenes	trimethoprim resistant dihydrofolate reductase dfr	diaminopyrimidine antibiotic	Diaminopyrimidine	antibiotic target replacement
3002868	dfrG	dfrG is a plasmid-encoded dihydrofolate reductase found in Staphylococcus aureus	trimethoprim resistant dihydrofolate reductase dfr	diaminopyrimidine antibiotic	Diaminopyrimidine	antibiotic target replacement
3002869	dfrK	dfrK is a plasmid-encoded dihydrofolate reductase found in Staphylococcus aureus	trimethoprim resistant dihydrofolate reductase dfr	diaminopyrimidine antibiotic	Diaminopyrimidine	antibiotic target replacement
3002871	tet37	tet37 is a chromosome-encoded oxidoreductase isolated from an uncultured bacterium that confers resistance to tetracycline	tetracycline inactivation enzyme	tetracycline antibiotic	Tetracycline	antibiotic inactivation
3002872	FosA3	An enzyme that confers resistance to fosfomycin in Escherichia coli by breaking the epoxide ring of the molecule. It depends on the cofactors Manganese (II) and Potassium and uses Glutathione (GSH) as the nucleophilic molecule.	fosfomycin thiol transferase	fosfomycin	Fosfomycin	antibiotic inactivation
3002873	FosB3	A thiol transferase that leads to the resistance of fosfomycin in Enterococcus faecium. Contrasting FosA, FosB is dependent on the cofactor Magnesium (II) and uses either bacillithiol to open up the epoxide ring of fosfomycin.	fosfomycin thiol transferase	fosfomycin	Fosfomycin	antibiotic inactivation
3002875	dfrE	dfrE is a chromosome-encoded dihydrofolate reductase found in Enterococcus faecalis	trimethoprim resistant dihydrofolate reductase dfr	diaminopyrimidine antibiotic	Diaminopyrimidine	antibiotic target replacement
3002879	linG	linG is an integron-associated gene cassette, with aadA2, encoding a lincosomide nucleotidyltransferase found in Salmonella enterica. linG confers resistance to lincosomide antibiotics.	lincosamide nucleotidyltransferase (LNU)	lincosamide antibiotic	MLS	antibiotic inactivation
3002881	lmrC	lmrC is an ABC-F subfamily protein that confers resistance to lincosamides in Streptomyces lincolnensis and Lactococcus lactis. It can dimerize with lmrD	ABC-F ATP-binding cassette ribosomal protection protein	lincosamide antibiotic;macrolide antibiotic;oxazolidinone antibiotic;phenicol antibiotic;pleuromutilin antibiotic;streptogramin antibiotic;tetracycline antibiotic	Multidrug	antibiotic target protection
3002882	lmrD	lmrD is a chromosomally-encoded efflux pump that confers resistance to lincosamides in Streptomyces lincolnensis and Lactococcus lactis. It can dimerize with lmrC	ATP-binding cassette (ABC) antibiotic efflux pump	lincosamide antibiotic	MLS	antibiotic efflux
3002883	rgt1438	rgt1438 is a glycosyltransferase that confers rifampin resistance in Streptomyces	rifampin glycosyltransferase	rifamycin antibiotic	Rifamycin	antibiotic inactivation
3002884	iri	iri is a monooxygenase that confers resistance to rifampin found in Rhodococcus hoagii	rifampin monooxygenase	rifamycin antibiotic	Rifamycin	antibiotic inactivation
3002891	otr(A)	otr(A) is an oxytetracycline resistance ribosomal protection protein found in Streptomyces rimosus	tetracycline-resistant ribosomal protection protein	tetracycline antibiotic	Tetracycline	antibiotic target protection
3002892	otr(B)	otr(B) is a tetracycline resistance efflux pump found in Streptomyces rimosus	major facilitator superfamily (MFS) antibiotic efflux pump	tetracycline antibiotic	Tetracycline	antibiotic efflux
3002893	tcr3	tcr3 is a tetracycline efflux pump that confers self-resistance to Kitasatospora aureofaciens	major facilitator superfamily (MFS) antibiotic efflux pump	tetracycline antibiotic	Tetracycline	antibiotic efflux
3002894	otrC	otrC is a tetracycline resistance efflux pump found in Streptomyces rimosus	ATP-binding cassette (ABC) antibiotic efflux pump	tetracycline antibiotic	Tetracycline	antibiotic efflux
3002895	SAT-2	SAT-2 is a plasmid-mediated streptothricin acetyltransferase, which confers resistance to streptothricin, a nucleoside antibiotic. Originally described from an E. coli plasmid sequence by Heim et al., 1989.	streptothricin acetyltransferase (SAT)	nucleoside antibiotic	Nucleoside	antibiotic inactivation
3002897	SAT-4	SAT-4 is a plasmid-mediated streptothricin acetyltransferase and streptothricin (a nucleoside antibiotic) resistant determinant. Originally described from a Campylobacter coli BE/G4 plasmid gene sequence by Jacob et al, 1994.	streptothricin acetyltransferase (SAT)	nucleoside antibiotic	Nucleoside	antibiotic inactivation
3002898	SAT-3	SAT-3 is a plasmid-mediated streptothricin acetyltransferase and streptothricin resistance determinant. Originally described from an E. coli plasmid gene by Tietze and Brevet, 1995.	streptothricin acetyltransferase (SAT)	nucleoside antibiotic	Nucleoside	antibiotic inactivation
3002907	vanE	VanE is a D-Ala-D-Ala ligase homolog that can synthesize D-Ala-D-Ser, an alternative substrate for peptidoglycan synthesis that reduces vancomycin binding affinity in Enterococcus faecalis	glycopeptide resistance gene cluster;van ligase	glycopeptide antibiotic	Glycopeptide	antibiotic target alteration
3002908	vanF	VanF is a D-Ala-D-Ala ligase homolog that can synthesize D-Ala-D-Lac, an alternative substrate for peptidoglycan synthesis that reduces vancomycin binding affinity. It is associated with both vancomycin and teicoplanin resistance in Paenibacillus popilliae	glycopeptide resistance gene cluster;van ligase	glycopeptide antibiotic	Glycopeptide	antibiotic target alteration
3002909	vanG	VanG is a D-Ala-D-Ala ligase homolog that can synthesize D-Ala-D-Ser, an alternative substrate for peptidoglycan synthesis that reduces vancomycin binding affinity in Enterococcus faecalis	glycopeptide resistance gene cluster;van ligase	glycopeptide antibiotic	Glycopeptide	antibiotic target alteration
3002910	vanL	VanL is a D-Ala-D-Ala ligase homolog that can synthesize D-Ala-D-Ser, an alternative substrate for peptidoglycan synthesis that reduces vancomycin binding affinity in Enterococcus faecalis	glycopeptide resistance gene cluster;van ligase	glycopeptide antibiotic	Glycopeptide	antibiotic target alteration
3002911	vanM	VanM is a D-Ala-D-Ala ligase homolog that can synthesize D-Ala-D-Lac, an alternative substrate for peptidoglycan synthesis that reduces vancomycin binding affinity. It is associated with both vancomycin and teicoplanin resistance.	glycopeptide resistance gene cluster;van ligase	glycopeptide antibiotic	Glycopeptide	antibiotic target alteration
3002912	vanN	VanN is a D-Ala-D-Ala ligase homolog that can synthesize D-Ala-D-Ser, an alternative substrate for peptidoglycan synthesis that reduces vancomycin binding affinity in Enterococcus faecium	glycopeptide resistance gene cluster;van ligase	glycopeptide antibiotic	Glycopeptide	antibiotic target alteration
3002913	vanO	VanO is a D-Ala-D-Ala ligase homolog that can synthesize D-Ala-D-Lac, an alternative substrate for peptidoglycan synthesis that reduces vancomycin binding affinity. It is associated with both vancomycin and teicoplanin resistance.	glycopeptide resistance gene cluster;van ligase	glycopeptide antibiotic	Glycopeptide	antibiotic target alteration
3002919	vanRA	vanRA, also known as vanR, is a vanR variant found in the vanA gene cluster	glycopeptide resistance gene cluster;vanR	glycopeptide antibiotic	Glycopeptide	antibiotic target alteration
3002921	vanRB	vanRB is a vanR variant found in the vanB gene cluster	glycopeptide resistance gene cluster;vanR	glycopeptide antibiotic	Glycopeptide	antibiotic target alteration
3002922	vanRC	vanRC is a vanR variant found in the vanC gene cluster	glycopeptide resistance gene cluster;vanR	glycopeptide antibiotic	Glycopeptide	antibiotic target alteration
3002923	vanRD	vanRD is a mutated vanR variant found in the vanD gene cluster that caused constitutive expression of vanD peptidoglycan synthesis	glycopeptide resistance gene cluster;vanR	glycopeptide antibiotic	Glycopeptide	antibiotic target alteration
3002924	vanRE	vanRE is a vanR variant found in the vanE gene cluster	glycopeptide resistance gene cluster;vanR	glycopeptide antibiotic	Glycopeptide	antibiotic target alteration
3002925	vanRF	vanRF is a vanR variant found in the vanF gene cluster	glycopeptide resistance gene cluster;vanR	glycopeptide antibiotic	Glycopeptide	antibiotic target alteration
3002926	vanRG	vanRG is a vanR variant found in the vanG gene cluster	glycopeptide resistance gene cluster;vanR	glycopeptide antibiotic	Glycopeptide	antibiotic target alteration
3002927	vanRL	vanRL is a vanR variant found in the vanL gene cluster	glycopeptide resistance gene cluster;vanR	glycopeptide antibiotic	Glycopeptide	antibiotic target alteration
3002928	vanRM	vanRM is a vanR variant found in the vanM gene cluster	glycopeptide resistance gene cluster;vanR	glycopeptide antibiotic	Glycopeptide	antibiotic target alteration
3002929	vanRN	vanRN is a vanR variant found in the vanN gene cluster	glycopeptide resistance gene cluster;vanR	glycopeptide antibiotic	Glycopeptide	antibiotic target alteration
3002930	vanRO	vanRO is a vanR variant found in the vanO gene cluster	glycopeptide resistance gene cluster;vanR	glycopeptide antibiotic	Glycopeptide	antibiotic target alteration
3002931	vanSA	vanSA, also known as vanS, is a vanS variant found in the vanA gene cluster	glycopeptide resistance gene cluster;vanS	glycopeptide antibiotic	Glycopeptide	antibiotic target alteration
3002932	vanSB	vanSB is a vanS variant found in the vanB gene cluster	glycopeptide resistance gene cluster;vanS	glycopeptide antibiotic	Glycopeptide	antibiotic target alteration
3002933	vanSC	vanSC is a vanS variant found in the vanC gene cluster	glycopeptide resistance gene cluster;vanS	glycopeptide antibiotic	Glycopeptide	antibiotic target alteration
3002934	vanSD	vanSD is a mutated vanS variant found in the vanD gene cluster that caused constitutive expression of vanD peptidoglycan synthesis	glycopeptide resistance gene cluster;vanS	glycopeptide antibiotic	Glycopeptide	antibiotic target alteration
3002935	vanSE	vanSE is a vanS variant found in the vanE gene cluster	glycopeptide resistance gene cluster;vanS	glycopeptide antibiotic	Glycopeptide	antibiotic target alteration
3002936	vanSF	vanSF is a vanS variant found in the vanF gene cluster	glycopeptide resistance gene cluster;vanS	glycopeptide antibiotic	Glycopeptide	antibiotic target alteration
3002937	vanSG	vanSG is a vanS variant found in the vanG gene cluster	glycopeptide resistance gene cluster;vanS	glycopeptide antibiotic	Glycopeptide	antibiotic target alteration
3002938	vanSL	vanSL is a vanS variant found in the vanL gene cluster	glycopeptide resistance gene cluster;vanS	glycopeptide antibiotic	Glycopeptide	antibiotic target alteration
3002939	vanSM	vanSM is a vanS variant found in the vanM gene cluster	glycopeptide resistance gene cluster;vanS	glycopeptide antibiotic	Glycopeptide	antibiotic target alteration
3002940	vanSN	vanSN is a vanS variant found in the vanN gene cluster	glycopeptide resistance gene cluster;vanS	glycopeptide antibiotic	Glycopeptide	antibiotic target alteration
3002941	vanSO	vanSO is a vanS variant found in the vanO gene cluster	glycopeptide resistance gene cluster;vanS	glycopeptide antibiotic	Glycopeptide	antibiotic target alteration
3002942	vanHA	vanHA, also known as vanH, is a vanH variant in the vanA gene cluster	glycopeptide resistance gene cluster;vanH	glycopeptide antibiotic	Glycopeptide	antibiotic target alteration
3002943	vanHB	vanHB is a vanH variant in the vanB gene cluster	glycopeptide resistance gene cluster;vanH	glycopeptide antibiotic	Glycopeptide	antibiotic target alteration
3002944	vanHD	vanHD is a vanH variant in the vanD gene cluster	glycopeptide resistance gene cluster;vanH	glycopeptide antibiotic	Glycopeptide	antibiotic target alteration
3002945	vanHF	vanHF is a vanH variant in the vanF gene cluster	glycopeptide resistance gene cluster;vanH	glycopeptide antibiotic	Glycopeptide	antibiotic target alteration
3002947	vanHM	vanHM is a vanH variant in the vanM gene cluster	glycopeptide resistance gene cluster;vanH	glycopeptide antibiotic	Glycopeptide	antibiotic target alteration
3002948	vanHO	vanHO is a vanH variant in the vanO gene cluster	glycopeptide resistance gene cluster;vanH	glycopeptide antibiotic	Glycopeptide	antibiotic target alteration
3002949	vanXA	vanXA, also known as vanX, is a vanX variant found in the vanA gene cluster	glycopeptide resistance gene cluster;vanX	glycopeptide antibiotic	Glycopeptide	antibiotic target alteration
3002950	vanXB	vanXB is a vanX variant found in the vanB gene cluster	glycopeptide resistance gene cluster;vanX	glycopeptide antibiotic	Glycopeptide	antibiotic target alteration
3002952	vanXF	vanXF is a vanX variant found in the vanF gene cluster	glycopeptide resistance gene cluster;vanX	glycopeptide antibiotic	Glycopeptide	antibiotic target alteration
3002953	vanXM	vanXM is a vanX variant found in the vanM gene cluster	glycopeptide resistance gene cluster;vanX	glycopeptide antibiotic	Glycopeptide	antibiotic target alteration
3002954	vanXO	vanXO is a vanX variant found in the vanO gene cluster	glycopeptide resistance gene cluster;vanX	glycopeptide antibiotic	Glycopeptide	antibiotic target alteration
3002955	vanYA	vanYA, also known as vanY, is a vanY variant found in the vanA gene cluster	glycopeptide resistance gene cluster;vanY	glycopeptide antibiotic	Glycopeptide	antibiotic target alteration
3002956	vanYB	vanYB is a vanY variant found in the vanB gene cluster	glycopeptide resistance gene cluster;vanY	glycopeptide antibiotic	Glycopeptide	antibiotic target alteration
3002958	vanYF	vanYF is a vanY variant found in the vanF gene cluster	glycopeptide resistance gene cluster;vanY	glycopeptide antibiotic	Glycopeptide	antibiotic target alteration
3002959	vanYG1	vanYG1 is a vanY variant found in the vanG gene cluster	glycopeptide resistance gene cluster;vanY	glycopeptide antibiotic	Glycopeptide	antibiotic target alteration
3002961	vanYM	vanYM is a vanY variant found in the vanM gene cluster	glycopeptide resistance gene cluster;vanY	glycopeptide antibiotic	Glycopeptide	antibiotic target alteration
3002962	vanZA	vanZA, also known as vanZ, is a vanZ variant found in the vanA gene cluster	glycopeptide resistance gene cluster;vanZ	glycopeptide antibiotic	Glycopeptide	antibiotic target alteration
3002963	vanZF	vanZF is a vanZ variant found in the vanF gene cluster	glycopeptide resistance gene cluster;vanZ	glycopeptide antibiotic	Glycopeptide	antibiotic target alteration
3002964	vanWB	vanWB, also known as vanW, is a vanW variant found in the vanB gene cluster	glycopeptide resistance gene cluster;vanW	glycopeptide antibiotic	Glycopeptide	antibiotic target alteration
3002965	vanWG	vanWG is a vanW variant found in the vanG gene cluster	glycopeptide resistance gene cluster;vanW	glycopeptide antibiotic	Glycopeptide	antibiotic target alteration
3002966	vanXYC	vanXYC is a vanXY variant found in the vanC gene cluster	glycopeptide resistance gene cluster;vanXY	glycopeptide antibiotic	Glycopeptide	antibiotic target alteration
3002967	vanXYE	vanXYE is a vanXY variant found in the vanE gene cluster	glycopeptide resistance gene cluster;vanXY	glycopeptide antibiotic	Glycopeptide	antibiotic target alteration
3002968	vanXYL	vanXYL is a vanXY variant found in the vanL gene cluster	glycopeptide resistance gene cluster;vanXY	glycopeptide antibiotic	Glycopeptide	antibiotic target alteration
3002969	vanXYN	vanXYN is a vanXY variant found in the vanN gene cluster	glycopeptide resistance gene cluster;vanXY	glycopeptide antibiotic	Glycopeptide	antibiotic target alteration
3002970	vanTC	vanTC is a vanT variant found in the vanC gene cluster	glycopeptide resistance gene cluster;vanT	glycopeptide antibiotic	Glycopeptide	antibiotic target alteration
3002971	vanTE	vanTE is a vanT variant found in the vanE gene cluster	glycopeptide resistance gene cluster;vanT	glycopeptide antibiotic	Glycopeptide	antibiotic target alteration
3002972	vanTG	vanTG is a vanT variant found in the vanG gene cluster	glycopeptide resistance gene cluster;vanT	glycopeptide antibiotic	Glycopeptide	antibiotic target alteration
3002973	vanTmL	vanTmL is a vanT variant found in the vanL gene cluster. vanTmL codes for the membrane-binding domain of vanTL	glycopeptide resistance gene cluster;vanT	glycopeptide antibiotic	Glycopeptide	antibiotic target alteration
3002974	vanTrL	vanTrL is a vanT variant found in the vanL gene cluster. vanTrL codes for the racemase component of vanT	glycopeptide resistance gene cluster;vanT	glycopeptide antibiotic	Glycopeptide	antibiotic target alteration
3002975	vanTN	vanTN is a vanT variant found in the vanN gene cluster	glycopeptide resistance gene cluster;vanT	glycopeptide antibiotic	Glycopeptide	antibiotic target alteration
3002982	amrA	amrA is the efflux pump subunit of the AmrAB-OprM multidrug efflux complex. amrA corresponds to 1 locus in Pseudomonas aeruginosa PAO1 and 1 locus in Pseudomonas aeruginosa LESB58.	resistance-nodulation-cell division (RND) antibiotic efflux pump	aminoglycoside antibiotic	Multidrug	antibiotic efflux
3002983	amrB	amrB is the membrane fusion protein of the AmrAB-OprM multidrug efflux complex.	resistance-nodulation-cell division (RND) antibiotic efflux pump	aminoglycoside antibiotic	Multidrug	antibiotic efflux
3002985	arnA	arnA modifies lipid A with 4-amino-4-deoxy-L-arabinose (Ara4N) which allows gram-negative bacteria to resist the antimicrobial activity of cationic antimicrobial peptides and antibiotics such as polymyxin. arnA is found in E. coli and P. aeruginosa.	pmr phosphoethanolamine transferase	peptide antibiotic	Peptide	antibiotic target alteration
3002986	bacA	The bacA gene product (BacA) recycles undecaprenyl pyrophosphate during cell wall biosynthesis which confers resistance to bacitracin.	undecaprenyl pyrophosphate related proteins	peptide antibiotic	Peptide	antibiotic target alteration
3002987	bcrA	bcrA is an ABC transporter found in Bacillus licheniformis that confers bacitracin resistance	ATP-binding cassette (ABC) antibiotic efflux pump	peptide antibiotic	Peptide	antibiotic efflux
3002988	bcrB	bcrB is an ABC transporter found in Bacillus licheniformis that confers bacitracin resistance	ATP-binding cassette (ABC) antibiotic efflux pump	peptide antibiotic	Peptide	antibiotic efflux
3002993	AQU-1	AQU-1 is a chromosomal class C beta-lactamase found in clinical Aeromonas dhakensis isolates	AQU beta-lactamase	cephalosporin	Beta-lactam	antibiotic inactivation
3002995	ROB-1	ROB-1 is a beta-lactamase found in Pasteurella and Haemophilus	ROB beta-lactamase	cephalosporin;penam	Beta-lactam	antibiotic inactivation
3002997	LCR-1	LCR-1 is a class D beta-lactamase found in Pseudomonas aeruginosa	LCR beta-lactamase	cephalosporin;penam	Beta-lactam	antibiotic inactivation
3002999	CblA-1	CblA-1 beta-lactamase is a class A beta-lactamase found in Bacteroides uniformis that is species-specific.	CblA beta-lactamase	cephalosporin	Beta-lactam	antibiotic inactivation
3003002	CfxA2	cfxA2 beta-lactamase is a class A beta-lactamase found in Prevotella intermedia	CfxA beta-lactamase	cephamycin	Beta-lactam	antibiotic inactivation
3003003	CfxA3	cfxA3 beta-lactamase is a class A beta-lactamase found in Capnocytophaga ochracea	CfxA beta-lactamase	cephamycin	Beta-lactam	antibiotic inactivation
3003005	CfxA4	cfxA4 beta-lactamase is a class A beta-lactamase found in Bacteroides fragilis	CfxA beta-lactamase	cephamycin	Beta-lactam	antibiotic inactivation
3003006	blt	blt is an MFS efflux pump that confers resistance to multiple drugs such as rhodamine and acridine dyes, and fluoroquinolone antibiotics	major facilitator superfamily (MFS) antibiotic efflux pump	acridine dye;fluoroquinolone antibiotic	Multidrug	antibiotic efflux
3003007	bmr	bmr is an MFS antibiotic efflux pump that confers resistance to multiple drugs including acridine dyes, fluoroquinolone antibiotics, chloramphenicol, and puromycin	major facilitator superfamily (MFS) antibiotic efflux pump	acridine dye;fluoroquinolone antibiotic;nucleoside antibiotic;phenicol antibiotic	Multidrug	antibiotic efflux
3003009	ceoA	ceoA is a periplasmic linker subunit of the CeoAB-OpcM efflux pump	resistance-nodulation-cell division (RND) antibiotic efflux pump	aminoglycoside antibiotic;fluoroquinolone antibiotic	Multidrug	antibiotic efflux
3003010	ceoB	ceoB is a cytoplasmic membrane component of the CeoAB-OpcM efflux pump	resistance-nodulation-cell division (RND) antibiotic efflux pump	aminoglycoside antibiotic;fluoroquinolone antibiotic	Multidrug	antibiotic efflux
3003011	dfrA10	dfrA10 is an integron-encoded dihydrofolate reductase found in Klebsiella pneumoniae	trimethoprim resistant dihydrofolate reductase dfr	diaminopyrimidine antibiotic	Diaminopyrimidine	antibiotic target replacement
3003012	dfrA13	dfrA13 is an integron-encoded dihydrofolate reductase found in Escherichia coli	trimethoprim resistant dihydrofolate reductase dfr	diaminopyrimidine antibiotic	Diaminopyrimidine	antibiotic target replacement
3003016	dfrA20	dfrA20 is a plasmid-encoded dihydrofolate reductase found in Pasteurella multocida	trimethoprim resistant dihydrofolate reductase dfr	diaminopyrimidine antibiotic	Diaminopyrimidine	antibiotic target replacement
3003017	dfrA21	dfrA21 is an integron-encoded dihydrofolate reductase found in Salmonella enterica	trimethoprim resistant dihydrofolate reductase dfr	diaminopyrimidine antibiotic	Diaminopyrimidine	antibiotic target replacement
3003018	dfrA22	dfrA22 is an integron-encoded dihydrofolate reductase found in Salmonella enterica	trimethoprim resistant dihydrofolate reductase dfr	diaminopyrimidine antibiotic	Diaminopyrimidine	antibiotic target replacement
3003030	MexV	MexV is the membrane fusion protein of the MexVW-OprM multidrug efflux complex.	resistance-nodulation-cell division (RND) antibiotic efflux pump	acridine dye;fluoroquinolone antibiotic;macrolide antibiotic;phenicol antibiotic;tetracycline antibiotic	Multidrug	antibiotic efflux
3003031	MexW	MexW is the RND-type membrane protein of the efflux complex MexVW-OprM.	resistance-nodulation-cell division (RND) antibiotic efflux pump	acridine dye;fluoroquinolone antibiotic;macrolide antibiotic;phenicol antibiotic;tetracycline antibiotic	Multidrug	antibiotic efflux
3003033	mexY	MexY is the RND-type membrane protein of the efflux complex MexXY-OprM.	resistance-nodulation-cell division (RND) antibiotic efflux pump	acridine dye;aminoglycoside antibiotic;carbapenem;cephalosporin;cephamycin;fluoroquinolone antibiotic;macrolide antibiotic;penam;phenicol antibiotic;tetracycline antibiotic	Multidrug	antibiotic efflux
3003034	mexX	MexX is the membrane fusion protein of the MexXY-OprM multidrug efflux complex.	resistance-nodulation-cell division (RND) antibiotic efflux pump	acridine dye;aminoglycoside antibiotic;carbapenem;cephalosporin;cephamycin;fluoroquinolone antibiotic;macrolide antibiotic;penam;phenicol antibiotic;tetracycline antibiotic	Multidrug	antibiotic efflux
3003035	mfpA	mfpA is a qnr homolog and a pentapeptide repeat protein that confers resistance to fluoroquinolones in Mycolicibacterium smegmatis	quinolone resistance protein (qnr)	fluoroquinolone antibiotic	Fluoroquinolone	antibiotic target protection
3003036	oleB	oleB is an ABC-F subfamily protein in Streptomyces antibioticus and is involved in oleandomycin secretion	ABC-F ATP-binding cassette ribosomal protection protein	lincosamide antibiotic;macrolide antibiotic;oxazolidinone antibiotic;phenicol antibiotic;pleuromutilin antibiotic;streptogramin antibiotic;tetracycline antibiotic	Multidrug	antibiotic target protection
3003037	opcM	OpcM is an outer membrane factor protein found in Burkholderia cepacia. It is part of the CeoAB-OpcM complex.	resistance-nodulation-cell division (RND) antibiotic efflux pump	aminoglycoside antibiotic;fluoroquinolone antibiotic	Multidrug	antibiotic efflux
3003039	OprA	OprA is an outer membrane factor protein found in Pseudomonas aeruginosa. It is part of the MexXY-OprA complex.	resistance-nodulation-cell division (RND) antibiotic efflux pump	aminoglycoside antibiotic;carbapenem;fluoroquinolone antibiotic;macrolide antibiotic;tetracycline antibiotic	Multidrug	antibiotic efflux
3003046	qacA	qacA is a subunit of the qac multidrug efflux pump	major facilitator superfamily (MFS) antibiotic efflux pump	fluoroquinolone antibiotic	Multidrug	antibiotic efflux
3003047	qacB	qacB is a subunit of the qac multidrug efflux pump	major facilitator superfamily (MFS) antibiotic efflux pump	fluoroquinolone antibiotic	Multidrug	antibiotic efflux
3003048	rosA	rosA is part of an efflux pump/potassium antiporter system (RosAB) in Yersinia that confers resistance to cationic antimicrobial peptides such as polymyxin B.	major facilitator superfamily (MFS) antibiotic efflux pump	peptide antibiotic	Peptide	antibiotic efflux
3003049	rosB	rosB is part of an efflux pump/potassium antiporter system (RosAB) in Yersinia that confers resistance to cationic antimicrobial peptides such as polymyxin B.	major facilitator superfamily (MFS) antibiotic efflux pump	peptide antibiotic	Peptide	antibiotic efflux
3003051	smeA	smeA is the membrane fusion protein of the smeABC multidrug efflux complex in Stenotrophomonas maltophilia	resistance-nodulation-cell division (RND) antibiotic efflux pump	aminoglycoside antibiotic;cephalosporin;cephamycin;penam	Multidrug	antibiotic efflux
3003052	smeB	smeB is the inner membrane multidrug exporter of the efflux complex smeABC in Stenotrophomonas maltophilia	resistance-nodulation-cell division (RND) antibiotic efflux pump	aminoglycoside antibiotic;cephalosporin;cephamycin;penam	Multidrug	antibiotic efflux
3003053	smeC	smeC is an outer membrane multidrug efflux protein of the smeABC complex in Stenotrophomonas maltophilia	resistance-nodulation-cell division (RND) antibiotic efflux pump	aminoglycoside antibiotic;cephalosporin;cephamycin;penam	Multidrug	antibiotic efflux
3003055	smeD	smeD is the membrane fusion protein of the smeDEF multidrug efflux complex in Stenotrophomonas maltophilia	resistance-nodulation-cell division (RND) antibiotic efflux pump	fluoroquinolone antibiotic;macrolide antibiotic;phenicol antibiotic;tetracycline antibiotic	Multidrug	antibiotic efflux
3003056	smeE	smeE is the RND protein of the efflux complex smeDEF in Stenotrophomonas maltophilia	resistance-nodulation-cell division (RND) antibiotic efflux pump	fluoroquinolone antibiotic;macrolide antibiotic;phenicol antibiotic;tetracycline antibiotic	Multidrug	antibiotic efflux
3003057	smeF	smeF is an outer membrane multidrug efflux protein of the smeDEF complex in Stenotrophomonas maltophilia	resistance-nodulation-cell division (RND) antibiotic efflux pump	fluoroquinolone antibiotic;macrolide antibiotic;phenicol antibiotic;tetracycline antibiotic	Multidrug	antibiotic efflux
3003059	tmrB	tmrB is an ATP-binding tunicamycin resistance protein found in Bacillus subtilis	tunicamycin resistance protein	nucleoside antibiotic	Nucleoside	reduced permeability to antibiotic
3003060	tsnR	tsnR is a 23S ribosomal RNA methyltransferase that methylates adenosine-1067 to confer resistance to thiostrepton	non-erm 23S ribosomal RNA methyltransferase (A1067)	peptide antibiotic	Peptide	antibiotic target alteration
3003063	ykkC	ykkC is an SMR-type protein that is a subunit of the ykkCD efflux pump	small multidrug resistance (SMR) antibiotic efflux pump	aminoglycoside antibiotic;phenicol antibiotic;tetracycline antibiotic	Multidrug	antibiotic efflux
3003064	ykkD	ykkD is an SMR-type protein that is a subunit of the ykkCD efflux pump	small multidrug resistance (SMR) antibiotic efflux pump	aminoglycoside antibiotic;phenicol antibiotic;tetracycline antibiotic	Multidrug	antibiotic efflux
3003066	smeR	smeR is the responder component of a two component signal transduction system that includes smeS	resistance-nodulation-cell division (RND) antibiotic efflux pump	aminoglycoside antibiotic;cephalosporin;cephamycin;penam	Multidrug	antibiotic efflux
3003067	smeS	smeS is the protein kinase sensor component of a two component signal transduction system that includes smeR	resistance-nodulation-cell division (RND) antibiotic efflux pump	aminoglycoside antibiotic;cephalosporin;cephamycin;penam	Multidrug	antibiotic efflux
3003069	vanXYG	vanXYG is a vanXY variant found in the vanG gene cluster	glycopeptide resistance gene cluster;vanXY	glycopeptide antibiotic	Glycopeptide	antibiotic target alteration
3003070	vanXD	vanXD is a vanX variant found in the vanD gene cluster	glycopeptide resistance gene cluster;vanX	glycopeptide antibiotic	Glycopeptide	antibiotic target alteration
3003096	CfxA5	cfxA5 beta-lactamase is a class A beta-lactamase found in Bacteroides distasonis	CfxA beta-lactamase	cephamycin	Beta-lactam	antibiotic inactivation
3003097	CfxA6	cfxA6 beta-lactamase is a class A beta-lactamase found in an uncultured bacterium	CfxA beta-lactamase	cephamycin	Beta-lactam	antibiotic inactivation
3003105	dfrA3	dfrA3 is an integron-encoded dihydrofolate reductase found in Escherichia coli	trimethoprim resistant dihydrofolate reductase dfr	diaminopyrimidine antibiotic	Diaminopyrimidine	antibiotic target replacement
3003106	Erm(42)	Erm42 confers MLSb phenotype in Pasteurella multocida	Erm 23S ribosomal RNA methyltransferase	lincosamide antibiotic;macrolide antibiotic;streptogramin antibiotic	MLS	antibiotic target alteration
3003107	mef(B)	mef(B) is a macrolide efflux gene located in the vicinity of sul3 in Escherichia coli. There is also a mefB found in Streptococcus agalactiae that confers resistance to macrolides.	major facilitator superfamily (MFS) antibiotic efflux pump	macrolide antibiotic	MLS	antibiotic efflux
3003109	msrE	MsrE is an ABC-F subfamily protein expressed to Klebsiella pneumoniae that confers resistance to erythromycin and streptogramin B antibiotics. It is associated with plasmid DNA. It is also 100% identical to ABC-F type ribosomal protection protein Msr(E) which is in multiple species.	ABC-F ATP-binding cassette ribosomal protection protein	lincosamide antibiotic;macrolide antibiotic;oxazolidinone antibiotic;phenicol antibiotic;pleuromutilin antibiotic;streptogramin antibiotic;tetracycline antibiotic	Multidrug	antibiotic target protection
3003110	catB10	catB10 is an integron-encoded variant of the cat gene found in P. aeruginosa	chloramphenicol acetyltransferase (CAT)	phenicol antibiotic	Phenicol	antibiotic inactivation
3003111	lsaB	LsaB is an ABC-F subfamily protein expressed in Staphylococcus sciuri. It confers resistance to clindamycin.	ABC-F ATP-binding cassette ribosomal protection protein	lincosamide antibiotic;macrolide antibiotic;oxazolidinone antibiotic;phenicol antibiotic;pleuromutilin antibiotic;streptogramin antibiotic;tetracycline antibiotic	Multidrug	antibiotic target protection
3003112	lsaC	LsaC is an ABC-F subfamily protein expressed in Streptococcus agalactiae. It confers resistance to lincomycin, clindamycin, dalfopristin, and tiamulin	ABC-F ATP-binding cassette ribosomal protection protein	lincosamide antibiotic;macrolide antibiotic;oxazolidinone antibiotic;phenicol antibiotic;pleuromutilin antibiotic;streptogramin antibiotic;tetracycline antibiotic	Multidrug	antibiotic target protection
3003171	ACT-36	From the Lahey list of beta-lactamases.	ACT beta-lactamase	carbapenem;cephalosporin;cephamycin;penam	Beta-lactam	antibiotic inactivation
3003172	ACT-37	From the Lahey list of beta-lactamases.	ACT beta-lactamase	carbapenem;cephalosporin;cephamycin;penam	Beta-lactam	antibiotic inactivation
3003180	KPC-22	From the Lahey list of beta-lactamases.	KPC beta-lactamase	carbapenem;cephalosporin;monobactam;penam	Beta-lactam	antibiotic inactivation
3003197	aadA25	streptomycin/spectinomycin resistance gene found in Pasteurella multocida isolated from bovine respiratory tract	ANT(3'')	aminoglycoside antibiotic	Aminoglycoside	antibiotic inactivation
3003199	AAC(6')-Iak	AAC(6')-Iak is a 6'-N-aminoglycoside acetyltransferase-encoding gene isolated from a multidrug-resistant clinical isolate of Stenotrophomonas maltophilia	AAC(6')	aminoglycoside antibiotic	Aminoglycoside	antibiotic inactivation
3003200	AAC(6')-Ian	AAC(6')-Ian is an amikacin acetyltransferase gene found on a transferable plasmid of the Serratia marcescens strain NUBL-11663. It catalyzes the transfer of an acetyl group from acetyl coenzyme A onto an amine at the 6'-position of various aminoglycosides.	AAC(6')	aminoglycoside antibiotic	Aminoglycoside	antibiotic inactivation
3003202	TLA-1	TLA-1 is a beta-lactamase found in plasmids of clinical isolates of Escherichia coli strain R170 in Latin America. It preferentially hydrolyzed cephaloridine, cefotaxime, cephalothin, benzylpenicillin, and ceftazidime. The enzyme was markedly inhibited by sulbactam, tazobactam, and clavulanic acid.	TLA beta-lactamase	cephalosporin;fluoroquinolone antibiotic;monobactam	Beta-lactam	antibiotic inactivation
3003203	TLA-2	TLA-2 is a beta-lactamase is present on a plasmid isolated from an unidentified bacterial strain from a waste water treatment plant. The enzyme mostly hydrolyzes cephalosporins.	TLA beta-lactamase	cephalosporin;fluoroquinolone antibiotic;monobactam	Beta-lactam	antibiotic inactivation
3003204	TLA-3	TLA-3 is a beta-lactamase found in a transferable plasmid of Serratia marcescens clinical isolate. It confers resistance to ceftazidime, cefotaxime and cefepime, but not to cefmetazole and meropenem	TLA beta-lactamase	cephalosporin;fluoroquinolone antibiotic;monobactam	Beta-lactam	antibiotic inactivation
3003205	Erm(43)	Erm(43) is a macrolide, lincosamide, and streptogramin B resistance gene found in Staphylococcus lentus chromosome isolated from human, dog and chicken.	Erm 23S ribosomal RNA methyltransferase	lincosamide antibiotic;macrolide antibiotic;streptogramin antibiotic	MLS	antibiotic target alteration
3003206	lsaE	lsaE is an ABC-F subfamily protein found in porcine MRSA isolates. It confers resistance to pleuromutilin, lincosamide, and streptogramin A	ABC-F ATP-binding cassette ribosomal protection protein	lincosamide antibiotic;macrolide antibiotic;oxazolidinone antibiotic;phenicol antibiotic;pleuromutilin antibiotic;streptogramin antibiotic;tetracycline antibiotic	Multidrug	antibiotic target protection
3003250	bcrC	The bcrC gene product (BcrC) is an undecaprenyl pyrophosphate phosphatase originally isolated from Bacillus subtilis. When overexpressed it can confer resistance to bacitracin.	undecaprenyl pyrophosphate related proteins	peptide antibiotic	Peptide	antibiotic target alteration
3003318	Streptomyces rishiriensis parY mutant conferring resistance to aminocoumarin	point mutation on the Streptomyces rishiriensis parY resulting in aminocoumarin resistance	aminocoumarin resistant parY	aminocoumarin antibiotic	Aminocoumarin	antibiotic target alteration
3003440	mecB	A foreign PBP2 acquired by lateral gene transfer that able to perform peptidoglycan synthesis in the presence of beta-lactams.	methicillin resistant PBP2	carbapenem;cephalosporin;cephamycin;monobactam;penam	Beta-lactam	antibiotic target replacement
3003441	cfrA	CfrA is a chloramphenicol-florfenicol resistance gene and methyltransferase enzyme. Methylation of position 8 of A2503 in 23S rRNA confers resistance to chloramphenicol antibiotics first identified by Schwarz 2000 as cfr from Staphylococcus sciuri. Additional Oxazolidinone resistance mediated by the cfr gene in a human isolated was first reported from Colombia in linezolid- and methicillin-resist…	Cfr 23S ribosomal RNA methyltransferase	lincosamide antibiotic;phenicol antibiotic;pleuromutilin antibiotic;streptogramin antibiotic	Multidrug	antibiotic target alteration
3003548	mdtN	Multidrug resistance efflux pump. Could be involved in resistance to puromycin, acriflavine and tetraphenylarsonium chloride.	major facilitator superfamily (MFS) antibiotic efflux pump	acridine dye;nucleoside antibiotic	Multidrug	antibiotic efflux
3003549	mdtO	Multidrug resistance efflux pump. Could be involved in resistance to puromycin, acriflavine and tetraphenylarsonium chloride	major facilitator superfamily (MFS) antibiotic efflux pump	acridine dye;nucleoside antibiotic	Multidrug	antibiotic efflux
3003550	mdtP	Multidrug resistance efflux pump. Could be involved in resistance to puromycin, acriflavine and tetraphenylarsonium chloride	major facilitator superfamily (MFS) antibiotic efflux pump	acridine dye;nucleoside antibiotic	Multidrug	antibiotic efflux
3003551	emeA	A multidrug efflux pump from Enterococcus faecalis. There exist efflux activity of several antimicrobial agents such as DAPI, Hoechst 33342 and acriflavine. Efflux of DAPI via EmeA was strongly inhibited by reserpine.	multidrug and toxic compound extrusion (MATE) transporter	acridine dye	Multidrug	antibiotic efflux
3003558	y56 beta-lactamase	Class A beta-lactamase found in Yersinia enterocolitica biovar 1A	BlaA beta-lactamase	cephalosporin;penam	Beta-lactam	antibiotic inactivation
3003559	cepA	A beta-lactamase found in Bacteroides fragilis producing either low or high levels of the endogenous cephalosporinase activity	cepA beta-lactamase	cephalosporin	Beta-lactam	antibiotic inactivation
3003561	Sed-1	Sed-1 is a chromosomal-encoded class A beta-lactamase identified in Citrobacter sedlakii.	Sed beta-lactamase	cephalosporin;penam	Beta-lactam	antibiotic inactivation
3003564	EXO-1	Class A beta-lactamase found in Streptomyces albus G	EXO beta-lactamase	penam	Beta-lactam	antibiotic inactivation
3003576	eptA	PmrC mediates the modification of Lipid A by the addition of 4-amino-4-deoxy-L-arabinose (L-Ara4N) and phosphoethanolamine, resulting in a less negative cell membrane and decreased binding of polymyxin B.	pmr phosphoethanolamine transferase	peptide antibiotic	Peptide	antibiotic target alteration
3003577	ugd	PmrE is required for the synthesis and transfer of 4-amino-4-deoxy-L-arabinose (Ara4N) to Lipid A, which allows gram-negative bacteria to resist the antimicrobial activity of cationic antimicrobial peptides and antibiotics such as polymyxin	pmr phosphoethanolamine transferase	peptide antibiotic	Peptide	antibiotic target alteration
3003578	PmrF	PmrF is required for the synthesis and transfer of 4-amino-4-deoxy-L-arabinose (Ara4N) to Lipid A, which allows gram-negative bacteria to resist the antimicrobial activity of cationic antimicrobial peptides and antibiotics such as polymyxin. pmrF corresponds to 1 locus in Pseudomonas aeruginosa PAO1 and 1 locus in Pseudomonas aeruginosa LESB58.	pmr phosphoethanolamine transferase	peptide antibiotic	Peptide	antibiotic target alteration
3003583	basS	Histidine protein kinase sensor Lipid A modification gene; part of a two-component system involved in polymyxin resistance that senses high extracellular Fe(2+)	pmr phosphoethanolamine transferase	peptide antibiotic	Peptide	antibiotic efflux;antibiotic target alteration
3003600	OXA-444	Assigned by Lahey's list of beta-lactamases, no accessions or other information available	OXA beta-lactamase	cephalosporin;penam	Beta-lactam	antibiotic inactivation
3003605	OXA-449	Assigned by Lahey's list of beta-lactamases, no accessions or other information available	OXA beta-lactamase	cephalosporin;penam	Beta-lactam	antibiotic inactivation
3003607	OXA-451	Assigned by Lahey's list of beta-lactamases, no accessions or other information available	OXA beta-lactamase	cephalosporin;penam	Beta-lactam	antibiotic inactivation
3003609	OXA-453	Assigned by Lahey's list of beta-lactamases, no accessions or other information available	OXA beta-lactamase	cephalosporin;penam	Beta-lactam	antibiotic inactivation
3003620	OXA-464	Assigned by Lahey's list of beta-lactamases, no accessions or other information available	OXA beta-lactamase	cephalosporin;penam	Beta-lactam	antibiotic inactivation
3003665	NmcR	NmcR is a homolog of the LysR regulator found in Enterobacter cloacae that contribute to the regulation of NmcA beta-lactamase	NmcA beta-lactamase	carbapenem;cephalosporin;cephamycin;penam	Beta-lactam	antibiotic inactivation
3003670	PEDO-1	PEDO-1 is a subclass B3 metallo-beta lactamase isolated from Pedobacter roseus exhibiting resistance to carbapenems.	subclass B3 PEDO beta-lactamase	carbapenem	Beta-lactam	antibiotic inactivation
3003679	TriA	TriA is a membrane protein that is fused to TriB and both are required for the triclosan efflux pump function of TriABC-OpmH in P. aeruginosa.	resistance-nodulation-cell division (RND) antibiotic efflux pump	triclosan	Triclosan	antibiotic efflux
3003680	TriB	TriB is a membrane protein that is fused to TriA and both are required for the triclosan efflux pump function of TriABC-OpmH in P. aeruginosa.	resistance-nodulation-cell division (RND) antibiotic efflux pump	triclosan	Triclosan	antibiotic efflux
3003681	TriC	TriC is a resistance nodulation cell division (RND) transporter that is a part of TriABC-OpmH, a triclosan-specific efflux protein.	resistance-nodulation-cell division (RND) antibiotic efflux pump	triclosan	Triclosan	antibiotic efflux
3003682	OpmH	OpmH is an outer membrane efflux protein required for triclosan-specific efflux pump function.	resistance-nodulation-cell division (RND) antibiotic efflux pump	triclosan	Triclosan	antibiotic efflux
3003689	MCR-1.1	MCR-1 is a plasmid-borne phosphoethanolamine transferase that interferes with binding of colistin to the cell membrane via addition of phosphoethanolamine to lipid A, resulting reduction in negative charge of the cell membrane.	MCR phosphoethanolamine transferase	peptide antibiotic	Peptide	antibiotic target alteration
3003692	MexJ	mexJ is the membrane fusion protein of the MexJK multidrug efflux protein.	resistance-nodulation-cell division (RND) antibiotic efflux pump	macrolide antibiotic;tetracycline antibiotic;triclosan	Multidrug	antibiotic efflux
3003693	MexK	mexK is the inner membrane resistance-nodulation-cell division (RND) transporter in the MexJK multidrug efflux protein.	resistance-nodulation-cell division (RND) antibiotic efflux pump	macrolide antibiotic;tetracycline antibiotic;triclosan	Multidrug	antibiotic efflux
3003698	mexP	MexP is the membrane fusion protein of the MexPQ-OpmE multidrug efflux complex	resistance-nodulation-cell division (RND) antibiotic efflux pump	acridine dye;carbapenem;diaminopyrimidine antibiotic;macrolide antibiotic;phenicol antibiotic;tetracycline antibiotic	Multidrug	antibiotic efflux
3003699	mexQ	MexQ is the inner membrane transporter of the multidrug efflux pump MexPQ-OpmE.	resistance-nodulation-cell division (RND) antibiotic efflux pump	acridine dye;carbapenem;diaminopyrimidine antibiotic;macrolide antibiotic;phenicol antibiotic;tetracycline antibiotic	Multidrug	antibiotic efflux
3003700	opmE	opmE is an outer membrane factor protein that is part of the multidrug efflux pump MexPQ-OpmE.	resistance-nodulation-cell division (RND) antibiotic efflux pump	acridine dye;carbapenem;diaminopyrimidine antibiotic;macrolide antibiotic;phenicol antibiotic;tetracycline antibiotic	Multidrug	antibiotic efflux
3003704	mexM	mexM is the membrane fusion protein of the MexMN-OprM multidrug efflux complex.	resistance-nodulation-cell division (RND) antibiotic efflux pump	phenicol antibiotic	Multidrug	antibiotic efflux
3003705	mexN	MexN is the inner membrane transporter of the MexMN-OprM multidrug efflux complex.	resistance-nodulation-cell division (RND) antibiotic efflux pump	phenicol antibiotic	Multidrug	antibiotic efflux
3003710	MexL	MexL is a specific repressor of mexJK transcription and autoregulates its own expression.	resistance-nodulation-cell division (RND) antibiotic efflux pump	macrolide antibiotic;tetracycline antibiotic;triclosan	Multidrug	antibiotic efflux
3003714	PEDO-2	PEDO-2 is a subclass B3 metallo-beta lactamase isolated from Pedobacter borealis exhibiting carbapenem resistance.	subclass B3 PEDO beta-lactamase	carbapenem	Beta-lactam	antibiotic inactivation
3003716	CPS-1	CPS-1 is a subclass B3 metallo-beta lactamase isolated from Chyseobacterium piscium exhibiting carbapenem resistance.	CPS beta-lactamase	carbapenem	Beta-lactam	antibiotic inactivation
3003717	ESP-1	ESP-1 is a subclass B3 metallo-beta lactamase isolated from Epilithonimonas tenax conferring resistance to carbapenems.	ESP beta-lactamase	carbapenem	Beta-lactam	antibiotic inactivation
3003718	MSI-1	MSI-1 is a subclass B3 metallo-beta lactamase isolated from Massilia oculi conferring resistance to carbapenems.	MSI beta-lactamase	carbapenem	Beta-lactam	antibiotic inactivation
3003720	SPG-1	SPG-1 is a subclass B3 metallo-beta lactamase isolated from Sphingomonas sp.	SPG beta-lacatamase	carbapenem	Beta-lactam	antibiotic inactivation
3003723	vanI	VanI is a D-Ala-D-Lac ligase that reduces vancomycin binding affinity, helping to confer vancomycin resistance as part of the VanI resistance gene cluster in Desulfitobacterium spp. and Desulfosporosinus spp.	glycopeptide resistance gene cluster;van ligase	glycopeptide antibiotic	Glycopeptide	antibiotic target alteration
3003724	vanWI	VanWI is a vanW variant found in the vanI gene cluster	glycopeptide resistance gene cluster;vanW	glycopeptide antibiotic	Glycopeptide	antibiotic target alteration
3003725	vanXI	VanXI is a VanX variant found in the VanI glycopeptide resistance gene cluster. It is a D-Ala-D-Ala dipeptidase.	glycopeptide resistance gene cluster;vanX	glycopeptide antibiotic	Glycopeptide	antibiotic target alteration
3003727	vanKI	VanKI is a peptidoglycan bridge formation protein also known as FemAB that is part of the VanI glycopeptide resistance gene cluster.	glycopeptide resistance gene cluster;vanK	glycopeptide antibiotic	Glycopeptide	antibiotic target alteration
3003728	vanRI	VanRI is the regulatory transcriptional activator in the VanSR regulator within the VanI glycopeptide resistance gene cluster.	glycopeptide resistance gene cluster;vanR	glycopeptide antibiotic	Glycopeptide	antibiotic target alteration
3003730	Bifidobacterium ileS conferring resistance to mupirocin	Bifidobacteria have an intrinsically resistant form of ileS (isoleucyl-tRNA synthetase) that confers resistance to mupirocin.	antibiotic-resistant isoleucyl-tRNA synthetase (ileS)	mupirocin	Mupirocin	antibiotic target alteration
3003733	fusC	FusC is a fusidic acid resistance gene enabling ribosomal translocase EF-G dissociation from the ribosome that has been detected in Staphylococcus aureus and Staphylococcus intermedius. Its mechanism is believed to be similar to fusB due to its high level of sequence homology.	fusidic acid inactivation enzyme	fusidic acid	Fusidic acid	antibiotic inactivation
3003744	vatF	vatF is a streptogramin A acetyl transferase gene isolated from the chromosome of Yersinia enterocolitica.	streptogramin vat acetyltransferase	streptogramin antibiotic	MLS	antibiotic inactivation
3003745	mefC	mefC is a macrolide efflux gene isolated from a plasmid in Photobacterium damselae.	major facilitator superfamily (MFS) antibiotic efflux pump	macrolide antibiotic	MLS	antibiotic efflux
3003746	optrA	OptrA is a member of the ABC-F protein subfamily that confers resistance to oxazolidinones. The gene encoding the protein was originally isolated from a plasmid in Enterococcus faecalis and Enterococcus faecium.	ABC-F ATP-binding cassette ribosomal protection protein	lincosamide antibiotic;macrolide antibiotic;oxazolidinone antibiotic;phenicol antibiotic;pleuromutilin antibiotic;streptogramin antibiotic;tetracycline antibiotic	Multidrug	antibiotic target protection
3003748	oleC	oleC is an ABC transporter isolated from Streptomyces antibioticus and is involved in oleandomycin secretion.	ATP-binding cassette (ABC) antibiotic efflux pump	macrolide antibiotic	MLS	antibiotic efflux
3003749	salA	salA is an ABC-F subfamily protein gene isolated from the chromosome of Staphylococcus sciuri conferring resistance to lincosamides and streptogramins.	ABC-F ATP-binding cassette ribosomal protection protein	lincosamide antibiotic;macrolide antibiotic;oxazolidinone antibiotic;phenicol antibiotic;pleuromutilin antibiotic;streptogramin antibiotic;tetracycline antibiotic	Multidrug	antibiotic target protection
3003762	lnuE	lnuE encodes a lincosamide resistance gene isolated from Streptococcus suis that was truncated by an ISEnfa5-cfr-ISEnfa5 segment insertion. It shares the closest sequence similarity to lnuA.	lincosamide nucleotidyltransferase (LNU)	lincosamide antibiotic	MLS	antibiotic inactivation
3003767	mphM	mphM is a chromosomally-encoded macrolide phosphotransferases that inactivate 14-, 15- and 16-membered macrolides.	macrolide phosphotransferase (MPH)	macrolide antibiotic	MLS	antibiotic inactivation
3003770	Listeria monocytogenes mprF	MprF is a integral membrane protein that modifies the negatively-charged phosphatidylglycerol on the membrane surface. This confers resistance to cationic peptides that disrupt the cell membrane, including defensins.	defensin resistant mprF	peptide antibiotic	Peptide	antibiotic target alteration
3003772	Brucella suis mprF	MprF is a integral membrane protein that modifies the negatively-charged phosphatidylglycerol on the membrane surface. This confers resistance to cationic peptides that disrupt the cell membrane, including defensins.	defensin resistant mprF	peptide antibiotic	Peptide	antibiotic target alteration
3003773	Clostridium perfringens mprF	MprF is a integral membrane protein that modifies the negatively-charged phosphatidylglycerol on the membrane surface. This confers resistance to cationic peptides that disrupt the cell membrane, including defensins.	defensin resistant mprF	peptide antibiotic	Peptide	antibiotic target alteration
3003774	Streptococcus agalactiae mprF	MprF is a integral membrane protein that modifies the negatively-charged phosphatidylglycerol on the membrane surface. This confers resistance to cationic peptides that disrupt the cell membrane, including defensins.	defensin resistant mprF	peptide antibiotic	Peptide	antibiotic target alteration
3003785	Chlamydia trachomatis intrinsic murA conferring resistance to fosfomycin	Chlamydia murA confers intrinsic resistance to fosfomycin. The presence of an aspartic acid residue in place of the critical cysteine at position 119 that enables fosfomycin binding is believed to be responsible for this intrinsic resistance.	antibiotic-resistant murA transferase	fosfomycin	Fosfomycin	antibiotic target alteration
3003801	bcr-1	Transmembrane protein which expels bicyclomycin from the cell, leading to bicyclomycin resistance. Identified in Pseudomonas aeruginosa strains responsible for outbreaks in Brazil, often appearing with blaSPM-1, another bicyclomycin resistance gene	major facilitator superfamily (MFS) antibiotic efflux pump	bicyclomycin	Bicyclomycin	antibiotic efflux
3003811	adeC	AdeC is the outer membrane factor of the AdeABC multidrug efflux complex. It can be replaced by other outer membrane channels, and is not essential for antibiotic resistance.	resistance-nodulation-cell division (RND) antibiotic efflux pump	glycylcycline;tetracycline antibiotic	Multidrug	antibiotic efflux
3003835	cdeA	Clostridioides difficile and Escherichia coli multidrug efflux transporter with antiporter function. Confers resistance to fluoroquinolones in E. coli and acriflavin in Clostridioides difficile.	multidrug and toxic compound extrusion (MATE) transporter	acridine dye;fluoroquinolone antibiotic	Multidrug	antibiotic efflux
3003836	qacH	qacH is a subunit of the qac multidrug efflux pump in Vibrio cholerae	small multidrug resistance (SMR) antibiotic efflux pump	fluoroquinolone antibiotic	Multidrug	antibiotic efflux
3003838	gadW	GadW is an AraC-family regulator that promotes mdtEF expression to confer multidrug resistance. GadW inhibits GadX-dependent activation. GadW clearly represses gadX and, in situations where GadX is missing, activates gadA and gadBC.	resistance-nodulation-cell division (RND) antibiotic efflux pump	fluoroquinolone antibiotic;macrolide antibiotic;penam	Multidrug	antibiotic efflux
3003841	kdpE	kdpE is a transcriptional activator that is part of the two-component system KdpD/KdpE that is studied for its regulatory role in potassium transport and has been identified as an adaptive regulator involved in the virulence and intracellular survival of pathogenic bacteria. kdpE regulates a range of virulence loci through direct promoter binding.	kdpDE	aminoglycoside antibiotic	Aminoglycoside	antibiotic efflux
3003847	ADC-1	ADC-1 is a beta-lactamase found in Acinetobacter baumannii.	ADC beta-lactamase without carbapenemase activity	cephalosporin	Beta-lactam	antibiotic inactivation
3003854	ADC-8	ADC-8 is a beta-lactamase found in Acinetobacter sp.	ADC beta-lactamase without carbapenemase activity	cephalosporin	Beta-lactam	antibiotic inactivation
3003860	ADC-16	ADC-16 is a beta-lactamase found in Acinetobacter pittii.	ADC beta-lactamase without carbapenemase activity	cephalosporin	Beta-lactam	antibiotic inactivation
3003867	ADC-23	ADC-23 is a beta-lactamase found in Acinetobacter pittii.	ADC beta-lactamase without carbapenemase activity	cephalosporin	Beta-lactam	antibiotic inactivation
3003873	ADC-42	ADC-42 is a beta-lactamase found in Acinetobacter pittii.	ADC beta-lactamase without carbapenemase activity	cephalosporin	Beta-lactam	antibiotic inactivation
3003880	ADC-74	ADC-74 is a beta-lactamase found in Acinetobacter baumannii.	ADC beta-lactamase without carbapenemase activity	cephalosporin	Beta-lactam	antibiotic inactivation
3003883	ADC-77	ADC-77 is a beta-lactamase found in Acinetobacter baumannii.	ADC beta-lactamase without carbapenemase activity	cephalosporin	Beta-lactam	antibiotic inactivation
3003894	Rm3	Rm3 is a class B3 metallo-beta-lactamase isolated from a metagenomic soil sample in Yorkshire, United Kingdom, shown to confer resistance to clinically used penicillins, cephalosporins, and carbapenems.	Rm3 family beta-lactamase	carbapenem;cephalosporin;penam	Beta-lactam	antibiotic inactivation
3003905	ANT(4')-Ib	Kanamycin nucleotidyltransferase sequence from Staphylococcus aureus plasmid. Confers resistance to kanamycin, neomycin and other aminoglycosides	ANT(4')	aminoglycoside antibiotic	Aminoglycoside	antibiotic inactivation
3003907	cipA	Cfr-like methyltransferase enzyme conferring resistance to multiple clinically relevant antibiotic classes.	Cfr 23S ribosomal RNA methyltransferase	lincosamide antibiotic;phenicol antibiotic;pleuromutilin antibiotic;streptogramin antibiotic	Multidrug	antibiotic target alteration
3003908	Erm(47)	Chromosome-encoded gene conferring MLSB resistance. Identified from Helcococcus kunzii.	Erm 23S ribosomal RNA methyltransferase	lincosamide antibiotic;macrolide antibiotic;streptogramin antibiotic	MLS	antibiotic target alteration
3003918	apmA	Plasmid-borne apramycin-resistant aminocyclitol acetyltransferase gene identified from bovine MRSA.	amp acetyltransferase	aminoglycoside antibiotic	Aminoglycoside	antibiotic inactivation
3003920	pgpB	A gene that produces the protein lipid A 4'-phosphatase	lipid A phosphatase	peptide antibiotic	Peptide	antibiotic target alteration
3003922	oqxA	RND efflux pump conferring resistance to fluoroquinolone	resistance-nodulation-cell division (RND) antibiotic efflux pump	diaminopyrimidine antibiotic;fluoroquinolone antibiotic;glycylcycline;nitrofuran antibiotic;tetracycline antibiotic	Multidrug	antibiotic efflux
3003923	oqxB	RND efflux pump conferring resistance to fluoroquinolone	resistance-nodulation-cell division (RND) antibiotic efflux pump	diaminopyrimidine antibiotic;fluoroquinolone antibiotic;glycylcycline;nitrofuran antibiotic;tetracycline antibiotic	Multidrug	antibiotic efflux
3003942	abcA	AbcA is a multidrug resistant ABC transporter that confers resistance to methicillin, daptomycin, cefotaxime, and moenomycin.	ATP-binding cassette (ABC) antibiotic efflux pump	cephalosporin;penam;peptide antibiotic	Multidrug	antibiotic efflux
3003948	efrA	efrA is a part of the EfrAB efflux pump, and both efrA and efrB are necessary to confer drug resistance.	ATP-binding cassette (ABC) antibiotic efflux pump	fluoroquinolone antibiotic;macrolide antibiotic;rifamycin antibiotic	Multidrug	antibiotic efflux
3003949	efrB	efrB is a part of the EfrAB efflux pump, and both efrA and efrB are necessary to confer multidrug resistance.	ATP-binding cassette (ABC) antibiotic efflux pump	fluoroquinolone antibiotic;macrolide antibiotic;rifamycin antibiotic	Multidrug	antibiotic efflux
3003950	msbA	MsbA is a multidrug resistance transporter homolog from E. coli and belongs to a superfamily of transporters that contain an adenosine triphosphate (ATP) binding cassette (ABC) which is also called a nucleotide-binding domain (NBD). MsbA is a member of the MDR-ABC transporter group by sequence homology. MsbA transports lipid A, a major component of the bacterial outer cell membrane, and is the on…	ATP-binding cassette (ABC) antibiotic efflux pump	nitroimidazole antibiotic	Multidrug	antibiotic efflux
3003952	YojI	YojI mediates resistance to the peptide antibiotic microcin J25 when it is expressed from a multicopy vector. YojI is capable of pumping out microcin molecules. The outer membrane protein TolC in addition to YojI is required for export of microcin J25 out of the cell. Microcin J25 is thus the first known substrate for YojI.	ATP-binding cassette (ABC) antibiotic efflux pump	peptide antibiotic	Peptide	antibiotic efflux
3003953	hmrM	hmrM is a multidrug efflux pump belonging to the MATE family and functions as a Na+/drug antiporter.	multidrug and toxic compound extrusion (MATE) transporter	acridine dye;fluoroquinolone antibiotic	Multidrug	antibiotic efflux
3003954	efmA	efmA is an MFS transporter permease in E. faecium.	major facilitator superfamily (MFS) antibiotic efflux pump	fluoroquinolone antibiotic;macrolide antibiotic	Multidrug	antibiotic efflux
3003955	efpA	efpA is an MFS transporter found in Mycobacterium tuberculosis.	major facilitator superfamily (MFS) antibiotic efflux pump	isoniazid;rifamycin antibiotic	Multidrug	antibiotic efflux
3003961	farA	farA is the membrane fusion protein that is part of the farAB efflux pump.	major facilitator superfamily (MFS) antibiotic efflux pump	antibacterial free fatty acids	Multidrug	antibiotic efflux
3003962	farB	farB is the cytoplasmic transporter protein that is part of the farAB efflux pump. farB corresponds to 3 loci in Pseudomonas aeruginosa PAO1 and 3 loci in Pseudomonas aeruginosa LESB58.	major facilitator superfamily (MFS) antibiotic efflux pump	antibacterial free fatty acids	Multidrug	antibiotic efflux
3003964	hp1181	hp1181 is a translocase that is part of the MFS efflux pump family. It is found in H. pylori and has role in the active efflux of antibiotics.	major facilitator superfamily (MFS) antibiotic efflux pump	fluoroquinolone antibiotic;nitroimidazole antibiotic;tetracycline antibiotic	Multidrug	antibiotic efflux
3003967	lfrA	lfrA is involved in the active efflux of quinolones and is found in Mycobacteroides abscessus.	major facilitator superfamily (MFS) antibiotic efflux pump	fluoroquinolone antibiotic	Fluoroquinolone	antibiotic efflux
3003969	lmrP	lmrP is a proton motive force-dependent drug transporter that is part of the MFS efflux pump family.	major facilitator superfamily (MFS) antibiotic efflux pump	lincosamide antibiotic;macrolide antibiotic;streptogramin antibiotic;tetracycline antibiotic	Multidrug	antibiotic efflux
3003971	Erm(44)v	Variant of Erm(44)v isolated from Staphylococcus saprophyticus, confers resistance to lincosamide and macrolide antibiotics but not streptogramins.	Erm 23S ribosomal RNA methyltransferase	lincosamide antibiotic;macrolide antibiotic;streptogramin antibiotic	MLS	antibiotic target alteration
3003980	tetA(58)	TetA(58) is a Tetracycline efflux pump described in Paenibacillus sp. LC231, a strain of Paenibacillus isolated from Lechuguilla Cave, NM, USA. Described by Pawlowski et al. 2016.	major facilitator superfamily (MFS) antibiotic efflux pump	tetracycline antibiotic	Tetracycline	antibiotic efflux
3003981	tetB(58)	Tetracycline resistant TetB(58) efflux pump found in Paenibacillus sp. LC231, a strain of Paenibacillus isolated from Lechuguilla Cave, NM, USA. Described by Pawlowski et al. 2016.	major facilitator superfamily (MFS) antibiotic efflux pump	tetracycline antibiotic	Tetracycline	antibiotic efflux
3003982	LlmA 23S ribosomal RNA methyltransferase	Lincosamide (Clindamycin) resistant (putative) ribosomal methyltransferase related to the RlmK 23S rRNA methyltransferase COG family. Detected in Paenibacillus sp. LC231, an isolated strain of Paenibacillus found in Lechuguilla Cave, NM, USA. Described by Pawlowski et al. 2016.	Llm 23S ribosomal RNA methyltransferase	lincosamide antibiotic	MLS	antibiotic target alteration
3003983	CatU	Chloramphenicol acetyltransferase conferring resistance to phenicol antibiotics detected in Paenibacillus sp. LC231, an isolated strain of Paenibacillus from Lechuguilla Cave, NM, USA. Described by Pawlowski et al. 2016.	chloramphenicol acetyltransferase (CAT)	phenicol antibiotic	Phenicol	antibiotic inactivation
3003984	BahA	Bacitracin amidohydrolase found in Paenibacillus sp. LC231, an isolated strain of Paenibacillus from Lechuguilla Cave, NM, USA. Confers resistance by bacitracin inactivation through amidohydrolysis. Described by Pawlowski et al. 2016.	Bah amidohydrolase	peptide antibiotic	Peptide	antibiotic inactivation
3003986	TaeA	Pleuromutilin (Tiamulin) ABC efflux pump found in Paenibacillus sp. LC231, a strain of Paenibacillus isolated from Lechuguilla Cave, NM, USA. Confers resistance to pleuromutilin antibiotics. Described by Pawlowski et al. 2016.	ATP-binding cassette (ABC) antibiotic efflux pump	pleuromutilin antibiotic	Pleuromutilin	antibiotic efflux
3003987	VatI	Streptogramin A acetyltransferase found in Paenibacillus sp. LC231, isolated from Lechuguilla Cave, NM, USA. Confers resistance to streptogramin A antibiotics. Described by Pawlowski et al. 2016.	streptogramin vat acetyltransferase	streptogramin antibiotic	MLS	antibiotic inactivation
3003988	AAC(2')-IIb	AAC(2')-IIb is an intrinsic Kasugamycin 2' acetyltransferase protein found in Paenibacillus sp. LC231, a strain of Paenibacillus isolated from Lechuguilla Cave, NM, USA. Confers resistance to aminoglycoside antibiotics, including kasugamycin. Described by Pawlowski et al. 2016.	AAC(2')	aminoglycoside antibiotic	Aminoglycoside	antibiotic inactivation
3003989	AAC(6')-34	AAC(6')-34 is an aminoglycoside 6'-phosphotransferase found in Paenibacillus sp. LC231, a strain of Paenibacillus from Lechuguilla Cave, NM, USA. Confers resistance to aminoglycoside antibiotics. Described by Pawlowski et al. 2016.	AAC(6')	aminoglycoside antibiotic	Aminoglycoside	antibiotic inactivation
3003990	vgbC	VgbC is a streptogramin B-type lyase found in Paenibacillus sp. LC231, a strain of Paenibacillus isolated from Lechuguilla Cave, NM, USA. Confers resistance to streptogramin B-type antibiotics by linearization of the lactone ring on an ester bond, resulting in antibiotic inactivation. Described by Pawlowski et al. 2016.	streptogramin vgb lyase	streptogramin antibiotic	MLS	antibiotic inactivation
3003992	rphB	rphB is a rifampin phosphotransferase protein found in Paenibacillus sp. LC231, a strain of Paenibacillus isolated from Lechuguilla Cave, NM, USA. Confers resistance to rifamycin antibiotics, specifically rifampin, through rifampin inactivation. Described by Pawlowski et al. 2016.	rifampin phosphotransferase	rifamycin antibiotic	Rifamycin	antibiotic inactivation
3003994	cpaA	cpaA is a capreomycin acetyltransferase protein found in Paenibacillus sp. LC231, an isolated strain of Paenibacillus in Lechuguilla Cave, NM, USA. Confers resistance to capreomycin, an aminoglycoside antibiotic. Described by Pawlowski et al. 2016.	cpa acetyltransferase	aminoglycoside antibiotic	Aminoglycoside	antibiotic inactivation
3004032	tetA(46)	tetA(46) is a subunit of tetAB(46), a heterodimeric ABC transporter, that is required for conferring tetracycline resistance in Streptococcus australis isolated from the oral cavity.	ATP-binding cassette (ABC) antibiotic efflux pump	tetracycline antibiotic	Tetracycline	antibiotic efflux
3004033	tetB(46)	tetB(46) is a subunit of tetAB(46), a heterodimeric ABC transporter, that is required for conferring tetracycline resistance in Streptococcus australis isolated from the oral cavity.	ATP-binding cassette (ABC) antibiotic efflux pump	tetracycline antibiotic	Tetracycline	antibiotic efflux
3004035	tetA(60)	tetA(60) is a subunit of tetAB(60), an ABC transporter that confers resistance to tetracycline and tigercycline identified by screening a human saliva metagenomic library in Escherichia coli, which is required for resistance.	ATP-binding cassette (ABC) antibiotic efflux pump	tetracycline antibiotic	Tetracycline	antibiotic efflux
3004036	tetB(60)	tetB(60) is a subunit of tetAB(60), an ABC transporter that confers resistance to tetracycline and tigercycline identified by screening a human saliva metagenomic library in Escherichia coli, which is required for resistance.	ATP-binding cassette (ABC) antibiotic efflux pump	tetracycline antibiotic	Tetracycline	antibiotic efflux
3004038	Pseudomonas aeruginosa emrE	EmrE is a small multidrug transporter that functions as a homodimer and that couples the efflux of small polyaromatic cations from the cell with the import of protons down an electrochemical gradient. Confers resistance to tetraphenylphosphonium, methyl viologen, gentamicin, kanamycin, and neomycin.	small multidrug resistance (SMR) antibiotic efflux pump	aminoglycoside antibiotic	Multidrug	antibiotic efflux
3004039	Escherichia coli emrE	Member of the small MDR (multidrug resistance) family of transporters; in Escherichia coli this protein provides resistance against a number of positively charged compounds including ethidium bromide and erythromycin; proton-dependent secondary transporter which exchanges protons for compound translocation	small multidrug resistance (SMR) antibiotic efflux pump	macrolide antibiotic	MLS	antibiotic efflux
3004041	Klebsiella pneumoniae acrA	AcrA is a subunit of the AcrAB multidrug efflux system that in K. pneumoniae, which is encoded by the acrRAB operon.	resistance-nodulation-cell division (RND) antibiotic efflux pump	cephalosporin;fluoroquinolone antibiotic;glycylcycline;penam;phenicol antibiotic;rifamycin antibiotic;tetracycline antibiotic;triclosan	Multidrug	antibiotic efflux
3004042	Enterobacter cloacae acrA	AcrA is a subunit of the AcrAB-TolC multidrug efflux system that in E. cloacae.	resistance-nodulation-cell division (RND) antibiotic efflux pump	cephalosporin;fluoroquinolone antibiotic;glycylcycline;penam;phenicol antibiotic;rifamycin antibiotic;tetracycline antibiotic;triclosan	Multidrug	antibiotic efflux
3004043	Escherichia coli acrA	AcrA is a subunit of the AcrAB-TolC multidrug efflux system that in E. coli.	resistance-nodulation-cell division (RND) antibiotic efflux pump	cephalosporin;fluoroquinolone antibiotic;glycylcycline;penam;phenicol antibiotic;rifamycin antibiotic;tetracycline antibiotic;triclosan	Multidrug	antibiotic efflux
3004054	Pseudomonas aeruginosa CpxR	CpxR is directly involved in activation of expression of RND efflux pump MexAB-OprM in P. aeruginosa. CpxR is required to enhance mexAB-oprM expression and drug resistance, in the absence of repressor MexR.	resistance-nodulation-cell division (RND) antibiotic efflux pump	aminocoumarin antibiotic;aminoglycoside antibiotic;carbapenem;cephalosporin;cephamycin;diaminopyrimidine antibiotic;fluoroquinolone antibiotic;macrolide antibiotic;monobactam;penam;penem;peptide antibiotic;phenicol antibiotic;sulfonamide antibiotic;tetracycline antibiotic	Multidrug	antibiotic efflux
3004063	EdeQ	EdeQ is an N-acetyltransferase enzyme that confers high-level self-resistance to edeine in Brevibacillus brevis, a natural edeine producer. EdeQ converts active edeine to N-acetyledeine, which is ineffective in vivo.	Edeine acetyltransferase	peptide antibiotic;polyamine antibiotic	Multidrug	antibiotic inactivation
3004072	OpmB	OpmB is an outer membrane efflux protein in Pseudomonas aeruginosa that shows functional cooperation with MuxABC, to form the efflux pump system MuxABC-OpmB.	resistance-nodulation-cell division (RND) antibiotic efflux pump	aminocoumarin antibiotic;macrolide antibiotic;monobactam;tetracycline antibiotic	Multidrug	antibiotic efflux
3004073	MuxA	MuxA is a membrane fusion protein component of the efflux pump system MuxABC-OpmB in Pseudomonas aeruginosa.	resistance-nodulation-cell division (RND) antibiotic efflux pump	aminocoumarin antibiotic;macrolide antibiotic;monobactam;tetracycline antibiotic	Multidrug	antibiotic efflux
3004074	MuxB	MuxB is one of the two necessary RND components in the Pseudomonas aeruginosa efflux pump system MuxABC-OpmB.	resistance-nodulation-cell division (RND) antibiotic efflux pump	aminocoumarin antibiotic;macrolide antibiotic;monobactam;tetracycline antibiotic	Multidrug	antibiotic efflux
3004075	MuxC	MuxC is one of the two necessary RND components of the MuxABC-OpmB efflux pumps system in Pseudomonas aeruginosa.	resistance-nodulation-cell division (RND) antibiotic efflux pump	aminocoumarin antibiotic;macrolide antibiotic;monobactam;tetracycline antibiotic	Multidrug	antibiotic efflux
3004077	PmpM	PmpM is a multidrug efflux pump belonging to the MATE family of Pseudomonas aeruginosa. PmpM is an H+ drug antiporter and is the first reported case of an H+ coupled efflux pump in the MATE family. PmpM confers resistance to fluoroquinolones, fradiomycin, benzalkonium chloride, chlorhexidine gluconate, ethidium bromide, tetraphenylphosphonium chloride (TPPCl), and rhodamine 6G.	multidrug and toxic compound extrusion (MATE) transporter	aminoglycoside antibiotic;benzalkonium chloride;fluoroquinolone antibiotic	Multidrug	antibiotic efflux
3004087	APH(3')-IX	APH(3')-IX is an aminoglycoside phosphoryltransferase that acts on the 3-OH target of aminoglycosides.	APH(3')	aminoglycoside antibiotic	Aminoglycoside	antibiotic inactivation
3004089	ANT(3'')-IIa	ANT(3'')-IIa is a aminoglycoside nucleotidyltransferase identified in Acinetobacter spp. via horizontal gene transfer mechanisms.	ANT(3'')	aminoglycoside antibiotic	Aminoglycoside	antibiotic inactivation
3004091	ANT(3'')-IIc	ANT(3'')-IIc is a aminoglycoside nucleotidyltransferase identified in Acinetobacter spp. via horizontal gene transfer mechanisms.	ANT(3'')	aminoglycoside antibiotic	Aminoglycoside	antibiotic inactivation
3004094	Erm(48)	Erm(48) is a macrolide-lincosamide-streptogramin resistance gene identified on resistance plasmid pJW2311.	Erm 23S ribosomal RNA methyltransferase	lincosamide antibiotic;macrolide antibiotic;streptogramin antibiotic	MLS	antibiotic target alteration
3004099	LpeA	LpeA is a subunit of the LpeAB efflux pump in Legionella pneumophila, which is homologous to AcrA in E. coli.	resistance-nodulation-cell division (RND) antibiotic efflux pump	macrolide antibiotic	MLS	antibiotic efflux
3004100	LpeB	LpeB is a subunit of the LpeAB efflux pump in Legionella pneumophila, which is homologous to AcrB in E. coli.	resistance-nodulation-cell division (RND) antibiotic efflux pump	macrolide antibiotic	MLS	antibiotic efflux
3004103	QepA2	QepA2 is a plasmid-mediated quinolone resistance pump found in an Escherichia coli isolate from France	major facilitator superfamily (MFS) antibiotic efflux pump	fluoroquinolone antibiotic	Fluoroquinolone	antibiotic efflux
3004107	Pseudomonas aeruginosa soxR	SoxR is a redox-sensitive transcriptional activator that induces expression of a small regulon that includes the RND efflux pump-encoding operon mexGHI-opmD. SoxR was shown to be activated by pyocyanin.	ATP-binding cassette (ABC) antibiotic efflux pump;major facilitator superfamily (MFS) antibiotic efflux pump;resistance-nodulation-cell division (RND) antibiotic efflux pump	acridine dye;cephalosporin;fluoroquinolone antibiotic;glycylcycline;penam;phenicol antibiotic;rifamycin antibiotic;tetracycline antibiotic;triclosan	Multidrug	antibiotic efflux;antibiotic target alteration
3004110	MCR-2.1	MCR-2 is a plasmid-borne phosphoethanolamine transferase that interferes with binding of colistin to the cell membrane via addition of phosphoethanolamine to lipid A, resulting in reduction of the negative charge of the cell membrane. Originally identified in a Belgian sample of Escherichia coli by Xavier et al, (2016).	MCR phosphoethanolamine transferase	peptide antibiotic	Peptide	antibiotic target alteration
3004111	FosA6	fosA6 is a plasmid-encoded enzyme that confers resistance to fosfomycin in Escherichia coli by breaking the epoxide ring of the molecule.	fosfomycin thiol transferase	fosfomycin	Fosfomycin	antibiotic inactivation
3004113	FosA7	fosA7 is an enzyme that confers resistance to fosfomycin in Escherichia coli by breaking the epoxide ring of the molecule.	fosfomycin thiol transferase	fosfomycin	Fosfomycin	antibiotic inactivation
3004122	Klebsiella pneumoniae OmpK37	Klebsiella pneumoniae outer membrane porin protein. Is preferentially detected in porin-deficient strains. Functional characterization of this new porin revealed a narrower pore than those of porins OmpK35 and OmpK36, which did not allow penetration by certain beta-lactams. Also, when a resistant strain expresses porin OmpK37 is less susceptible to cefotaxime and cefoxitin than when it is express…	General Bacterial Porin with reduced permeability to beta-lactams	carbapenem;cephalosporin;cephamycin;monobactam;penam;penem	Beta-lactam	reduced permeability to antibiotic
3004123	Burkholderia pseudomallei Omp38	Heterologous expression of Burkholderia pseudomallei Omp38 (BpsOmp38) in Omp-deficient E. coli host cells lowers their permeability and in consequence, their antimicrobial susceptibility to penicillin G, cefoxitin, ceftazidime and imipenem.	General Bacterial Porin with reduced permeability to beta-lactams	carbapenem;cephalosporin;cephamycin;monobactam;penam;penem	Beta-lactam	reduced permeability to antibiotic
3004142	OprZ	OprZ is the outer membrane component of the AxyXY-OprZ efflux pump system in Achromobacter spp.	resistance-nodulation-cell division (RND) antibiotic efflux pump	aminoglycoside antibiotic;cephalosporin;fluoroquinolone antibiotic;macrolide antibiotic	Multidrug	antibiotic efflux
3004143	AxyX	AxyX is the inner membrane transporter of the AxyXY-OprZ efflux pump system in Achromobacter spp.	resistance-nodulation-cell division (RND) antibiotic efflux pump	aminoglycoside antibiotic;cephalosporin;fluoroquinolone antibiotic;macrolide antibiotic	Multidrug	antibiotic efflux
3004144	AxyY	AxyY is the periplasmic adaptor protein of the AxyXY-OprZ efflux pump system in Achromobacter spp.	resistance-nodulation-cell division (RND) antibiotic efflux pump	aminoglycoside antibiotic;cephalosporin;fluoroquinolone antibiotic;macrolide antibiotic	Multidrug	antibiotic efflux
3004146	cfrC	A cfr-like 23S rRNA methyltransferase shown to confer resistance to linezolid and phenicol antibiotics, including florfenicol and chloramphenicol, in Clostridium.	Cfr 23S ribosomal RNA methyltransferase	phenicol antibiotic	Phenicol	antibiotic target alteration
3004185	mecD	mecD is a PBP2a variant identified on a genomic resistance island in Macrococcus caseolyticus. MecD confers resistance to methicillin and other beta-lactam antibiotics through the production of an alternative low-affinity PBP. First described by Schwendener et al. 2017 and identified from canine and bovine sources.	methicillin resistant PBP2	carbapenem;cephalosporin;cephamycin;monobactam;penam	Beta-lactam	antibiotic target replacement
3004191	APH(2'')-If	Aminoglycoside 2''-phosphotransferase identified from the gram-negative pathogen Campylobacter jejuni. APH(2'')-If was shown to confer resistance to 4,6-disubstituted antibiotics kanamycin, tobramycin, dibekacin, gentamicin and sisomicin through antibiotic phosphorylation. Described by Toth et al. 2013.	APH(2'')	aminoglycoside antibiotic	Aminoglycoside	antibiotic inactivation
3004213	GOB-18	GOB-18 is a member of subclass B3 GOB family of beta-lactamases isolated from Elizabethkingia meningoseptica. GOB-18 is unlike other subclass B3 beta-lactamases as it is fully active against a broad range of beta-lactam substrates using a single Zn(II) ion in its active site.	GOB beta-lactamase	carbapenem;cephalosporin;penam	Beta-lactam	antibiotic inactivation
3004253	vanUG	vanUG is a vanG variant found in the vanG gene cluster.	glycopeptide resistance gene cluster;vanU	glycopeptide antibiotic	Glycopeptide	antibiotic target alteration
3004254	vanVB	vanVB is a vanV variant found in the vanB gene cluster. It is found in some but not all vanB operons in E. faecalis, suggesting the existence of varied gene compositions in vanB operons.	glycopeptide resistance gene cluster;vanV	glycopeptide antibiotic	Glycopeptide	antibiotic target alteration
3004290	Escherichia coli ampC beta-lactamase	A class C ampC beta-lactamase (cephalosporinase) enzyme described in Escherichia coli shown clinically to confer resistance to penicillin-like and cephalosporin-class antibiotics.	ampC-type beta-lactamase	cephalosporin;penam	Beta-lactam	antibiotic inactivation
3004291	Rhodobacter sphaeroides ampC beta-lactamase	A periplasmic cephalosporinase described in Rhodobacter sphaeroides shown to contribute to resistance of beta-lactam antibiotics.	ampC-type beta-lactamase	cephalosporin;penam	Beta-lactam	antibiotic inactivation
3004292	Laribacter hongkongensis ampC beta-lactamase	A chromosome-encoded class C beta-lactamase described in the pathogen Laribacter hongkongensis, often associated with gastroenteritis. Laribacter ampC has been shown to confer resistance to non-carbapenem beta-lactamases, as described by Lau et al. 2005.	ampC-type beta-lactamase	cephalosporin;penam	Beta-lactam	antibiotic inactivation
3004294	BUT-1	A chromosome-encoded class C cephalosporinase and penicillinase from Buttiauxella spp. shown clinically to confer resistance to beta-lactam antibiotics. Described by Fihman et al. 2002.	BUT beta-lactamase	cephalosporin	Beta-lactam	antibiotic inactivation
3004325	MCR-4.1	MCR-4 is a plasmid-borne phosphoethanolamine transferase variant of MCR-1, isolated from Salmonella enterica serovar Typhimurium of porcine origin in Italy, Spain and Belgium through 2013 and 2015-2016. MCR-4 confers resistance to collistin via addition of a phosphoethanolamine group to lipid A, reducing the negative charge of the cell membrane. Described by Carattoli et al. 2017.	MCR phosphoethanolamine transferase	peptide antibiotic	Peptide	antibiotic target alteration
3004332	MCR-5.1	MCR-5 is a transposon-associated phosphoethanolamine transferase gene, identified in Salmonella Paratyphi B dTa+ (d-tartrate fermenting Salmonella enterica subsp. enterica serovar Paratyphi B) isolates from food-producing animals. The isolates were collected between 2011 and 2013, and retrieved from the German National Reference Laboratory for Salmonella. MCR-5 confers resistance to collistin thr…	MCR phosphoethanolamine transferase	peptide antibiotic	Peptide	antibiotic target alteration
3004336	PDC-73	An AmpC-like beta-lactamase found in Pseudomonas aeruginosa.	PDC beta-lactamase	carbapenem;cephalosporin;monobactam	Beta-lactam	antibiotic inactivation
3004340	PDC-77	An AmpC-like beta-lactamase found in Pseudomonas aeruginosa	PDC beta-lactamase	carbapenem;cephalosporin;monobactam	Beta-lactam	antibiotic inactivation
3004343	PDC-80	An AmpC-like beta-lactamase found in Pseudomonas aeruginosa	PDC beta-lactamase	carbapenem;cephalosporin;monobactam	Beta-lactam	antibiotic inactivation
3004353	PDC-90	An AmpC-like beta-lactamase found in Pseudomonas aeruginosa	PDC beta-lactamase	carbapenem;cephalosporin;monobactam	Beta-lactam	antibiotic inactivation
3004357	catV	A chloramphenicol acetyltransferase identified in Brevibacillus brevis and shown to confer resistance to chloramphenicol antibiotics. Described by Pawlowski et al. 2017.	chloramphenicol acetyltransferase (CAT)	phenicol antibiotic	Phenicol	antibiotic inactivation
3004359	ACI-1	A class A beta-lactamase described in Acidaminococcus fermentans. ACI-1 was the first description of a beta-lactamase enzyme in a gram-negative anaerobic cocci. Described by Galan et al 2000.	ACI beta-lactamase	cephalosporin;penam;penem	Beta-lactam	antibiotic inactivation
3004361	sul4	sul4 is a dihydropteroate synthase gene and mobile sulfonamide resistance gene shown to confer resistance when expressed in E. coli.	sulfonamide resistant sul	sulfonamide antibiotic	Sulfonamide	antibiotic target replacement
3004364	almG	A member of the AlmEFG operon, responsible for polymyxin resistance in Vibrio cholerae. AlmG is a glycyltransferase closely related to lipid A acyltransferases. Described by Henderson JC et al. 2017.	lipid A acyltransferase	peptide antibiotic	Peptide	antibiotic target alteration
3004379	QepA4	A plasmid-mediated quinolone efflux pump variant described in Escherichia coli. QepA4 confers resistance to quinolone and fluoroquinolone antibiotics by expulsion from the cell. Described by Manageiro et al. 2017.	major facilitator superfamily (MFS) antibiotic efflux pump	fluoroquinolone antibiotic	Fluoroquinolone	antibiotic efflux
3004442	tet(W/N/W)	tet(W/N/W) is a mosaic tetracycline resistance gene and ribosomal protection protein.	tetracycline-resistant ribosomal protection protein	tetracycline antibiotic	Tetracycline	antibiotic target protection
3004444	RSA-1	RSA-1 is a class A beta-lactamase resistance enzyme identified from a functional metagenomic study of contaminated river sediments.	RSA beta-lactamase	carbapenem;cephalosporin	Beta-lactam	antibiotic inactivation
3004451	Agrobacterium fabrum chloramphenicol acetyltransferase	A chloramphenicol resistance determinant described in the Gram-negative bacterium Agrobacterium fabrum.	chloramphenicol acetyltransferase (CAT)	phenicol antibiotic	Phenicol	antibiotic inactivation
3004454	Campylobacter coli chloramphenicol acetyltransferase	A chloramphenicol resistance determinant described in Campylobacter coli.	chloramphenicol acetyltransferase (CAT)	phenicol antibiotic	Phenicol	antibiotic inactivation
3004455	Streptococcus suis chloramphenicol acetyltransferase	A chloramphenicol resistance determinant described in Streptococcus suis.	chloramphenicol acetyltransferase (CAT)	phenicol antibiotic	Phenicol	antibiotic inactivation
3004456	Enterococcus faecium chloramphenicol acetyltransferase	A chloramphenicol resistance determinant described in an Enterococcus faecium plasmid	chloramphenicol acetyltransferase (CAT)	phenicol antibiotic	Phenicol	antibiotic inactivation
3004457	Staphylococcus intermedius chloramphenicol acetyltransferase	A chloramphenicol resistance determinant described in Staphylococcus intermedius	chloramphenicol acetyltransferase (CAT)	phenicol antibiotic	Phenicol	antibiotic inactivation
3004460	Vibrio anguillarum chloramphenicol acetyltransferase	A chloramphenicol resistance determinant described in a Vibrio anguillarum plasmid sequence	chloramphenicol acetyltransferase (CAT)	phenicol antibiotic	Phenicol	antibiotic inactivation
3004466	ICR-Mc	A chromosomally-encoded colistin resistance phosphoethanolamine (PEtN) transferase of Moraxella catarrhalis. ICR-Mc is the protein that represents the closest known ortholog to the colistin resistance MCR-1 and MCR-2 PEtN transferases.	intrinsic colistin resistant phosphoethanolamine transferase	peptide antibiotic	Peptide	antibiotic target alteration
3004470	poxtA	PoxtA is an ABC-F subfamily ATP-binding cassette protein that confers resistance to tetracycline, -phenicol, and oxazolidinone via modification of the bacterial ribosome. The encoding gene was isolated from a methicillin-resistant Staphylococcus aureus strain.	ABC-F ATP-binding cassette ribosomal protection protein	lincosamide antibiotic;macrolide antibiotic;oxazolidinone antibiotic;phenicol antibiotic;pleuromutilin antibiotic;streptogramin antibiotic;tetracycline antibiotic	Multidrug	antibiotic target protection
3004476	vmlR	vmlR is an ABC-F ATPase ribosomal protection protein identified in Bacillus subtilus. Shown to confer resistance to lincomycin and streptogramin A virginiamycin. Described by Crowe-McAuliffe et al. 2018.	ABC-F ATP-binding cassette ribosomal protection protein	lincosamide antibiotic;macrolide antibiotic;oxazolidinone antibiotic;phenicol antibiotic;pleuromutilin antibiotic;streptogramin antibiotic;tetracycline antibiotic	Multidrug	antibiotic target protection
3004480	Bifidobacterium adolescentis rpoB mutants conferring resistance to rifampicin	Bifidobacterium are antibiotic resistant probiotics are prescribed to upkeep the population beneficial bacteria in the gut microbiome. However, horizontal gene transfer among gut microbes could create harmful antibiotic-resistant pathogenic bacteria, such as Mycobacterium tuberculosis. Lokesh et al. analyzed Bifidobacterium antitubercular drug resistance and mutations in rpoB. They found that B. …	rifamycin-resistant beta-subunit of RNA polymerase (rpoB)	peptide antibiotic;rifamycin antibiotic	Multidrug	antibiotic target alteration;antibiotic target replacement
3004493	ADC-68	A class C carbapenemase and extended-spectrum beta-lactamase identified from Acinetobacter baumannii	ADC beta-lactamase with carbapenemase activity	carbapenem	Beta-lactam	antibiotic inactivation
3004500	MCR-3.11	An MCR-3 phosphoethanolamine transferase and polymyxin resistance gene variant differing by 2 amino acid substitutions, identified from an Escherichia coli isolate.	MCR phosphoethanolamine transferase	peptide antibiotic	Peptide	antibiotic target alteration
3004501	MCR-6.1	An MCR-2 phosphoethanolamine transferase and polymyxin resistance gene variant identified in Moraxella isolated from pigs in the United Kingdom.	MCR phosphoethanolamine transferase	peptide antibiotic	Peptide	antibiotic target alteration
3004502	MCR-2.2	An MCR-2 phosphoethanolamine transferase and polymyxin resistance gene variant identified in Moraxella isolated from pigs in Great Britain	MCR phosphoethanolamine transferase	peptide antibiotic	Peptide	antibiotic target alteration
3004505	MCR-3.5	An MCR-3 phosphoethanolamine transferase and polymyxin (colistin) resistance gene variant identified from an extensively-resistant Escherichia coli clinical isolate.	MCR phosphoethanolamine transferase	peptide antibiotic	Peptide	antibiotic target alteration
3004506	MCR-1.10	An MCR-1 phosphoethanolamine transferase and polymyxin (colistin) resistance gene variant identified from an Escherichia porcine isolate in Great Britain.	MCR phosphoethanolamine transferase	peptide antibiotic	Peptide	antibiotic target alteration
3004507	MCR-1.9	An MCR-1 phosphoethanolamine transferase and polymyxin resistance gene variant identified from an enterotoxigenic Escherichia coli clinical isolate.	MCR phosphoethanolamine transferase	peptide antibiotic	Peptide	antibiotic target alteration
3004510	MCR-3.7	An MCR polymyxin (colistin) resistance gene variant identified in Aeromonas	MCR phosphoethanolamine transferase	peptide antibiotic	Peptide	antibiotic target alteration
3004511	MCR-3.2	An MCR-3 polymyxin resistance gene variant identified in a colistin-resistant Salmonella isolate from Canada, located on an IncHI-2 plasmid	MCR phosphoethanolamine transferase	peptide antibiotic	Peptide	antibiotic target alteration
3004516	MCR-8.1	A novel phosphoethanolamine transferase and mobile colistin resistance gene identified from carbapenem-resistant NDM-1-producing Klebsiella pneumoniae.	MCR phosphoethanolamine transferase	peptide antibiotic	Peptide	antibiotic target alteration
3004517	MCR-7.1	A novel plasmid-mediated colistin-resistant phosphoethanolamine transferase identified from a poultry isolate of Klebsiella pneumoniae	MCR phosphoethanolamine transferase	peptide antibiotic	Peptide	antibiotic target alteration
3004548	dfrA9	A dihydrofolate reductase and trimethoprim resistance gene identified from porcine isolates of Esherichia coli	trimethoprim resistant dihydrofolate reductase dfr	diaminopyrimidine antibiotic	Diaminopyrimidine	antibiotic target replacement
3004550	dfrA27	A dihydrofolate reductase and trimethoprim resistance gene from non-O1, non-O139 Vibrio cholerae	trimethoprim resistant dihydrofolate reductase dfr	diaminopyrimidine antibiotic	Diaminopyrimidine	antibiotic target replacement
3004551	dfrA28	A dihydrofolate reductase and trimethoprim resistance gene from Aeromonas hydrophilia	trimethoprim resistant dihydrofolate reductase dfr	diaminopyrimidine antibiotic	Diaminopyrimidine	antibiotic target replacement
3004568	dfrA18	A trimethoprim-resistant dihydrofolate reductase identified from Vibrio cholerae	trimethoprim resistant dihydrofolate reductase dfr	diaminopyrimidine antibiotic	Diaminopyrimidine	antibiotic target replacement
3004569	ICR-Mo	A chromosomally-encoded colistin resistance phosphoethanolamine (PEtN) transferase of Moraxella osloensis. ICR-Mo represents the closest known ortholog to the colistin resistance MCR-1 and MCR-2 PEtN transferases	intrinsic colistin resistant phosphoethanolamine transferase	peptide antibiotic	Peptide	antibiotic target alteration
3004572	Staphylococcus aureus LmrS	MFS transporters are secondary active transporters with single-polypeptide chains containing 400-600 amino acids that transport small solutes across the membrane by using electrochemical gradients. LmrS has 14 transmembrane helices and, when expressed in E. coli, is capable of extruding a variety of antibiotics inclinding linezolid, trimethoprim, florfenicol, chlorampheniocol, erythromycin, strep…	major facilitator superfamily (MFS) antibiotic efflux pump	aminoglycoside antibiotic;diaminopyrimidine antibiotic;macrolide antibiotic;oxazolidinone antibiotic;phenicol antibiotic	Multidrug	antibiotic efflux
3004573	Acinetobacter baumannii AbaF	Expression of abaF in E. coli resulted in increased resistance to fosfomycin.	major facilitator superfamily (MFS) antibiotic efflux pump	fosfomycin	Fosfomycin	antibiotic efflux
3004574	Acinetobacter baumannii AbaQ	AbaQ is an MFS transporter mainly involved in the extrusion of quinolone-type drugs in A. baumannii	major facilitator superfamily (MFS) antibiotic efflux pump	fluoroquinolone antibiotic	Fluoroquinolone	antibiotic efflux
3004577	Acinetobacter baumannii AmvA	AmvA has 14 alpha-helical transmembrane segments, qualifying it as a member of the DHA2 transporter family of the major facilitator superfamily (MFS). When AmvA was expressed in E. coli, the cells had at least four-fold decreased susceptibility to erythromycin, acridine orange, acriflavine, deoxycholate and methyl viologen. AmvA from the AC0037 strain of A. baumannii was tested.	major facilitator superfamily (MFS) antibiotic efflux pump	acridine dye;macrolide antibiotic	Multidrug	antibiotic efflux
3004580	Klebsiella pneumoniae KpnE	KpnE subunit of KpnEF resembles EbrAB from E. coli. Mutation in KpnEF resulted in increased susceptibility to cefepime, ceftriaxon, colistin, erythromycin, rifampin, tetracycline, and streptomycin as well as enhanced sensitivity toward sodium dodecyl sulfate, deoxycholate, dyes, benzalkonium chloride, chlorhexidine, and triclosan	major facilitator superfamily (MFS) antibiotic efflux pump	aminoglycoside antibiotic;cephalosporin;macrolide antibiotic;peptide antibiotic;rifamycin antibiotic;tetracycline antibiotic	Multidrug	antibiotic efflux
3004583	Klebsiella pneumoniae KpnF	KpnF subunit of KpnEF resembles EbrAB from E. coli. Mutation in KpnEF resulted in increased susceptibility to cefepime, ceftriaxon, colistin, erythromycin, rifampin, tetracycline, and streptomycin as well as enhanced sensitivity toward sodium dodecyl sulfate, deoxycholate, dyes, benzalkonium chloride, chlorhexidine, and triclosan.	major facilitator superfamily (MFS) antibiotic efflux pump	aminoglycoside antibiotic;cephalosporin;macrolide antibiotic;peptide antibiotic;rifamycin antibiotic;tetracycline antibiotic	Multidrug	antibiotic efflux
3004588	Klebsiella pneumoniae KpnG	KpnG consists of ~390 residues and resembles EmrA of E. coli. Disruption of the pump components KpnG-KpnH signficantly decrease resistance to azithromycin, ceftazidime, ciprofloxacin, ertapenem, erythromycin, gentamicin, imipenem, ticarcillin, norfloxacin, polymyxin-B, piperacillin, spectinomycin, tobramycin, and streptomycin	major facilitator superfamily (MFS) antibiotic efflux pump	aminoglycoside antibiotic;carbapenem;cephalosporin;fluoroquinolone antibiotic;macrolide antibiotic;penam;penem;peptide antibiotic	Multidrug	antibiotic efflux
3004592	erm(32)	erm(32) is a rRNA methyltransferase. Encodes methyltransferases that modify 23S rRNA.	Erm 23S ribosomal RNA methyltransferase	lincosamide antibiotic;macrolide antibiotic;streptogramin antibiotic	MLS	antibiotic target alteration
3004595	erm(45)	Erm45 is an rRNA methylase that confers resistances to macrolide, lincosamide, and streptogramin B.	Erm 23S ribosomal RNA methyltransferase	lincosamide antibiotic;macrolide antibiotic;streptogramin antibiotic	MLS	antibiotic target alteration
3004596	erm(46)	erm(46) is transferable determinant that confers resistance to macrolides.	Erm 23S ribosomal RNA methyltransferase	lincosamide antibiotic;macrolide antibiotic;streptogramin antibiotic	MLS	antibiotic target alteration
3004597	Klebsiella pneumoniae KpnH	KpnH consists of ~511 residues, resembles EmrB of E. coli, and is probably a translocase in the KpnGH-TolC efflux protein in K. pneumoniae. Disruption of the pump components KpnG-KpnH signficantly decrease resistance to azithromycin, ceftazidime, ciprofloxacin, ertapenem, erythromycin, gentamicin, imipenem, ticarcillin, norfloxacin, polymyxin-B, piperacillin, spectinomycin, tobramycin, and strept…	major facilitator superfamily (MFS) antibiotic efflux pump	aminoglycoside antibiotic;carbapenem;cephalosporin;fluoroquinolone antibiotic;macrolide antibiotic;penam;penem;peptide antibiotic	Multidrug	antibiotic efflux
3004599	clcD	clcD gene can provide resistance to representatives of five of the six antibiotic groups previously shown to be affected by Cfr. clcD was originally found in Clostridioides difficile and is cfr-like.	Cfr 23S ribosomal RNA methyltransferase	lincosamide antibiotic;oxazolidinone antibiotic;phenicol antibiotic;pleuromutilin antibiotic;streptogramin antibiotic	Multidrug	antibiotic target alteration
3004601	LnuP	LnuP is a lincosamide nucleotidyltransferase major efflux facilitator	lincosamide nucleotidyltransferase (LNU)	lincosamide antibiotic	MLS	antibiotic inactivation
3004608	EreD	erythromycin esterase protein	macrolide esterase	macrolide antibiotic	MLS	antibiotic inactivation
3004611	Escherichia coli ampC1 beta-lactamase	An ampC-like beta-lactamase identified from Escherichia coli.	ampC-type beta-lactamase	cephalosporin;penam	Beta-lactam	antibiotic inactivation
3004612	Escherichia coli ampH beta-lactamase	AmpH is a class C ampC-like beta-lactamase and penicillin-binding protein identified in Escherichia coli.	ampC-type beta-lactamase	cephalosporin;penam	Beta-lactam	antibiotic inactivation
3004615	ADC-11	ADC-11 is a class C beta-lactamase found in Acinetobacter baumannii	ADC beta-lactamase without carbapenemase activity	cephalosporin	Beta-lactam	antibiotic inactivation
3004621	AAC(3)-IIe	AAC(3)-IIe is a plasmid-encoded aminoglycoside acetyltransferase in E. coli	AAC(3)	aminoglycoside antibiotic	Aminoglycoside	antibiotic inactivation
3004623	AAC(3)-IId	AAC(3)-IId is a plasmid-encoded aminoglycoside acetyltransferase in E. coli	AAC(3)	aminoglycoside antibiotic	Aminoglycoside	antibiotic inactivation
3004624	QnrS11	QnrS11 is a plasmid-mediated quinolone resistance protein.	quinolone resistance protein (qnr)	fluoroquinolone antibiotic	Fluoroquinolone	antibiotic target protection
3004626	Erm(49)	Erm(49) is an rRNA methylase gene	Erm 23S ribosomal RNA methyltransferase	lincosamide antibiotic;macrolide antibiotic;streptogramin antibiotic	MLS	antibiotic target alteration
3004627	QnrS15	QnrS15 is a plasmid-mediated quinolone resistance protein.	quinolone resistance protein (qnr)	fluoroquinolone antibiotic	Fluoroquinolone	antibiotic target protection
3004629	AAC(6')-Im	AAC(6')-Im is an aminoglycoside acetyltransferase encoded by plasmids in E. coli, and E. faecium	AAC(6')	aminoglycoside antibiotic	Aminoglycoside	antibiotic inactivation
3004635	AAC(6')-Il	AAC(6')-Il is an aminoglycoside acetyltransferase encoded by plasmids and integrons in Enterobacter cloaecae and Klebsiella aerogenes	AAC(6')	aminoglycoside antibiotic	Aminoglycoside	antibiotic inactivation
3004639	Corynebacterium striatum tetA	tetAB genes of the Corynebacterium striatum R-plasmid which encode an ABC transporter and confer tetracycline, oxytetracycline, and oxalic resistance	major facilitator superfamily (MFS) antibiotic efflux pump	penam;tetracycline antibiotic	Multidrug	antibiotic efflux
3004643	Erm(K)	23S rRNA (adenine(2058)-N(6))-methyltransferase Erm(K) [Bacillus halodurans]	Erm 23S ribosomal RNA methyltransferase	lincosamide antibiotic;macrolide antibiotic;streptogramin antibiotic	MLS	antibiotic target alteration
3004644	dfrA6 from Proteus mirabilis	dfrA6 is a dihydrofolate reductase that confers resistance to trimethoprim.	trimethoprim resistant dihydrofolate reductase dfr	diaminopyrimidine antibiotic	Diaminopyrimidine	antibiotic target replacement
3004645	dfrI	dfrI is a dihydrofolate reductase that is resistant to trimethoprim.	trimethoprim resistant dihydrofolate reductase dfr	diaminopyrimidine antibiotic	Diaminopyrimidine	antibiotic target replacement
3004647	AQU-2	AQU-2 is a chromosomally-encoded AQU class C beta-lactamase and cephalosporinase from Aeromonas	AQU beta-lactamase	cephalosporin	Beta-lactam	antibiotic inactivation
3004649	cfr(B)	cfr(B) has been observed in mobile genetic elements in E. faecium and Clostridioides difficile and confers resistance to linezolid, clindamycin, erythromycin, chloramphenicol, and retapamulin.	Cfr 23S ribosomal RNA methyltransferase	lincosamide antibiotic;oxazolidinone antibiotic;phenicol antibiotic	Multidrug	antibiotic target alteration
3004650	tetU	Tetracycline-resistant determinant encoded on the plasmid pKQ10 in Enterococcus faecium	major facilitator superfamily (MFS) antibiotic efflux pump	tetracycline antibiotic	Tetracycline	antibiotic efflux
3004651	lin	Listeria monocytogenes EGD-e lin gene for lincomycin resistance ABC-F type ribosomal protection protein, complete CDS.	lincosamide nucleotidyltransferase (LNU)	lincosamide antibiotic	MLS	antibiotic inactivation
3004652	Erm(O)-lrm	ErmO (gene lrm) lincomycin resistance methylase [Streptomyces lividans].	Erm 23S ribosomal RNA methyltransferase	lincosamide antibiotic;macrolide antibiotic;streptogramin antibiotic	MLS	antibiotic target alteration
3004656	catII from Escherichia coli K-12	catII is a chloramphenicol acetyltransferase. This particular catII is found in E.coli K-12. Confers resistance to chloramphenicol.	chloramphenicol acetyltransferase (CAT)	phenicol antibiotic	Phenicol	antibiotic inactivation
3004657	catA4	catA4 is a chloramphenicol acetyltransferase that confers resistance to chloramphenicol.	chloramphenicol acetyltransferase (CAT)	phenicol antibiotic	Phenicol	antibiotic inactivation
3004658	catA8	catA8 is a chloramphenicol acetyltransferase that confers resistance to chloramphenicol.	chloramphenicol acetyltransferase (CAT)	phenicol antibiotic	Phenicol	antibiotic inactivation
3004659	Mef(En2)	NBU2-encoded resistance gene. An MefE homolog in Bacteroides species. Macrolide efflux MFS transporter	major facilitator superfamily (MFS) antibiotic efflux pump	macrolide antibiotic	MLS	antibiotic efflux
3004660	catB11	catB11 is a chloramphenicol acetyltransferase that confers resistance to chloramphenicol.	chloramphenicol acetyltransferase (CAT)	phenicol antibiotic	Phenicol	antibiotic inactivation
3004662	MCR-3.3	MCR-3.3 is a colistin resistance gene variant in the chromosome of an Aeromonas veronii. Conferred polymyxin resistance in both E. Coli and Aeromonas salmonicida	MCR phosphoethanolamine transferase	peptide antibiotic	Peptide	antibiotic target alteration
3004663	FusF	A fusidic acid resistance determinant in Staphylococcus cohnii. FusD-like	fusidic acid inactivation enzyme	fusidic acid	Fusidic acid	antibiotic inactivation
3004665	cmlA8	cmlA8 is a plasmid that confers resistance to chloramphenicol.	major facilitator superfamily (MFS) antibiotic efflux pump	phenicol antibiotic	Phenicol	antibiotic efflux
3004666	pexA	pexA is a florfenicol and chloramphenicol resistance gene discovered in Alaskan soil.	major facilitator superfamily (MFS) antibiotic efflux pump	phenicol antibiotic	Phenicol	antibiotic efflux
3004667	Staphylococcus aureus norA	NorA gene cloned from Staphylococcus aureus conferred relatively high resistance to hydrophilic quinolones such as norfloxacin, enoxacin, ofloxacin, and ciprofloxacin in S. aureus and Escherichia coli. Had low or no resistance at all to hydrophobic ones such as nalidixic acid, oxolinic acid, and sparfloxacin in S. aureus and Escherichia coli.	major facilitator superfamily (MFS) antibiotic efflux pump	fluoroquinolone antibiotic	Fluoroquinolone	antibiotic efflux
3004669	emtA	A rRNA methyltransferase conferring high-level evernimicin resistance	non-erm 23S ribosomal RNA methyltransferase (G748)	lincosamide antibiotic;macrolide antibiotic	MLS	antibiotic target alteration
3004677	rmtD2	The first allele of a 16S rRNA methyltransferase gene, rmtD2, confers a high resistance to all clinically available aminoglycosides	16S rRNA methyltransferase (G1405)	aminoglycoside antibiotic	Aminoglycoside	antibiotic target alteration
3004678	rmtE	Aminoglycoside-resistance gene	16S rRNA methyltransferase (G1405)	aminoglycoside antibiotic	Aminoglycoside	antibiotic target alteration
3004682	aadA27	Small mobilizable plasmid pALWED1.8 containing a novel variant of the streptomycin/spectinomycin resistance gene	ANT(3'')	aminoglycoside antibiotic	Aminoglycoside	antibiotic inactivation
3004683	aadS	a novel Tn4551 streptomycin-resistance gene that was phenotypically silent in wild-type Bacteroides; expression could be activated by a trans-acting chromosomal mutation	ANT(6)	aminoglycoside antibiotic	Aminoglycoside	antibiotic inactivation
3004684	MCR-9.1	A mobilized and plasmid-mediated colistin resistance gene and phosphoethanolamine transferase identified from a Salmonella enterica isolate	MCR phosphoethanolamine transferase	peptide antibiotic	Peptide	antibiotic target alteration
3004686	MCR-1.7	A plasmid-mediated MCR-1 variant identified from Escherichia coli.	MCR phosphoethanolamine transferase	peptide antibiotic	Peptide	antibiotic target alteration
3004691	MCR-3.4	A plasmid-mediated MCR-3.1 variant	MCR phosphoethanolamine transferase	peptide antibiotic	Peptide	antibiotic target alteration
3004693	MCR-3.12	A plasmid-mediated phosphoethanolamine transferase and MCR-3 variant conferring resistance to colistin antibiotics.	MCR phosphoethanolamine transferase	peptide antibiotic	Peptide	antibiotic target alteration
3004694	MCR-4.2	A plasmid-mediated MCR-4 variant which confers resistance to colistin antibiotics.	MCR phosphoethanolamine transferase	peptide antibiotic	Peptide	antibiotic target alteration
3004695	MCR-4.3	A plasmid-mediated MCR-4 variant and colistin resistance gene from clinical Enterobacteriaceae	MCR phosphoethanolamine transferase	peptide antibiotic	Peptide	antibiotic target alteration
3004696	MCR-4.4	A plasmid-mediated MCR-4 variant and colistin resistance gene	MCR phosphoethanolamine transferase	peptide antibiotic	Peptide	antibiotic target alteration
3004697	MCR-4.5	A plasmid-mediated MCR-4 variant and colistin resistance gene	MCR phosphoethanolamine transferase	peptide antibiotic	Peptide	antibiotic target alteration
3004698	MCR-5.2	A plasmid-mediated MCR-5 variant from Escheichia coli which confers resistance to colistin antibiotics.	MCR phosphoethanolamine transferase	peptide antibiotic	Peptide	antibiotic target alteration
3004699	sta	Streptothricin acetyltransferase gene (STAT gene) that confers streptothricin resistance on Escherichia coli and Bacillus subtilis.	streptothricin acetyltransferase (SAT)	nucleoside antibiotic	Nucleoside	antibiotic inactivation
3004715	vga(E) Staphylococcus cohnii	vga(E) gene variant that confers resistance to pleuromutilins, lincosamides and streptogramin A antibiotics in staphylococci	ABC-F ATP-binding cassette ribosomal protection protein	lincosamide antibiotic;macrolide antibiotic;oxazolidinone antibiotic;phenicol antibiotic;pleuromutilin antibiotic;streptogramin antibiotic;tetracycline antibiotic	Multidrug	antibiotic target protection
3004719	Tet(X3)	A tetracyline resistance gene located on an approximately 300-kb plasmid, designated p47AB. It inactivates all tetracyclines, including tigecycline, eravacycline, and omadacycline.Adjacent to insertion sequence ISVsa3 on the conjugative plasmid.	tetracycline inactivation enzyme	glycylcycline;tetracycline antibiotic	Tetracycline	antibiotic inactivation
3004720	Tet(X4)	A tetracyline resistance gene located on an approximately 180-kb plasmid, designated p47EC. It inactivates all tetracyclines, including tigecycline, eravacycline, and omadacycline.Adjacent to insertion sequence ISVsa3 on the conjugative plasmid.	tetracycline inactivation enzyme	glycylcycline;tetracycline antibiotic	Tetracycline	antibiotic inactivation
3004730	tva(A)	A pleuromutilin resistance gene encoding a predicted ABC-F transporter. The presence of inhibitory or sub-inhibitory concentrations of tiamulin showed that tva(A) confers reduced pleuromutilin susceptibility that does not lead to clinical resistance but facilitates the development of higher-level resistance via mutations in genes encoding ribosome-associated functions.	ABC-F ATP-binding cassette ribosomal protection protein	lincosamide antibiotic;macrolide antibiotic;oxazolidinone antibiotic;phenicol antibiotic;pleuromutilin antibiotic;streptogramin antibiotic;tetracycline antibiotic	Multidrug	antibiotic target protection
3004735	ARL-2	ARL-2 is a beta-lactamase gene found in Staphylococcus Arlettae.	ARL Beta-lactamase	penam	Beta-lactam	antibiotic inactivation
3004737	ARL-4	ARL-4 is a beta-lactamase gene found in Staphylococcus arlettae.	ARL Beta-lactamase	penam	Beta-lactam	antibiotic inactivation
3004747	BAT-1	BAT-1 is a class D beta-lactamase found in Bacillus atrophaeus.	BAT Beta-lactamase	cephalosporin	Beta-lactam	antibiotic inactivation
3004749	BCL-1	BCL-1 is a class A beta-lactamase found in Bacillus clausii.	BCL Beta-lactamase	penam	Beta-lactam	antibiotic inactivation
3004751	BES-1	BES-1 is a class A beta-lactamase that is found in Serratia marcescens.	BES Beta-lactamase	penam	Beta-lactam	antibiotic inactivation
3004759	BPU-1	BPU-1 is a class D beta-lactamase found in Bacillus pumilus.	BPU Beta-lactamase	penam	Beta-lactam	antibiotic inactivation
3004761	BRO-1	BRO-1 is a class A beta-lactamase found in M.catarrhalis.	BRO Beta-lactamase	penam	Beta-lactam	antibiotic inactivation
3004762	BRO-2	BRO-2 is a class A beta-lactamase found in M.catarrhalis.	BRO Beta-lactamase	penam	Beta-lactam	antibiotic inactivation
3004764	CBP-1	CBP-1 is a class A beta-lactamase gene found in C. botulinum.	CBP beta-lactamase	penam	Beta-lactam	antibiotic inactivation
3004766	CGA-1	CGA-1 is a class A beta-lactamase gene found in Chryseobacterium gleum.	CGA beta-lactamase	penam	Beta-lactam	antibiotic inactivation
3004769	CIA-2	CIA-2 is a class A beta-lactamase gene found in Chryseobacterium indologenes.	CIA beta-lactamase	carbapenem;cephalosporin	Beta-lactam	antibiotic inactivation
3004775	CME-1	CME-1 is a class A beta-lactamase gene belonging to Chryseobacterium meningosepticum.	CME beta-lactamase	penam	Beta-lactam	antibiotic inactivation
3004780	DES-1	DES-1 is a class A beta-lactamase gene found in Desulfovibrio desulfuricans.	DES beta-lactamase	penam	Beta-lactam	antibiotic inactivation
3004784	FAR-1	FAR-1 is a class A beta-lactamase gene found in Nocardia farcinica.	FAR beta-lactamase	penam	Beta-lactam	antibiotic inactivation
3004795	FPH-1	FPH-1 is a carbapenem-hydrolyzing class A beta-lactamase gene found in Francisella philomiragia.	FPH beta-lactamase	penam	Beta-lactam	antibiotic inactivation
3004801	FTU-1	FTU-1 is a class A beta-lactamase gene found in Francisella tularensis. It causes Tularemia.	FTU beta-lactamase	penam	Beta-lactam	antibiotic inactivation
3004802	GOB-10	GOB-10 is a class B beta-lactamase gene found in Chryseobacterium meningosepticum.	GOB beta-lactamase	carbapenem;cephalosporin;penam	Beta-lactam	antibiotic inactivation
3004803	GOB-11	GOB-11 is a class B beta-lactamase gene found in Chryseobacterium meningosepticum.	GOB beta-lactamase	carbapenem;cephalosporin;penam	Beta-lactam	antibiotic inactivation
3004804	GOB-12	GOB-12 is a class B beta-lactamase gene found in Elizabethkingia meningoseptica.	GOB beta-lactamase	carbapenem;cephalosporin;penam	Beta-lactam	antibiotic inactivation
3004805	GOB-13	GOB-13 is a class B beta-lactamase gene found in Elizabethkingia meningoseptica.	GOB beta-lactamase	carbapenem;cephalosporin;penam	Beta-lactam	antibiotic inactivation
3004808	GOB-16	GOB-16 is a class B beta-lactamase gene found in Elizabethkingia meningoseptica.	GOB beta-lactamase	carbapenem;cephalosporin;penam	Beta-lactam	antibiotic inactivation
3004810	GOB-3	GOB-3 is a class B beta-lactamase gene found in Elizabethkingia meningoseptica.	GOB beta-lactamase	carbapenem;cephalosporin;penam	Beta-lactam	antibiotic inactivation
3004812	GOB-5	GOB-5 is a class B beta-lactamase gene found in Elizabethkingia meningoseptica.	GOB beta-lactamase	carbapenem;cephalosporin;penam	Beta-lactam	antibiotic inactivation
3004813	GOB-6	GOB-6 is a class B beta-lactamase gene found in Elizabethkingia meningoseptica.	GOB beta-lactamase	carbapenem;cephalosporin;penam	Beta-lactam	antibiotic inactivation
3004814	GOB-7	GOB-7 is a class B beta-lactamase gene found in Elizabethkingia meningoseptica.	GOB beta-lactamase	carbapenem;cephalosporin;penam	Beta-lactam	antibiotic inactivation
3004816	GOB-9	GOB-9 is a class B beta-lactamase gene found in Elizabethkingia meningoseptica.	GOB beta-lactamase	carbapenem;cephalosporin;penam	Beta-lactam	antibiotic inactivation
3004826	LAP-2	LAP-2 is an Ambler Class A beta-lactamase gene conferring resistance to quinolones.	LAP beta-lactamase	aminoglycoside antibiotic;fluoroquinolone antibiotic;rifamycin antibiotic;tetracycline antibiotic	Multidrug	antibiotic inactivation

## Sheet: Table S2
Table S2. Effect of fiber level on relative abundance of ARGs mechanism in colon of different pig breeds
	Duroc		Xiangcun Pig		Taoyuan Pig		SEM	P-value1
	Low-Fiber	High-Fiber	Low-Fiber	High-Fiber	Low-Fiber	High-Fiber		Diets	Breeds	Interaction
antibiotic efflux	20470.5	19820.3	20875.4	19966.9	22048	20832.8	194.7	0.1049	0.0147	0.7278
antibiotic target alteration	12091.5	11799	12118.3	12035.9	11852.2	11657.8	90.52	0.3816	0.3994	0.8299
antibiotic target protection	6367.07	6166.75	6706.15	6602.68	6995.09	6837.86	64.02	0.2445	0.001	0.9266
antibiotic inactivation	3243.6	3147.5	3186.13	2952.81	2875.93	2733.07	45.9	0.12	0.0056	0.7259
antibiotic target replacement	1546.48	1579.55	1538.71	1537.33	1576.87	1533.77	12.63	0.883	0.6586	0.5119
reduced permeability to antibiotic	76.5842	103.106	88.0272	75.8001	95.6495	88.0973	4.022	0.8055	0.5332	0.0573
1P < 0.05 indicates significant difference.

## Sheet: Table S3
Supplementary Table 3. Effect of fiber level on relative abundance of top 40 ARGs in colonic content of different pig breeds
	Duroc		Xiangcun Pig		Taoyuan Pig		SEM	P-value1
	Low-Fiber	High-Fiber	Low-Fiber	High-Fiber	Low-Fiber	High-Fiber		Diets	Breeds	Interaction
macB	2950.75	2808.87	2981.23	2764.88	3152.1	2988.53	30.04	0.0238	0.009	0.7065
bcrA	1706.83	1688.76	1672.1	1795.74	1787.54	1787.69	23.54	0.4532	0.2711	0.4331
tetA(58)	1291.85	1303.01	1268.84	1186.25	1337.2	1230.16	19.3	0.2249	0.3192	0.3285
msbA	1166.46	998.805	1202.92	1190.4	1390.03	1206.8	30.23	0.1923	0.0046	0.3185
efrA	939.63	833.021	896.695	792.876	997.873	841.687	13.66	0.0007	0.0568	0.2794
oleC	832.559	834.393	881.529	883.527	901.751	905.181	11.93	0.9474	0.0456	0.9983
arlS	683.894	634.827	683.696	636.924	761.59	668.334	12.28	0.038	0.1484	0.555
arlR	631.711	621.958	631.53	679.799	713.518	659.693	11.63	0.8782	0.0366	0.2059
mtrA	603.336	647.277	671.471	660.174	663.947	652.404	10.2	0.7839	0.1728	0.4854
TaeA	573.912	607.362	596.372	622.076	622.045	684.885	11.13	0.0337	0.066	0.7497
vanRF	606.384	628.052	602.619	607.046	564.063	659.35	14.05	0.1916	0.9137	0.3737
optrA	601.555	551.835	582.457	552.812	602.437	557.696	7.38	0.0003	0.7657	0.8569
patA	564.447	513.06	584.909	488.334	688.615	604.47	16	0.0399	0.0036	0.7504
lmrD	537.958	493.669	532.317	459.326	624.779	519.389	10.15	0.0005	0.0049	0.3456
novA	555.008	494.379	541.852	448.546	556.447	471.741	10.41	0.0015	0.4322	0.7334
rpoB2	551.188	511.734	515.78	470.671	537.562	474.671	6.99	0.0134	0.069	0.6057
baeS	506.391	500.104	491.963	477.062	480.171	488.795	8.28	0.8595	0.5842	0.7305
tetW	467.359	435.469	493.762	450.901	556.817	529.508	11.78	0.1092	0.0126	0.8941
evgS	410.014	457.527	514.581	488.436	438.64	527.698	13	0.0165	0.17	0.0903
patB	469.059	416.925	449.442	455.062	484.9	450.913	7.33	0.2593	0.1471	0.1888
tetQ	286.268	406.433	498.499	543.171	312.521	427.502	23.53	0.0934	0.0078	0.7094
vanRM	368.231	358.637	378.19	366.078	406.137	458.307	11.69	0.7341	0.0544	0.2108
lsaB	417.108	396.861	378.053	379.779	374.202	327.6	9.04	0.1686	0.1483	0.4556
tetO	334.723	317.882	351.168	375.389	380.728	423.779	12.37	0.6157	0.0528	0.5149
LlmA 23S ribosomal RNA methyltransferase	372.486	343.428	342.396	368.351	359.611	348.977	6.5	0.7763	0.9678	0.2597
smeS	360.222	338.242	364.308	332.369	362.68	342.359	6.05	0.1178	0.9432	0.9076
bacA	382.045	356.035	327.649	346.547	336.933	304.166	6.22	0.2538	0.0267	0.0397
tet(W/N/W)	327.62	308.311	358.25	318.648	388.96	349.164	6.72	0.0502	0.0114	0.6051
RlmA(II)	311.003	347.81	377.098	396.68	296.875	316.827	9.5	0.1367	0.0015	0.9062
tet(40)	316.57	319.837	330.505	322.571	345.497	377.413	6.98	0.3145	0.0455	0.5284
efrB	356.565	317.335	325.54	288.483	372.889	350.712	6.69	0.0034	0.0258	0.7381
tetT	304.551	315.079	317.539	316.542	325.475	372.134	6.33	0.0903	0.064	0.2961
vanRI	369.611	324.505	323.091	286.767	325.348	292.3	8.21	0.0586	0.0581	0.8709
lsaC	266.889	267.557	304.735	294.411	367.817	368.514	13.72	0.9118	0.0035	0.9717
tetB(P)	317.42	280.547	338.277	294.638	351.361	276.613	5.07	P<0.0001	0.1033	0.0637
APH(3')-IIIa	441.936	380.159	351.771	278.811	188.761	157.184	16.23	0.05	P<0.0001	0.5373
kdpE	309.056	278.472	305.386	260.43	298.15	277.973	5.7	0.0174	0.6111	0.6783
tet(44)	306.625	243.495	265.967	306.839	293.791	226.289	9.86	0.1666	0.5329	0.0219
tetB(60)	272.462	242.485	244.937	281.213	302.74	273.731	6.14	0.5957	0.0821	0.0251
PmrF	232.406	269.007	292.77	297.719	252.017	244.454	7.46	0.3927	0.0109	0.5319
1P < 0.05 indicates significant difference.

## Sheet: Table S4
Table S4. Primers used in this study
Gene Name	Forward Primer	Reverse Primer
16S rRNA	GTGSTGCAYGGYTGTCGTCA	ACGTCRTCCMCACCTTCCTC	-
tetA	CAGGCAGGTGGATGAGGAA	GGCAGGCAGAGCAAGTAGAG	Tetracyclines
tetC	TGCAACTCGTAGGACAGGTG	ACCAGTGACGAAGGCTTGAG	Tetracyclines
tetX	GAAAGAGACAACGACCGAGAG	ACACCCATTGGTAAGGCTAAG	Tetracyclines
tetM	ACAGAAAGCTTATTATATAAC	TGGCGTGTCTATGATGTTCAC	Tetracyclines
tetO	ACGGARAGTTTATTGTATACC	TGGCGTATCTATAATGTTGAC	Tetracyclines
tetQ	AGAATCTGCTGTTTGCCAGTG	CGGAGTGTCAATGATATTGCA	Tetracyclines
tetW	GAGAGCCTGCTATATGCCAGC	GGGCGTATCCACAATGTTAAC	Tetracyclines
Sul1	CGCACCGGAAACATCGCTGCAC	TGAAGTTCCGCCGCAAGGCTCG	Sulfonamides
Sul2	TCCGGTGGAGGCCGGTATATGG	CGGGAATGCCATCTGCCTTGAG	Sulfonamides
ermC	GAAATCGGCTCAGGAAAAGG	TAGCAAACCCGTATTCCACG	Macrolides
ermB	AAAACTTACCCGCCATACCA	TTTGGCGTGTTTCATTGCTT	Macrolides
blaTEM	GCKGCCAACTTACTTCTGACAACG	CTTTATCCGCCTCCATCCAGTCTA	Beta-Lactamas
blaNDM	GCCATCCCTGACGATCAAA	CTGAGCACCGCATTAGCCG	Beta-Lactamas
oqxA	CTCGGCGCGATGATGCT	CCACTCTTCACGGGAGACGA	FCA
oqxB	TCCTGATCTCCATTAACGCCCA	ACCGGAACCCATCTCGATGC	FCA
qnrS	GACGTGCTAACTTGCGTGAT	TGGCATTGTTGGAAACTTG	FCA
cfr	TGTGCTACAGGCAACATTGGAT	CAAATACTTGACGGTTGGCTAGAG	FCA
cmlA	GCCAGCAGTGCCGTTTAT	GGCCACCTCCCAGTAGAA	Chloramphenicols
fexA	ATTCTCCCGCAAATAACG	TCG GCTCAGTAGCATCACG	Chloramphenicols
strB	ATCGCTTTGCAGCTTTGTTT	ATGATGCAGATCGCCATGTA	Aminoglycosides
int1	GGCTTCGTGATGCCTGCTT	CATTCCTGGCCGTGGTTCT	Integrase gene
mcr-1	CGGTCAGTCCGTTTGTTC	CTTGGTCGGTCTGTAGGG	Colistin
